# Supplementary material for: Selanyl and tellanyl electrophiles as a driving force in the construction of sophisticated polyaromatic hydrocarbons
Source: Royal Society of Chemistry journal article supplement (doi:10.1039/d1nj00401h), 2021-01-01

## **Selanyl and tellanyl electrophiles as driving force in construction of sophisticated polyaromatic hydrocarbons**

Pavel Arsenyan,\* Alla Petrenko, Sergey Belyakov

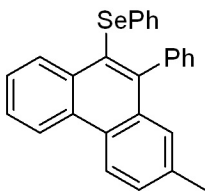

2a

8.74  
8.72  
8.69  
8.67  
8.65  
7.68  
7.67  
7.66  
7.66  
7.65  
7.64  
7.64  
7.56  
7.54  
7.52  
7.46  
7.45  
7.44  
7.43  
7.43  
7.42  
7.25  
7.24  
7.24  
7.23  
7.22  
7.21  
7.06  
7.04  
7.02

—2.41

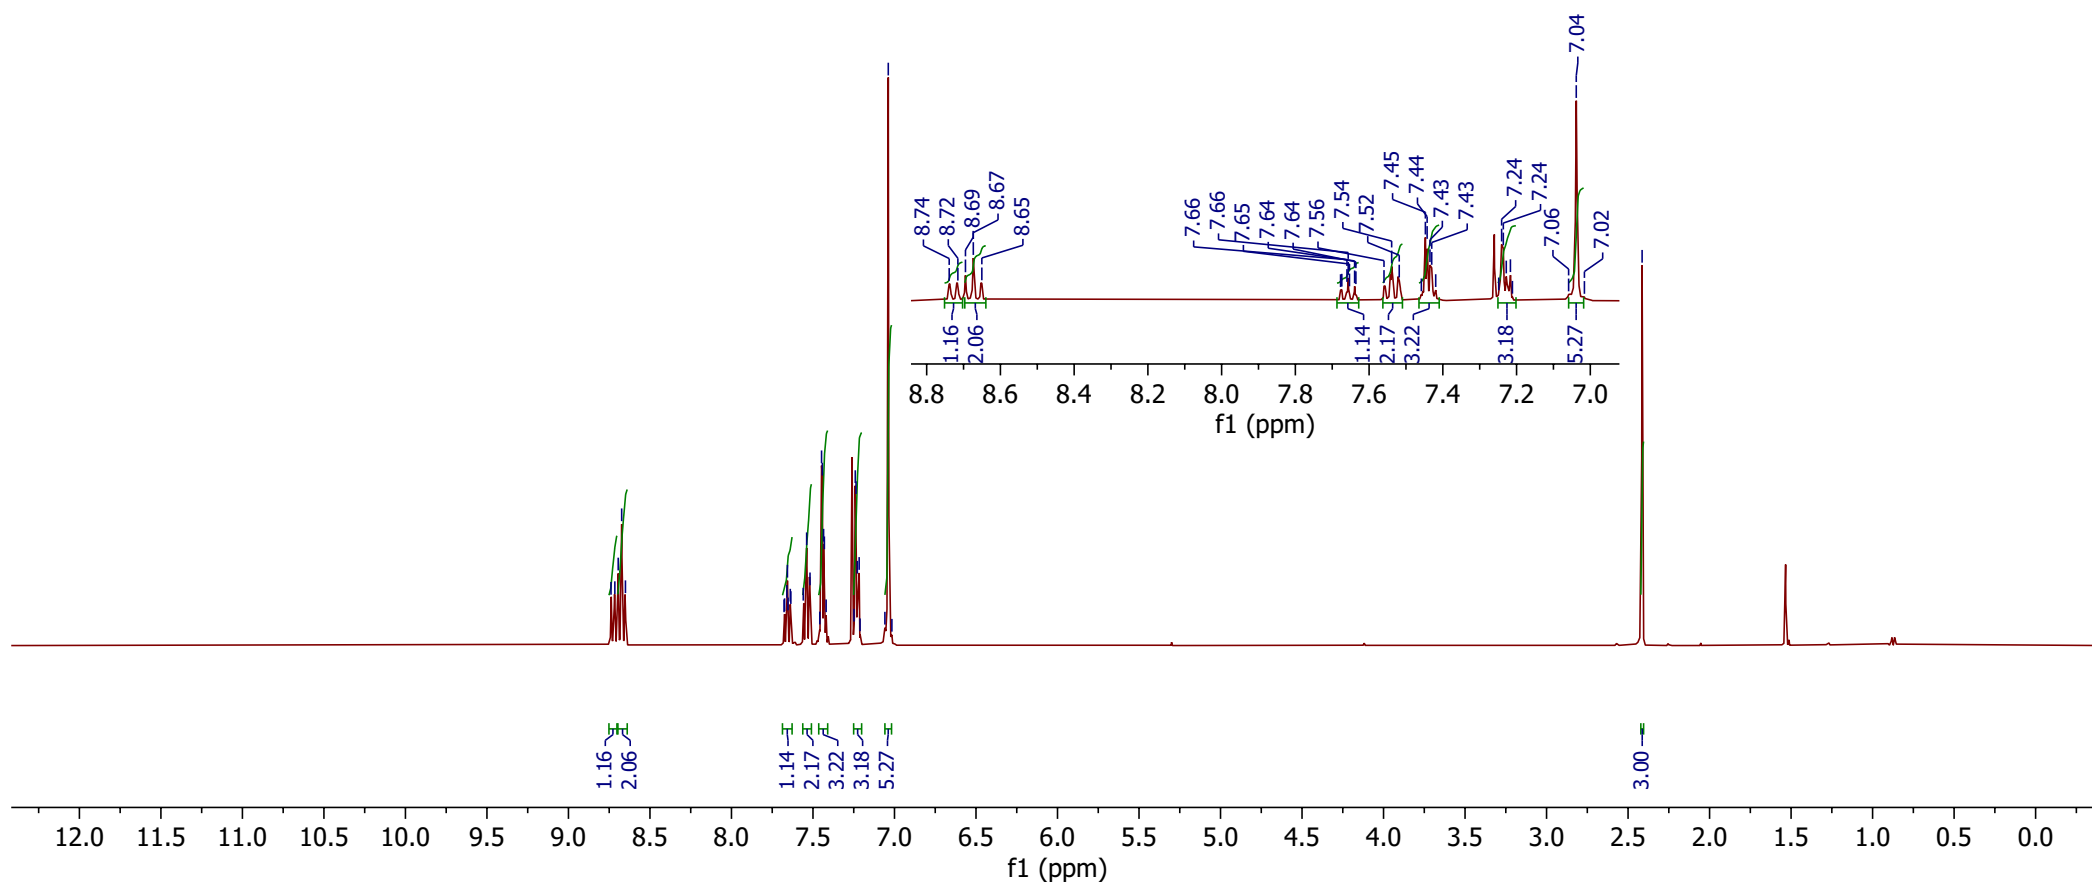

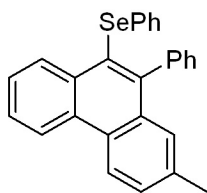

2a

146.76  
142.25  
136.76  
134.52  
132.41  
132.23  
130.92  
130.74  
129.83  
129.37  
129.25  
129.14  
129.05  
128.53  
128.09  
127.78  
127.41  
127.30  
127.11  
125.58  
122.69  
122.65

21.81

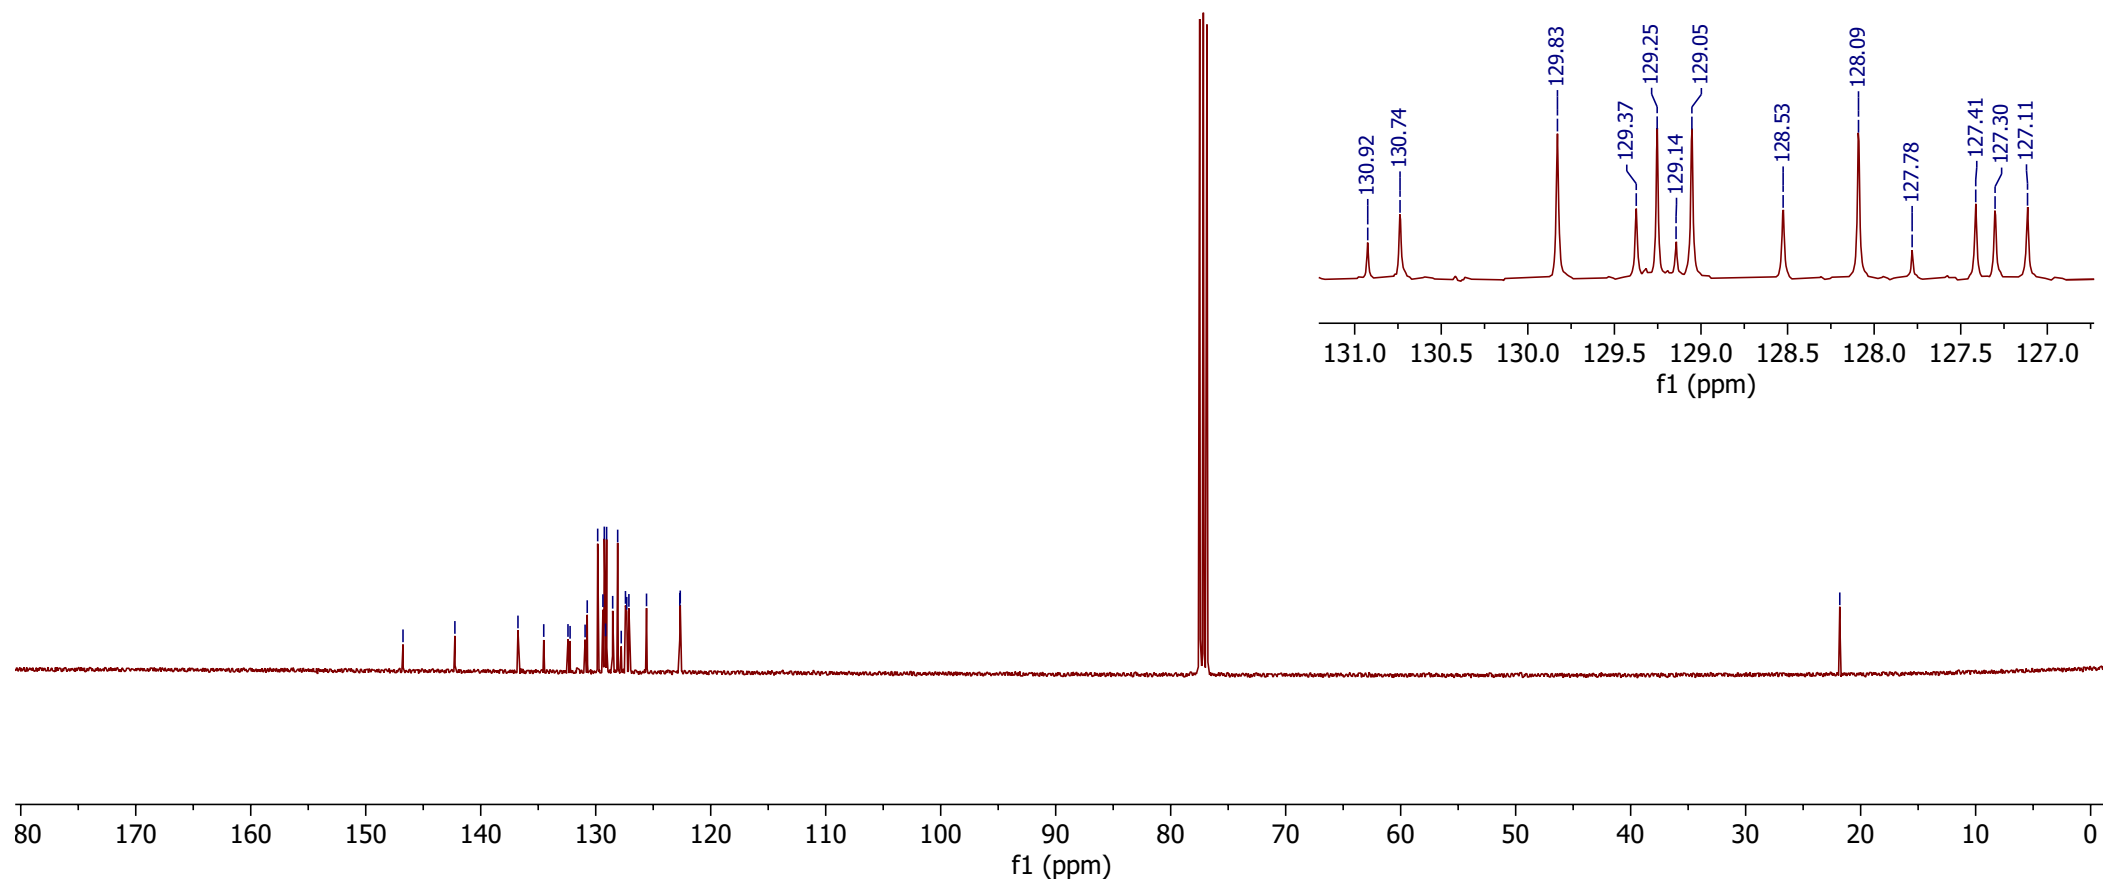

$^{77}\text{Se}$  NMR of **2a**

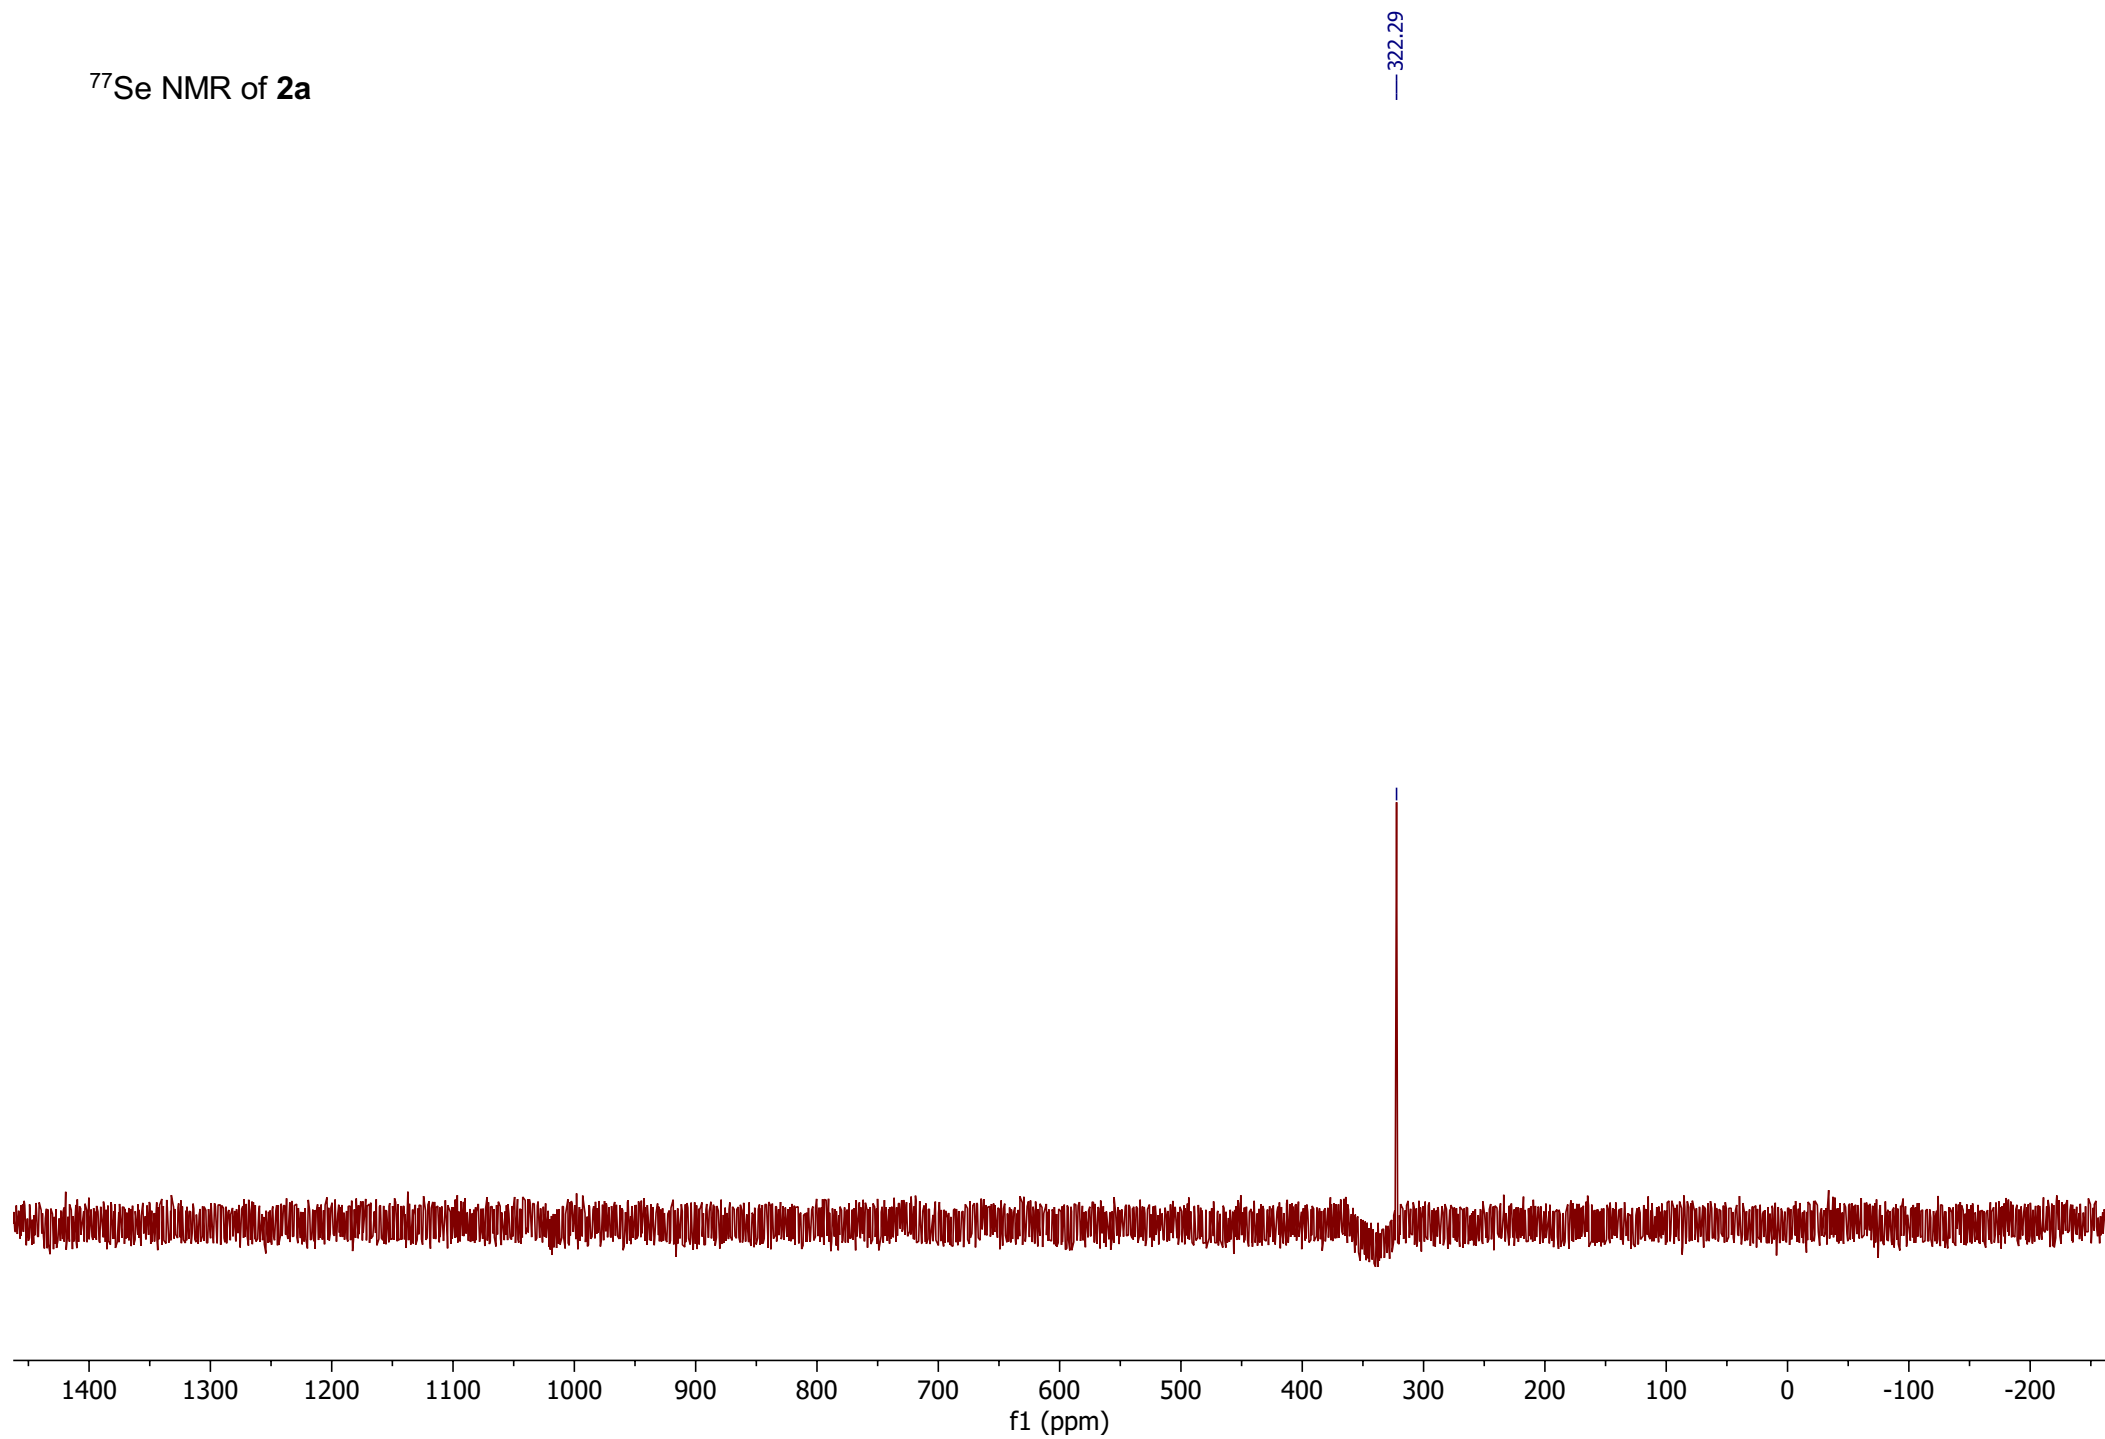

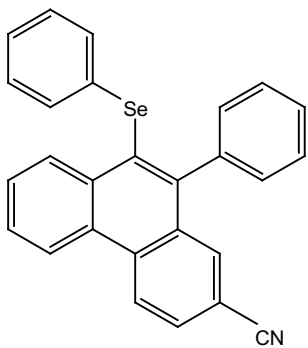

**2b**

8.85  
8.83  
8.75  
8.75  
8.73  
8.73  
8.72  
7.87  
7.86  
7.85  
7.84  
7.83  
7.83  
7.76  
7.76  
7.75  
7.74  
7.74  
7.72  
7.72  
7.72  
7.69  
7.69  
7.67  
7.67  
7.67  
7.65  
7.65  
7.52  
7.52  
7.51  
7.50  
7.50  
7.49  
7.48  
7.48  
7.47  
7.47  
7.45  
7.45  
7.45  
7.44  
7.44  
7.21  
7.21  
7.20  
7.19  
7.19  
7.19  
7.19  
7.08  
7.07  
7.06  
7.06  
7.05  
7.05  
7.04  
7.04  
7.04  
7.04  
7.03  
7.02  
7.02

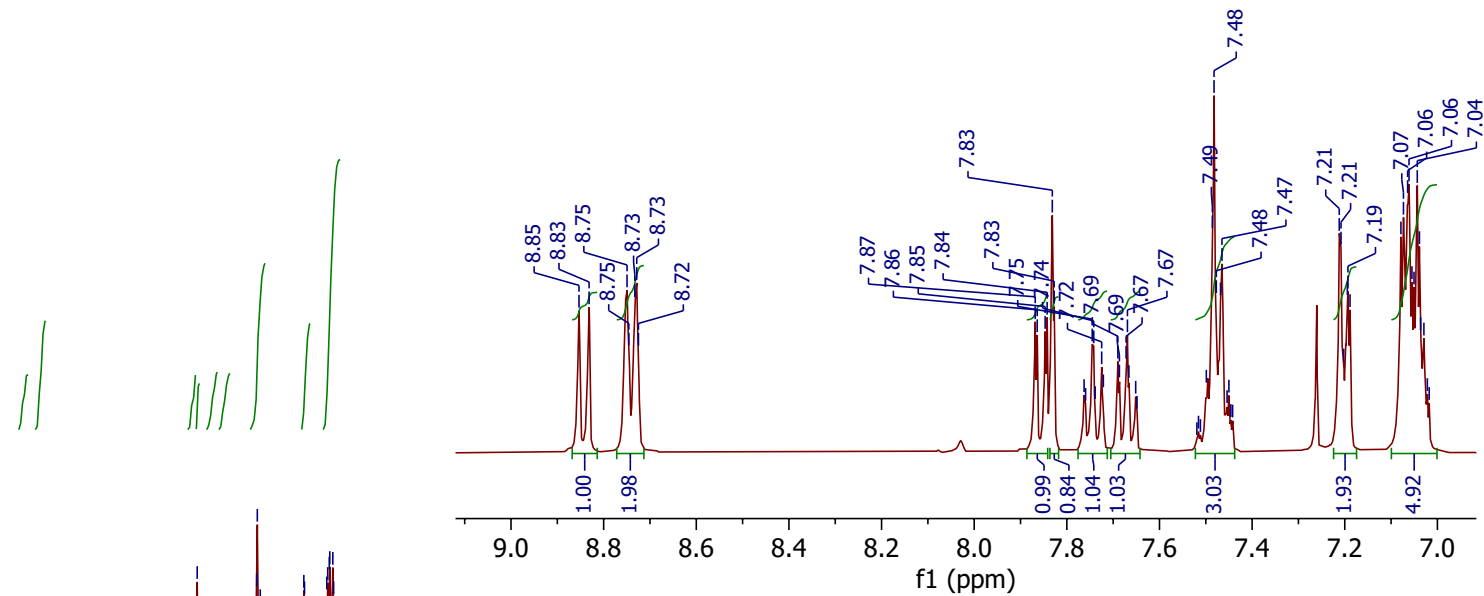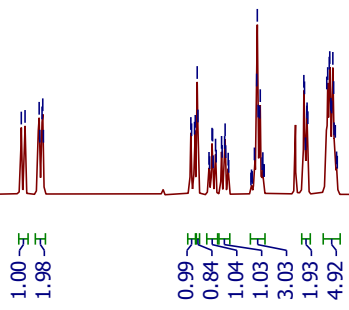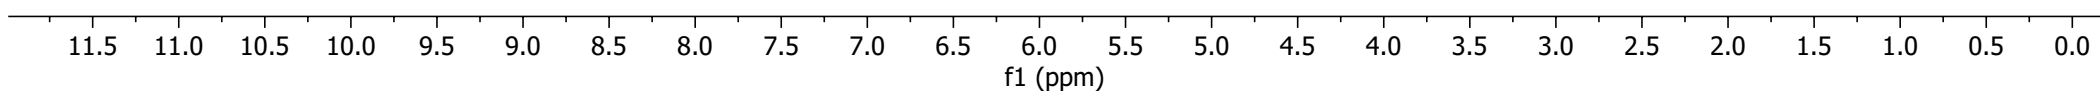

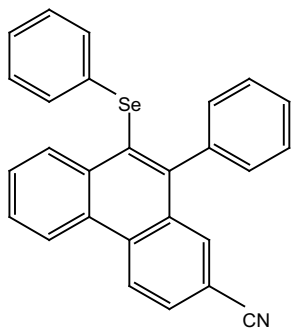

**2b**

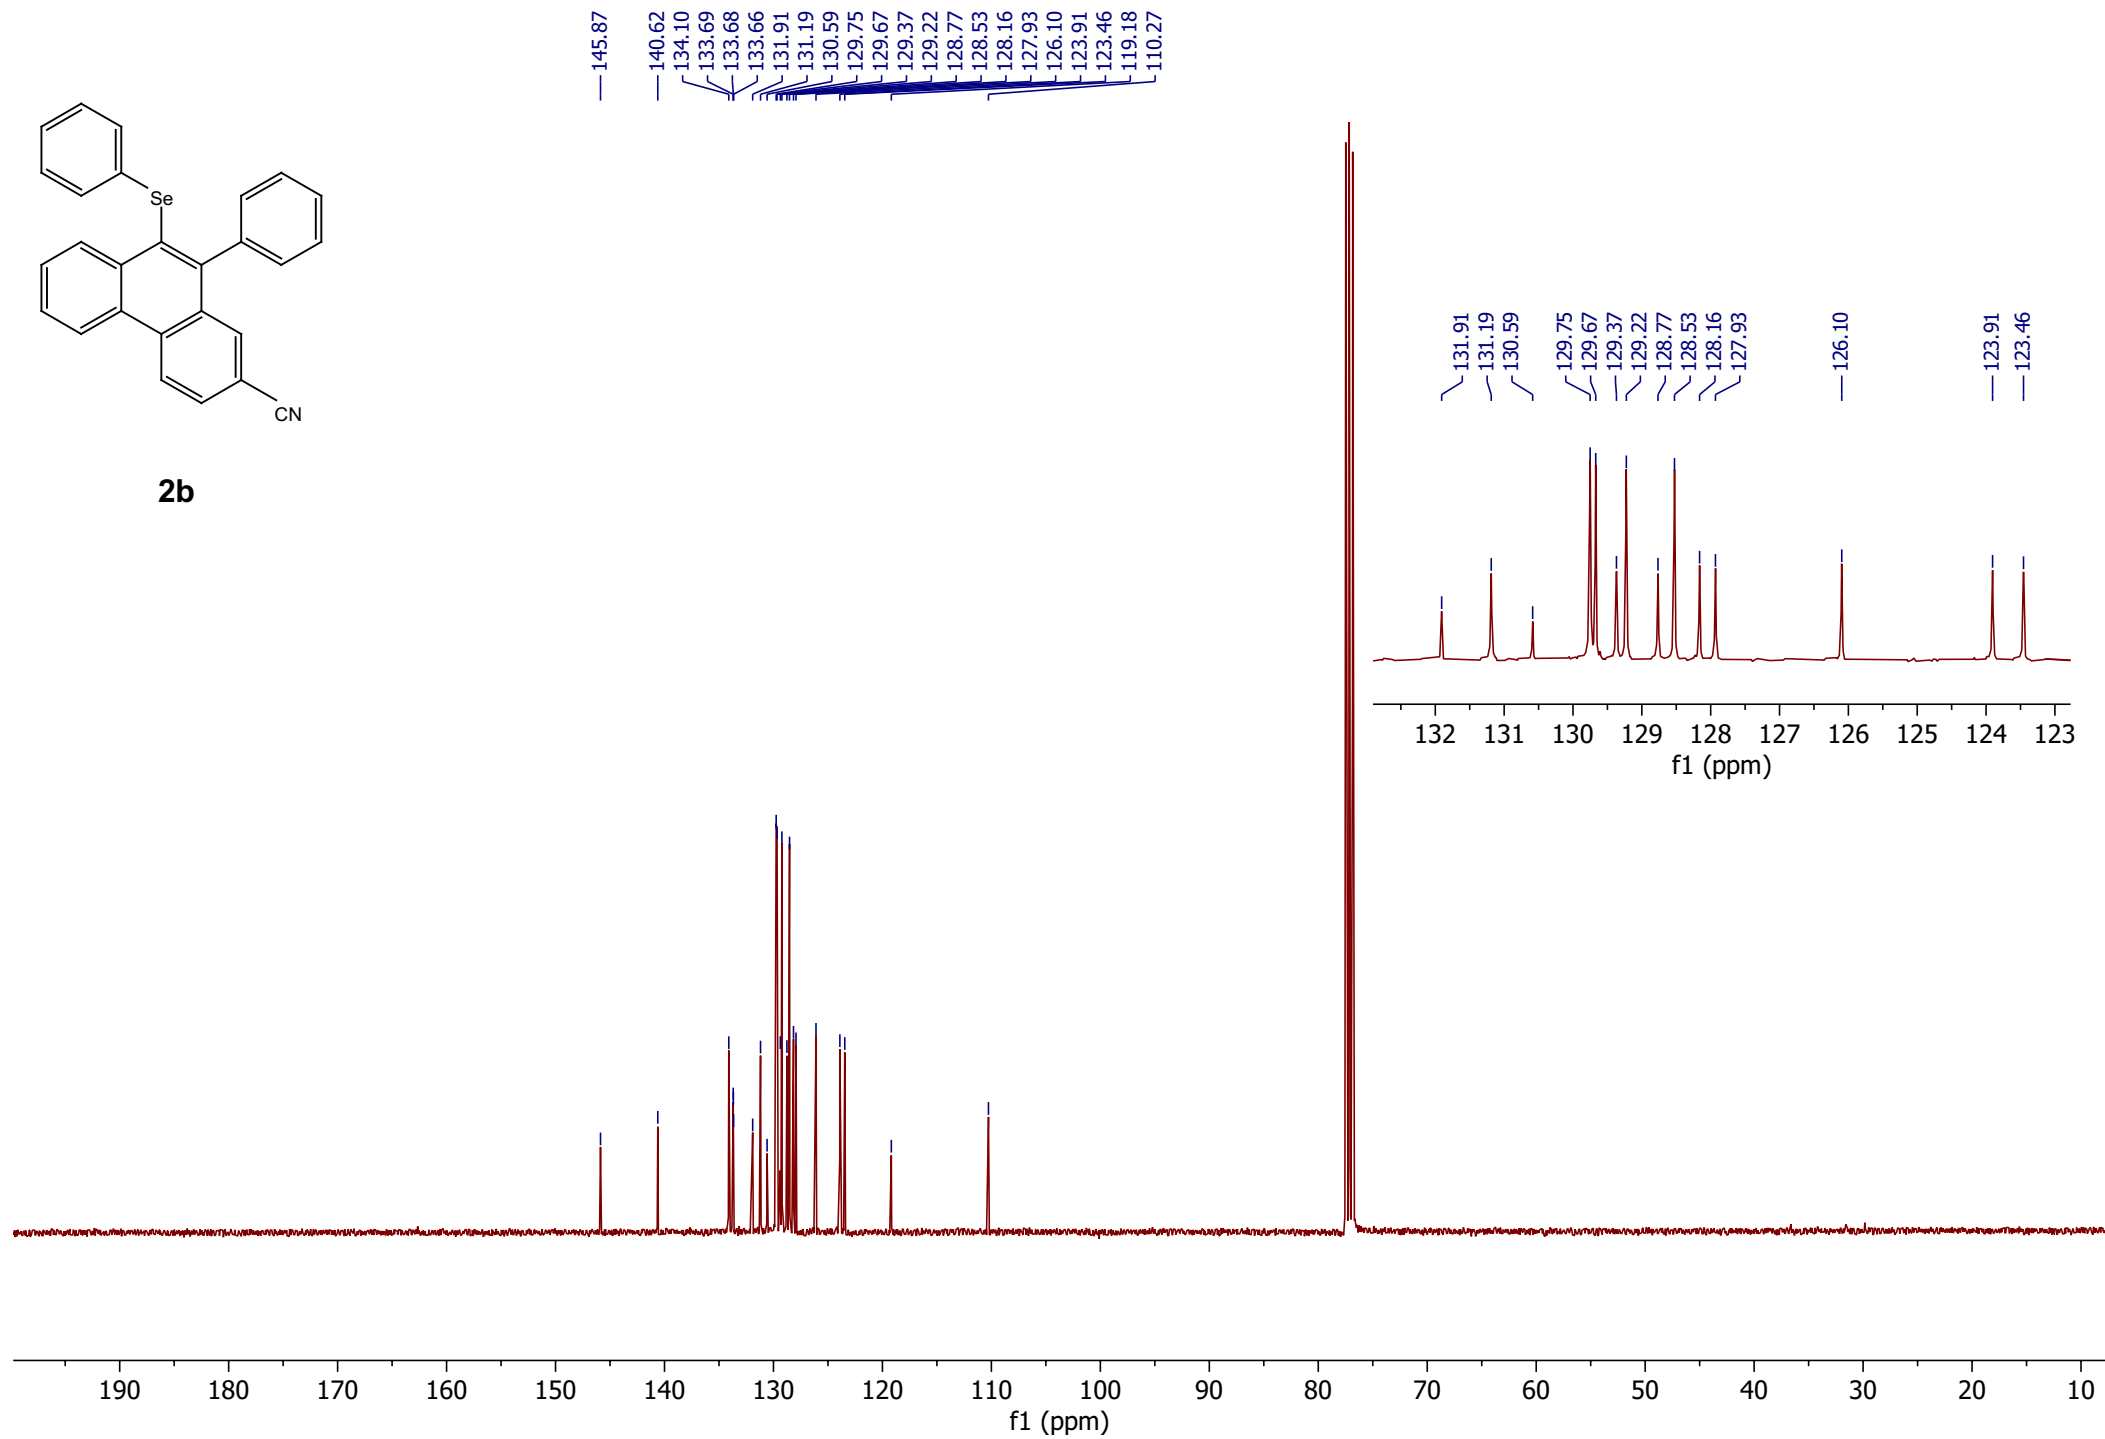

$^{77}\text{Se}$  NMR of **2b**

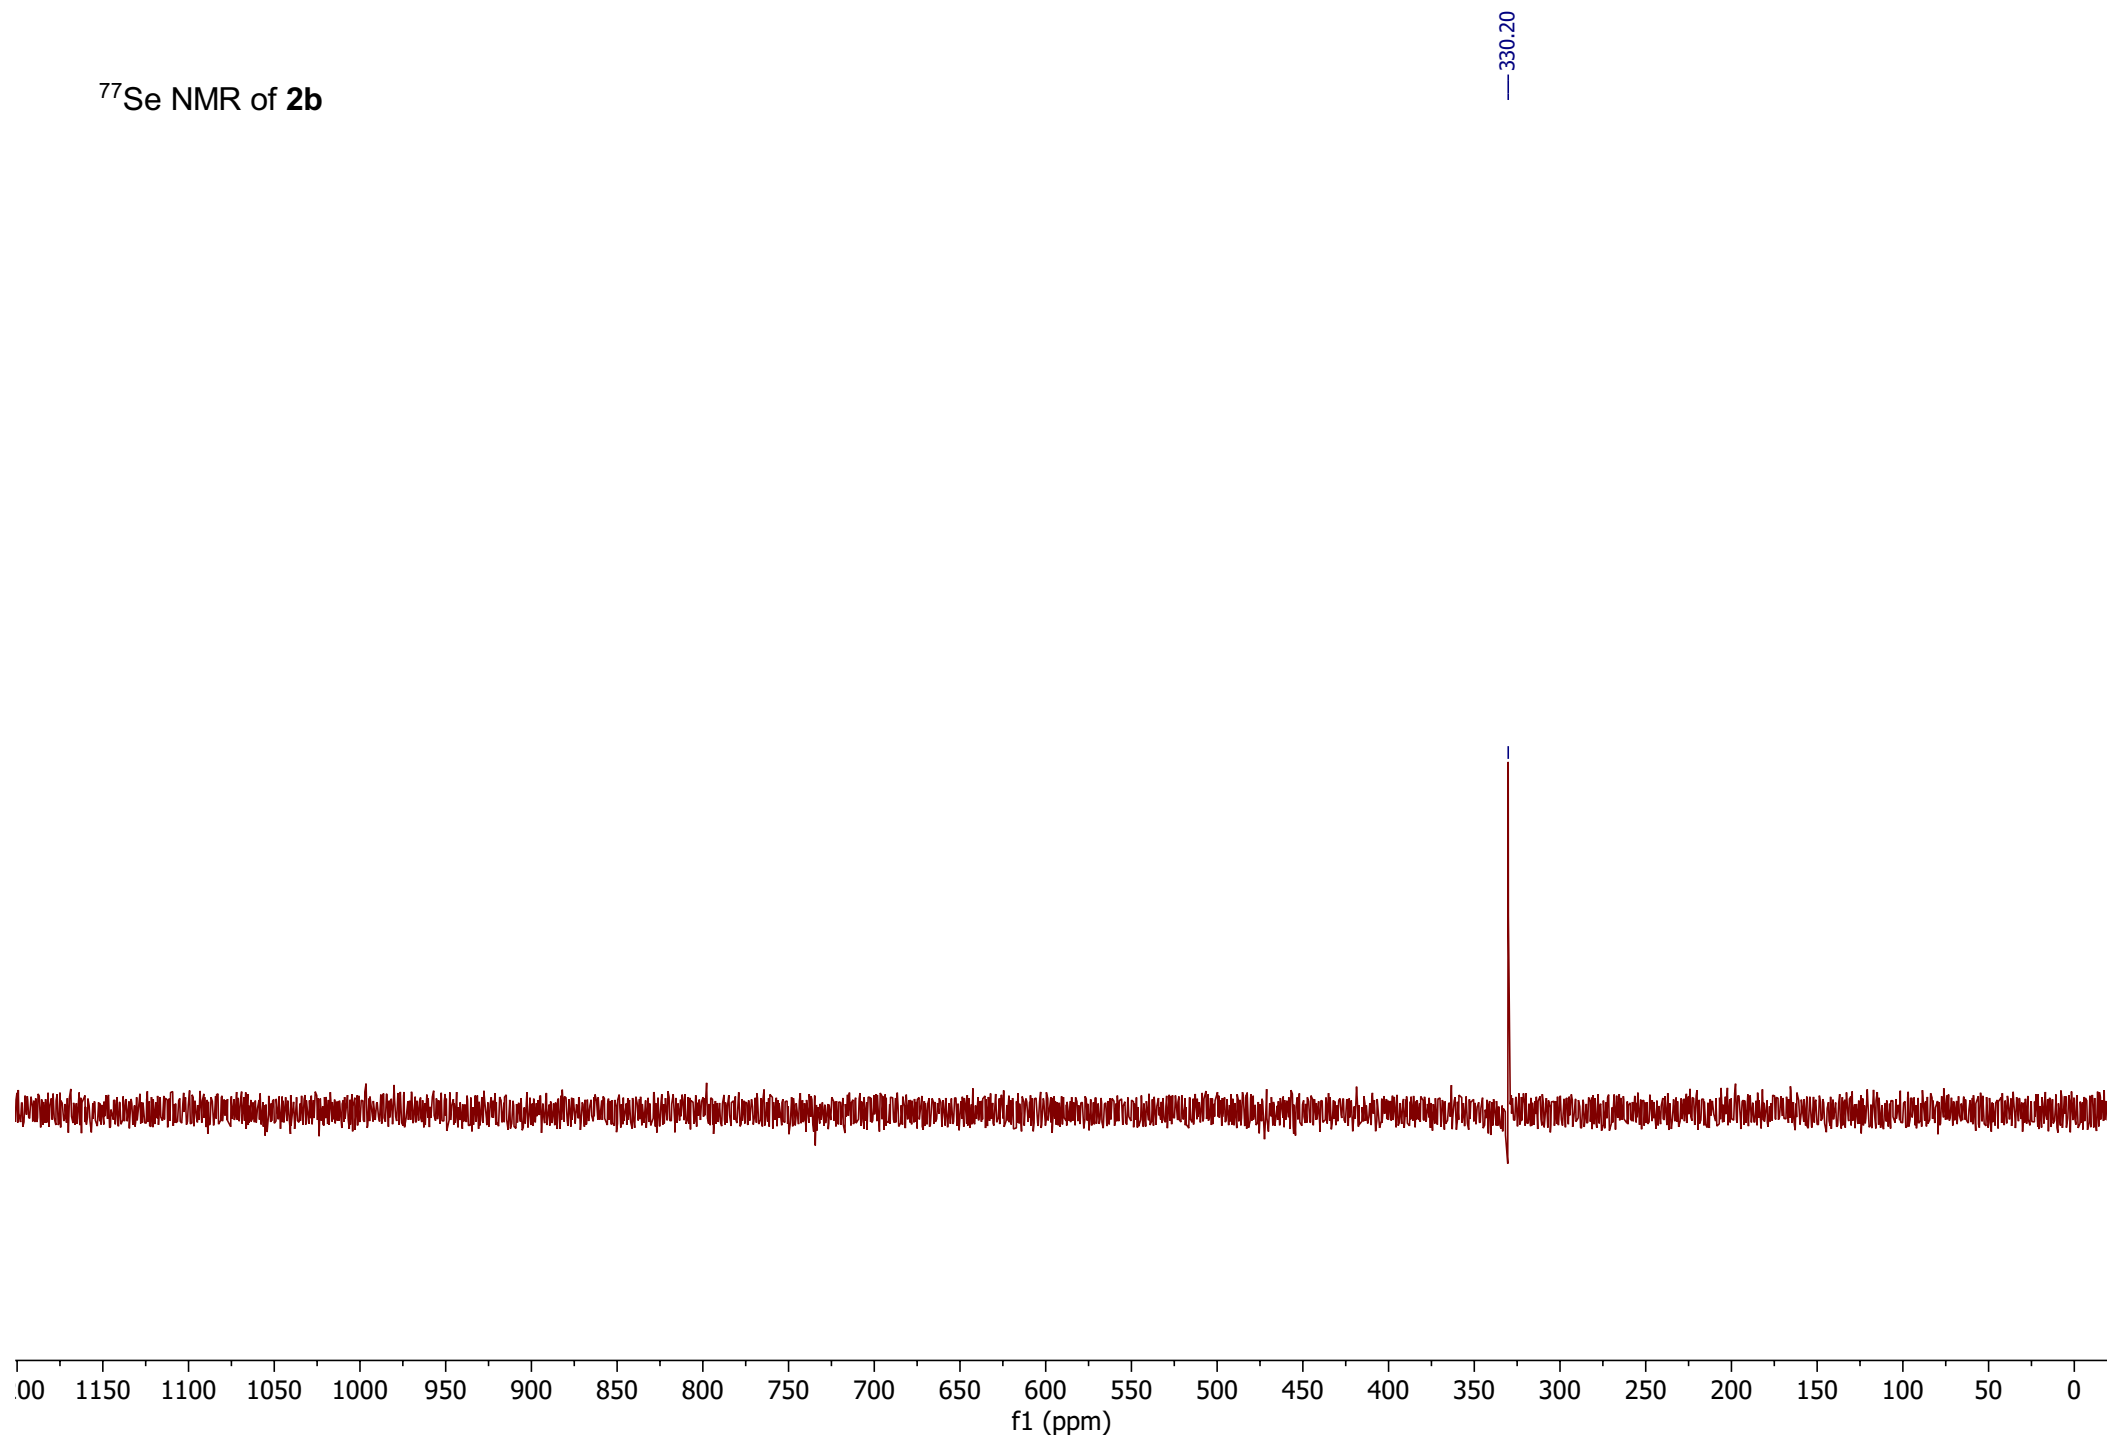

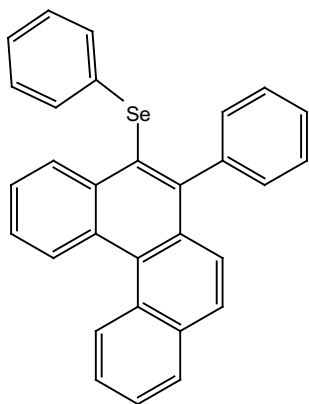

2c

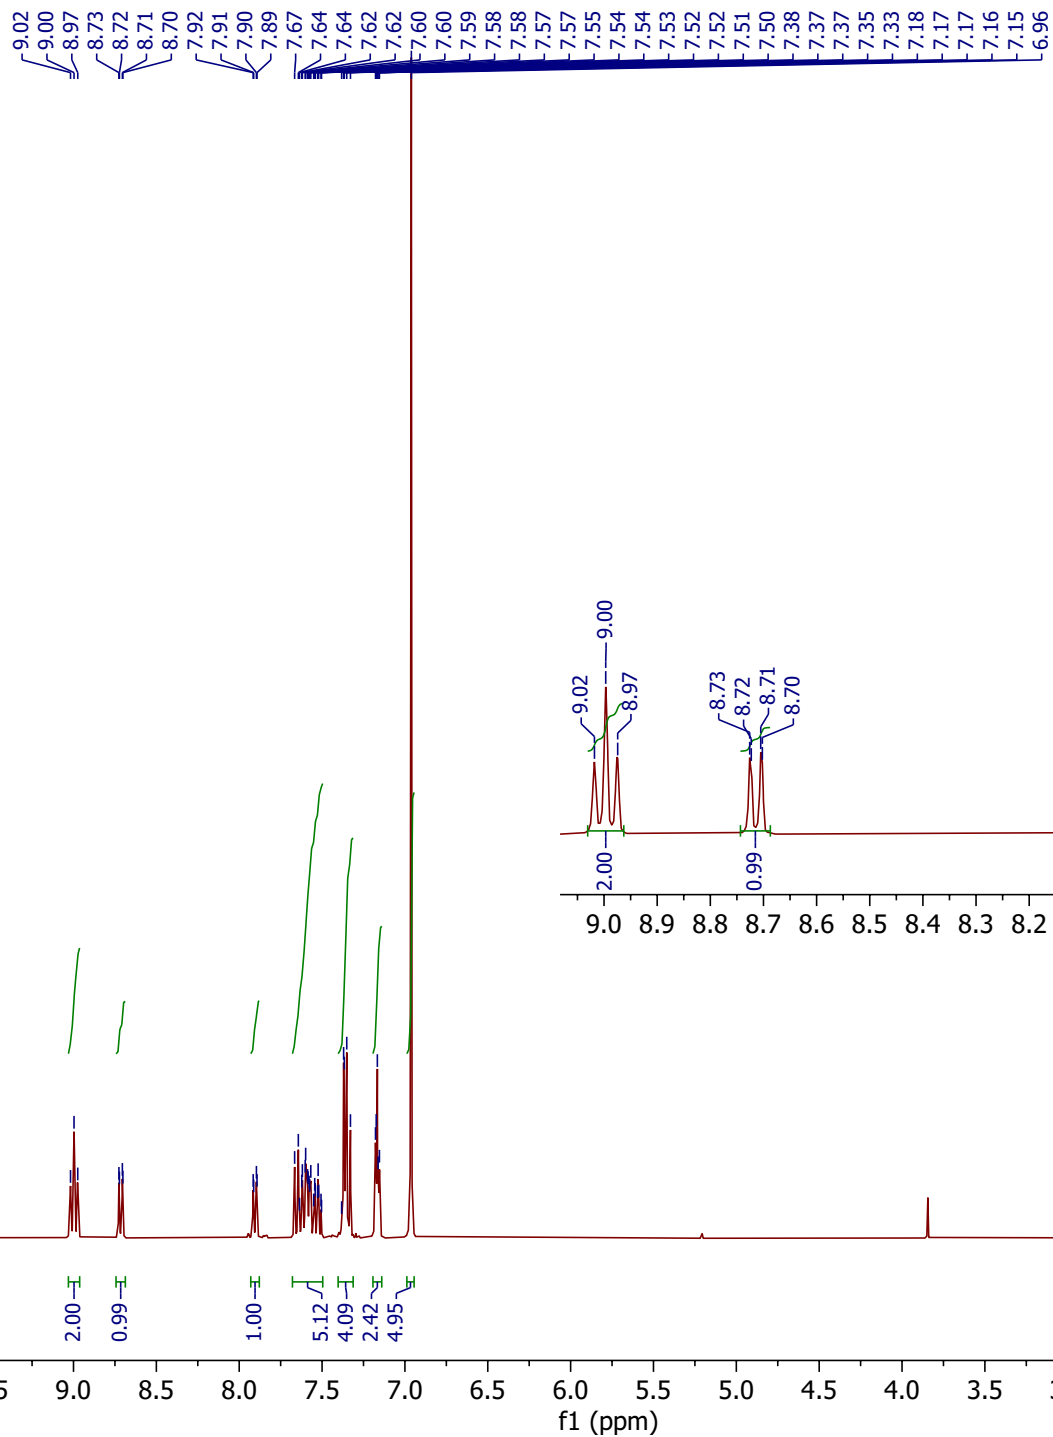



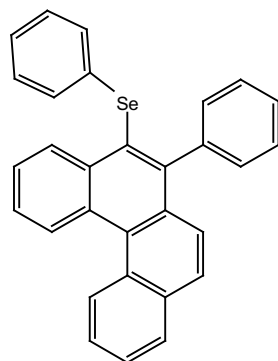

2c

146.18  
142.10  
134.40  
133.82  
133.62  
130.68  
130.43  
130.19  
130.16  
129.72  
129.61  
129.26  
129.09  
129.03  
128.74  
128.36  
128.14  
128.10  
127.56  
127.28  
127.20  
126.73  
126.39  
126.34  
125.87  
125.76

134.40  
133.82  
133.62

130.68  
130.43  
130.19  
130.16  
129.72  
129.61  
129.26  
129.09  
129.03  
128.74  
128.36  
128.14  
128.10  
127.56  
127.28  
127.20  
126.73  
126.39  
126.34  
125.87  
125.76

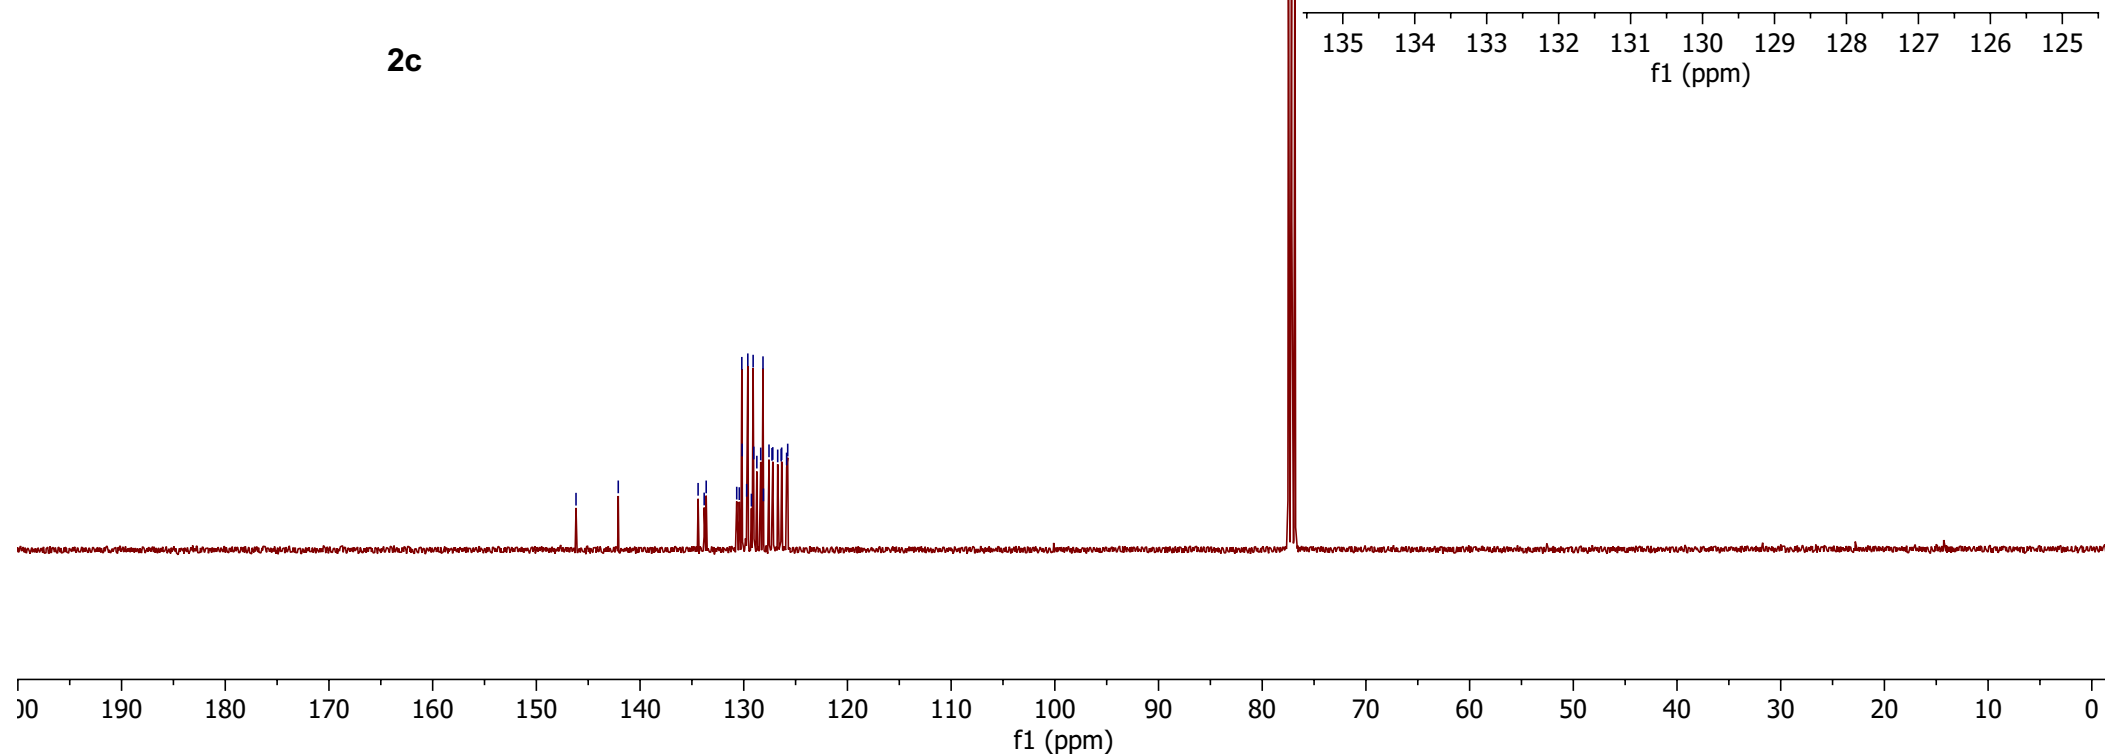

<sup>77</sup>Se NMR of 2c

— 319.32

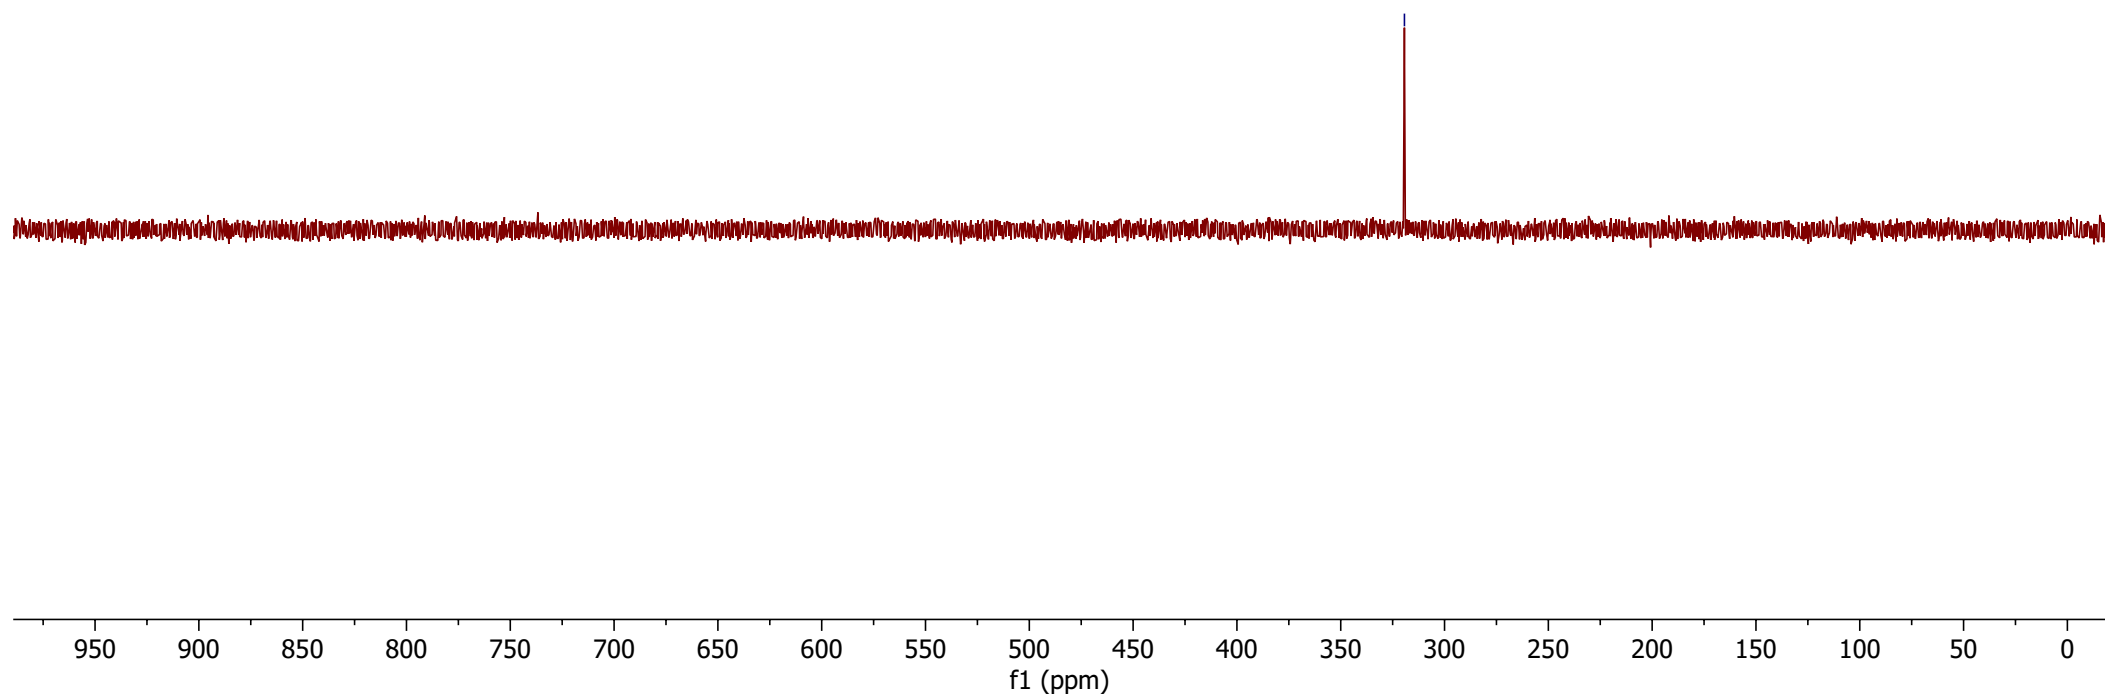

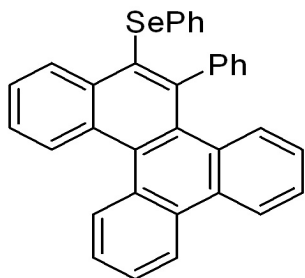

2d

8.77  
8.75  
8.73  
8.71  
8.69  
8.67  
8.65  
8.57  
8.55  
7.75  
7.73  
7.71  
7.70  
7.68  
7.66  
7.58  
7.55  
7.52  
7.50  
7.47  
7.44  
7.40  
7.37  
7.34  
7.32  
7.10  
7.08  
7.04  
7.02

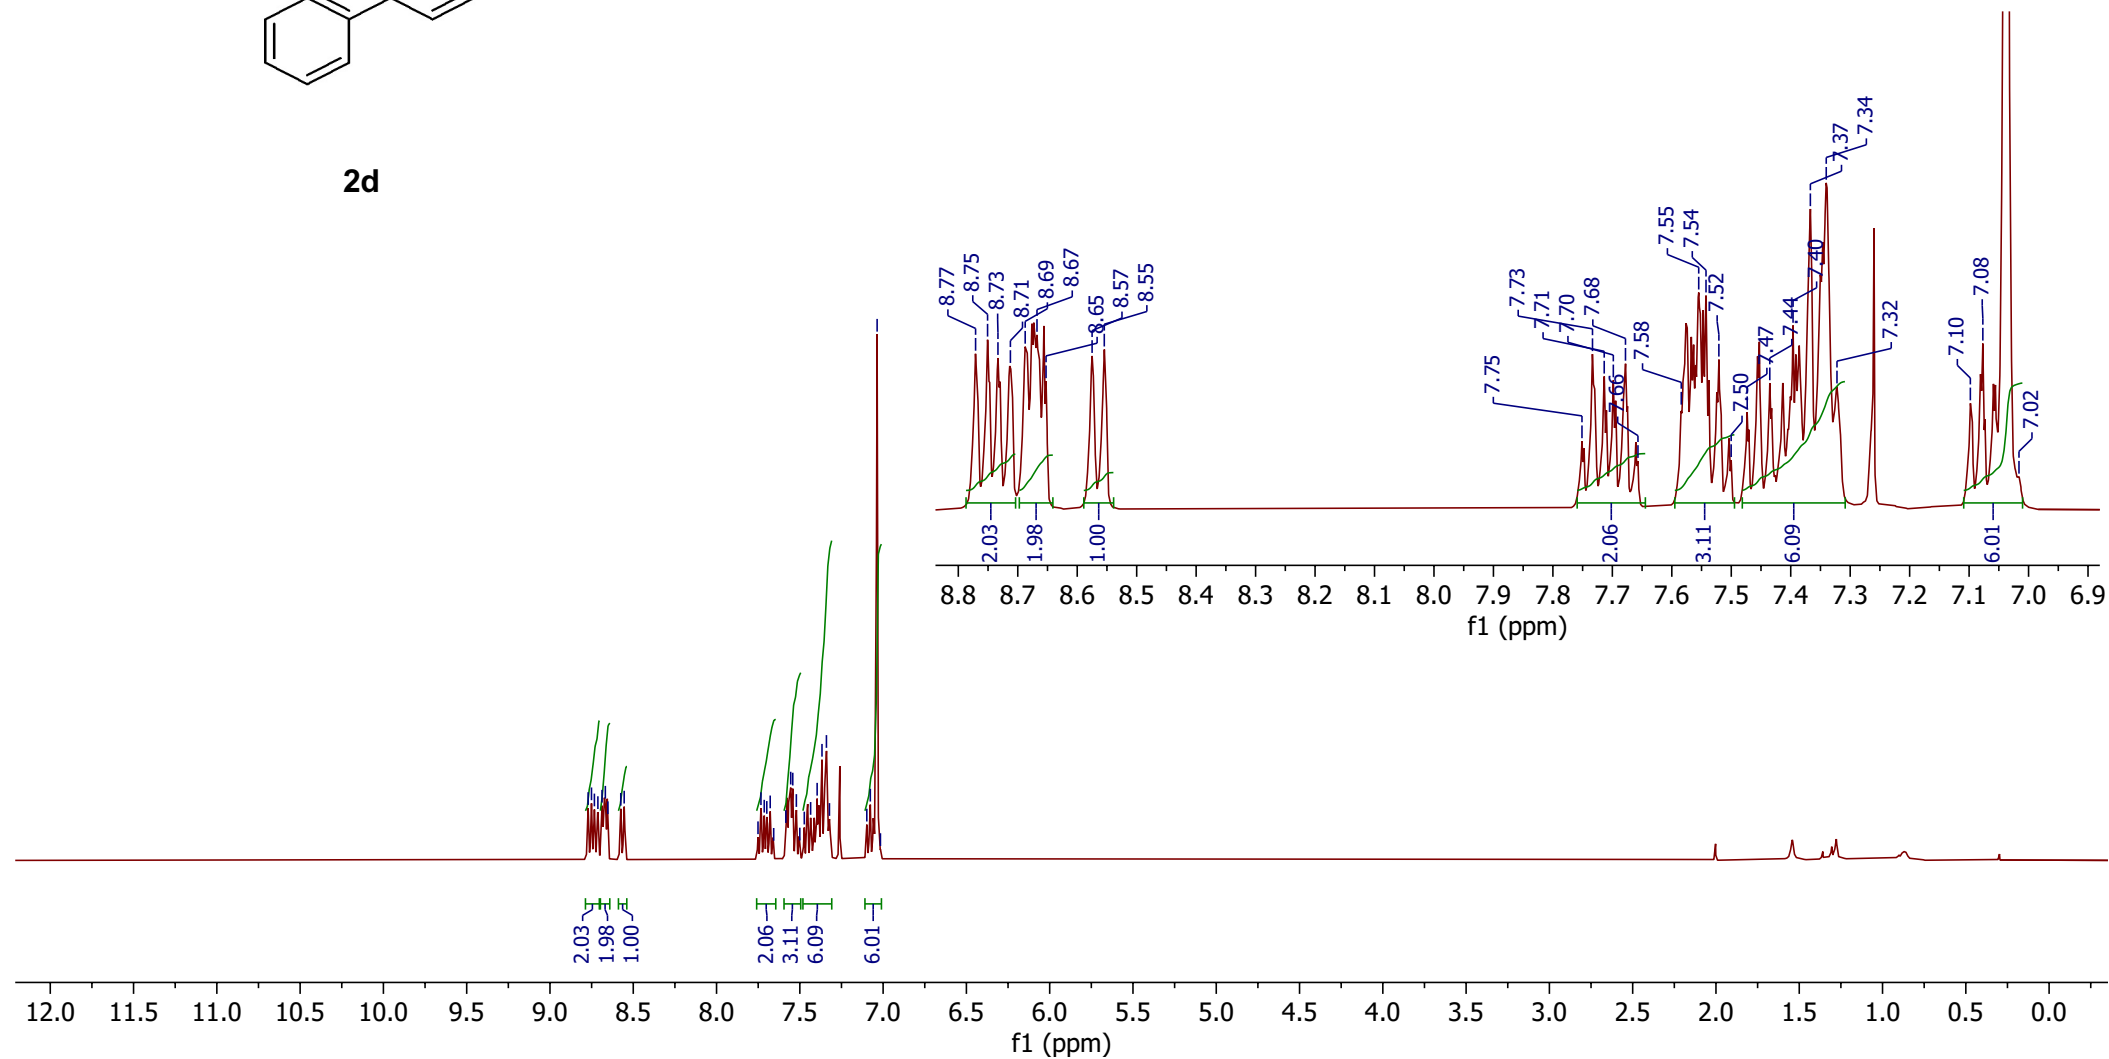

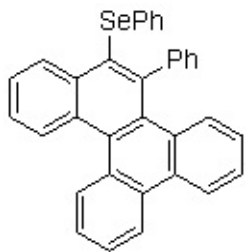

2d

144.72  
143.54  
134.67  
133.94  
131.61  
131.56  
131.47  
130.85  
130.43  
130.28  
130.10  
130.04  
130.01  
129.71  
129.44  
129.33  
129.07  
128.85  
128.27  
128.05  
127.75  
127.41  
127.12  
126.67  
126.38  
126.14  
125.87  
125.78  
123.72  
123.20

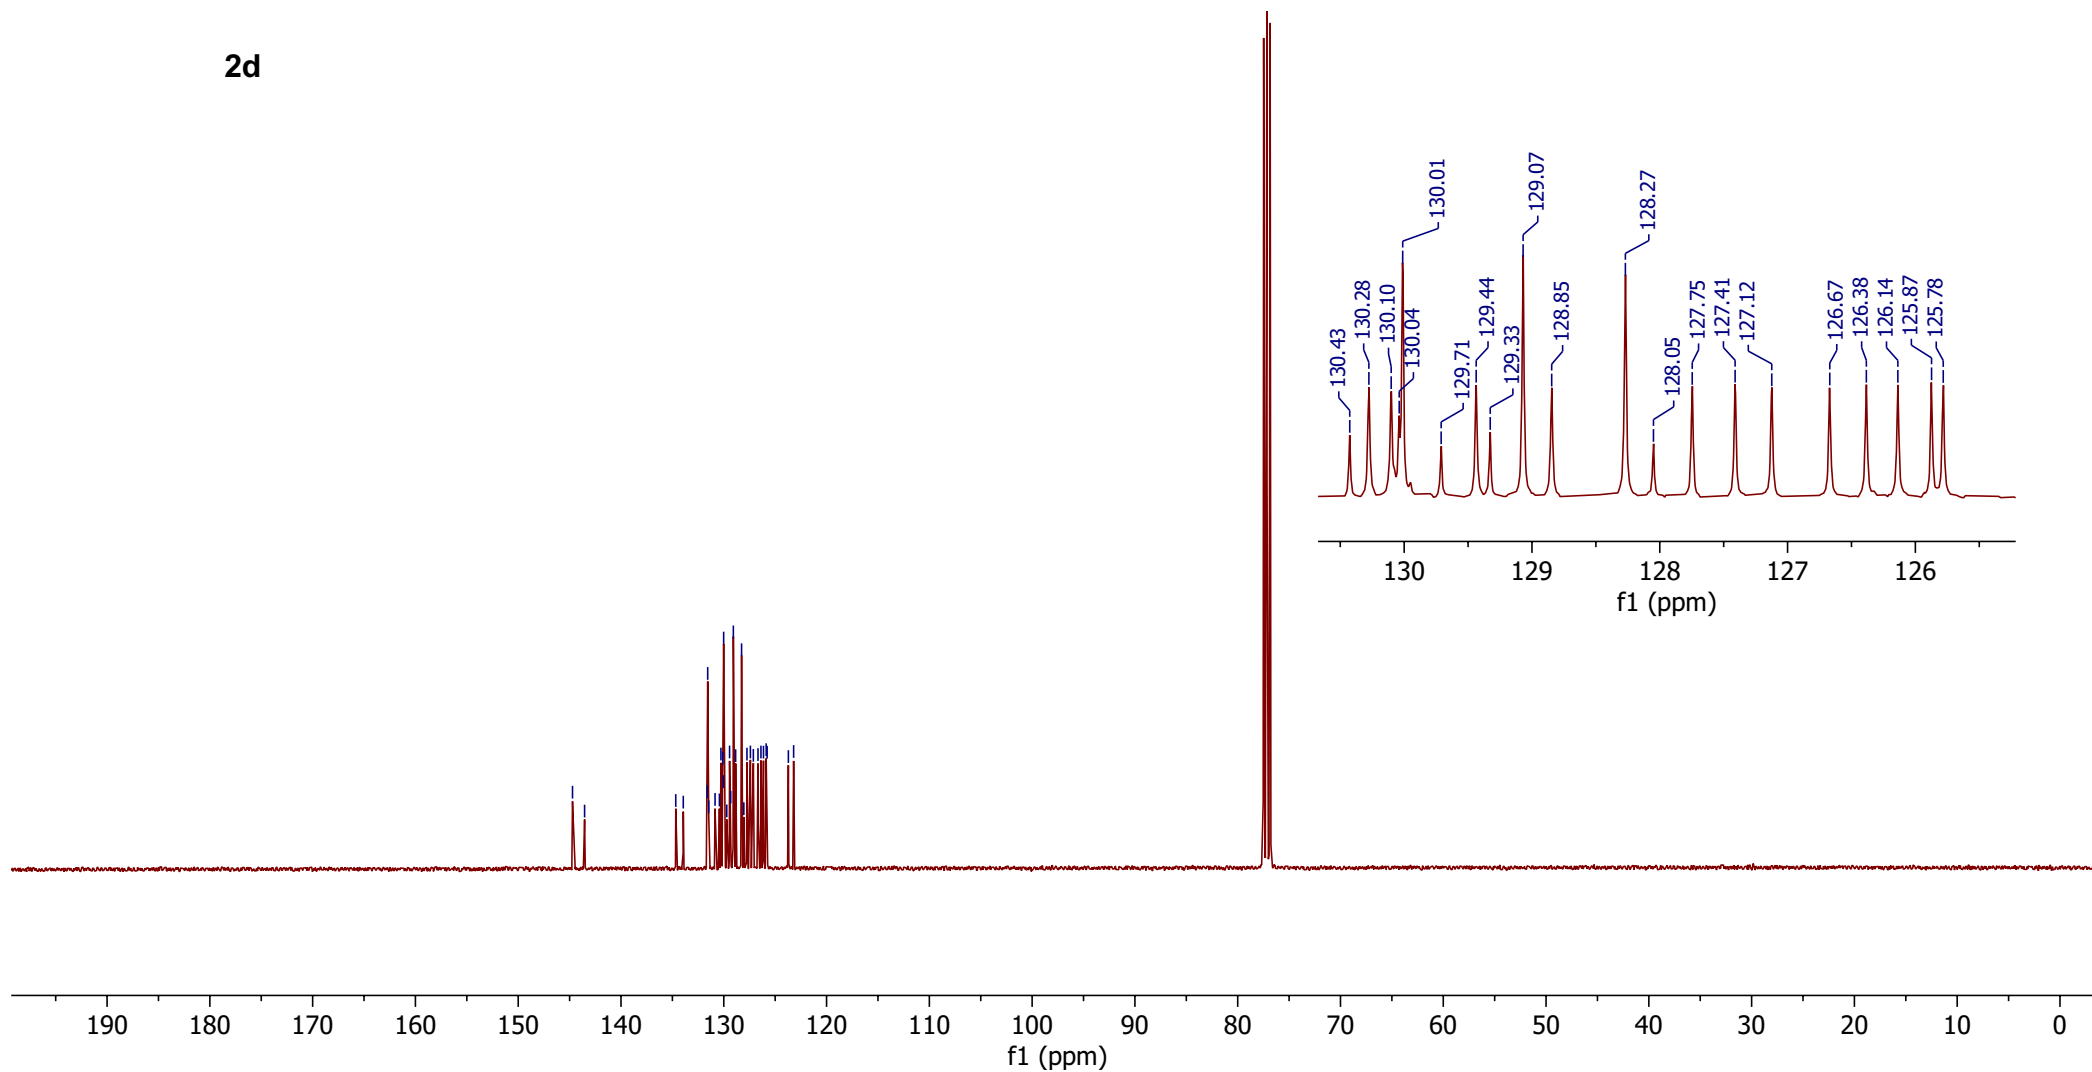

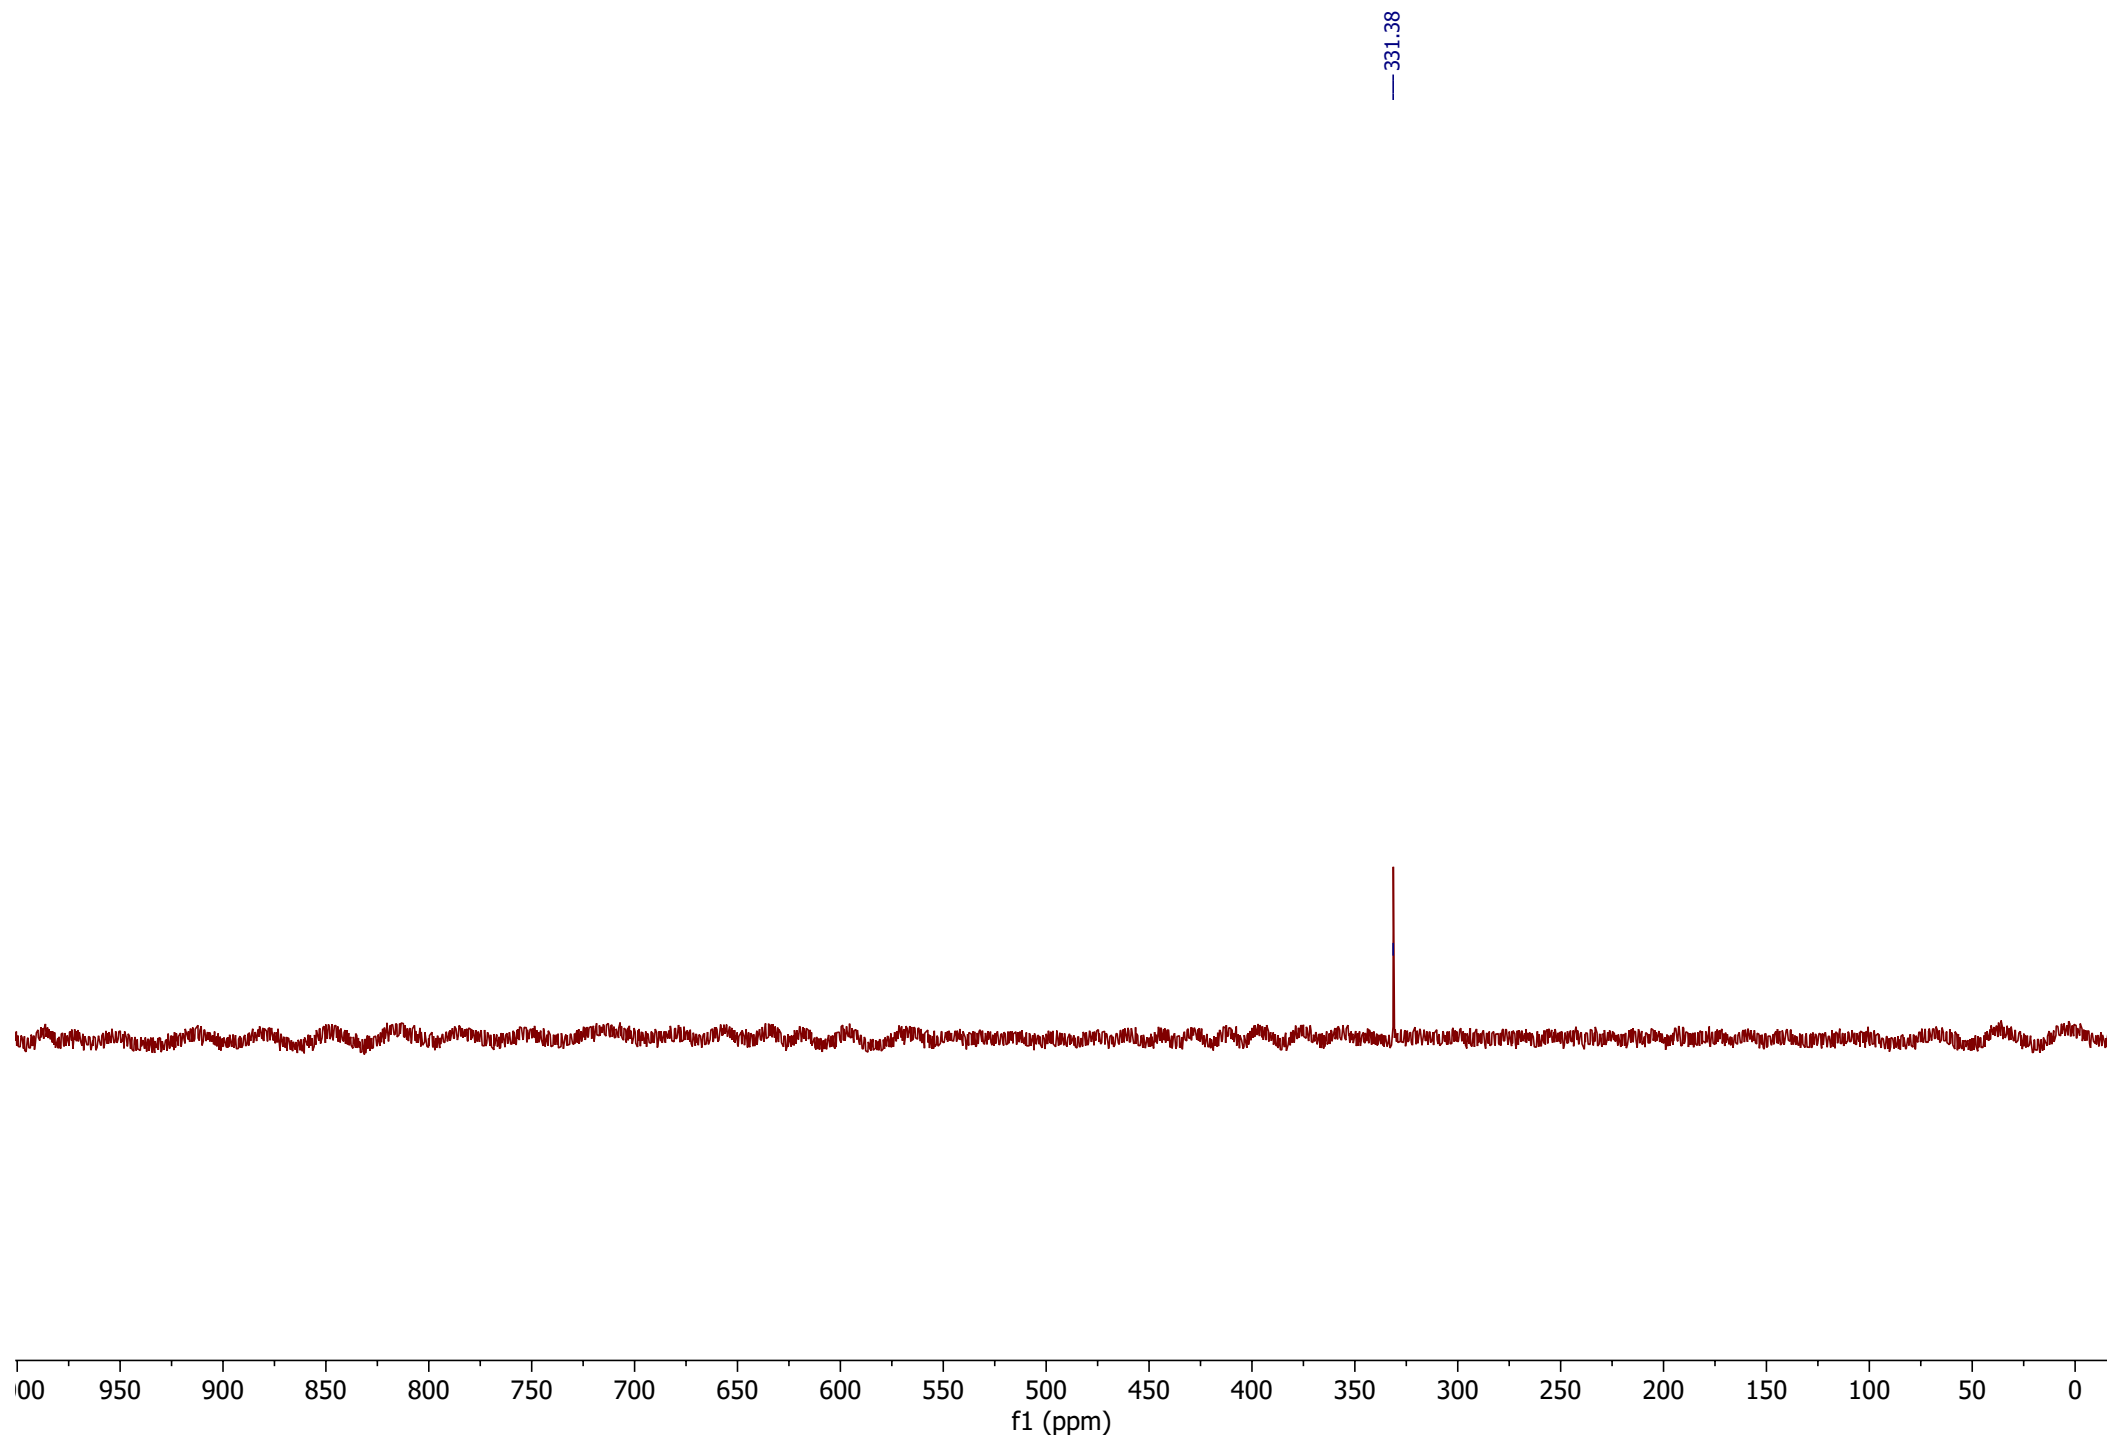

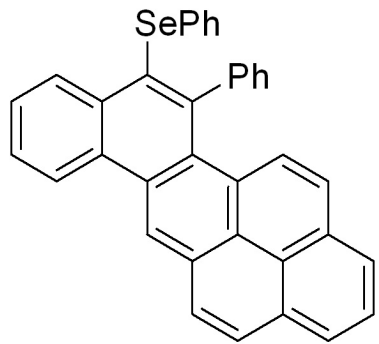

2e

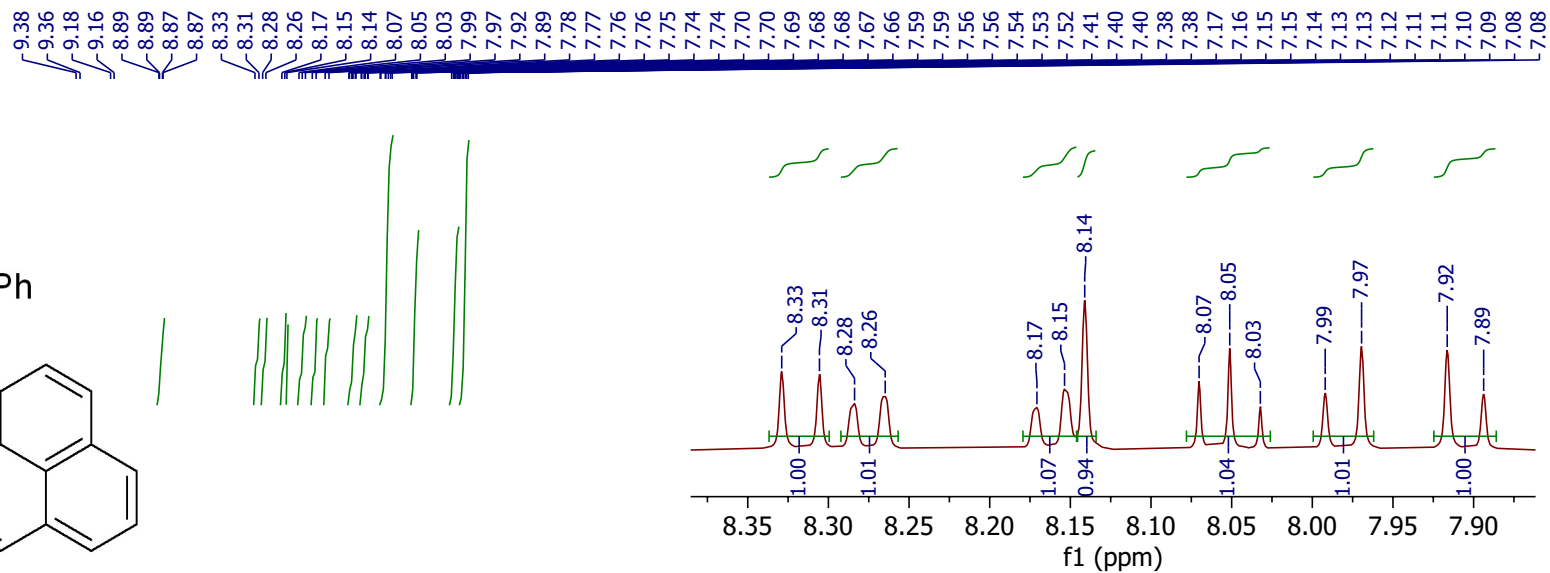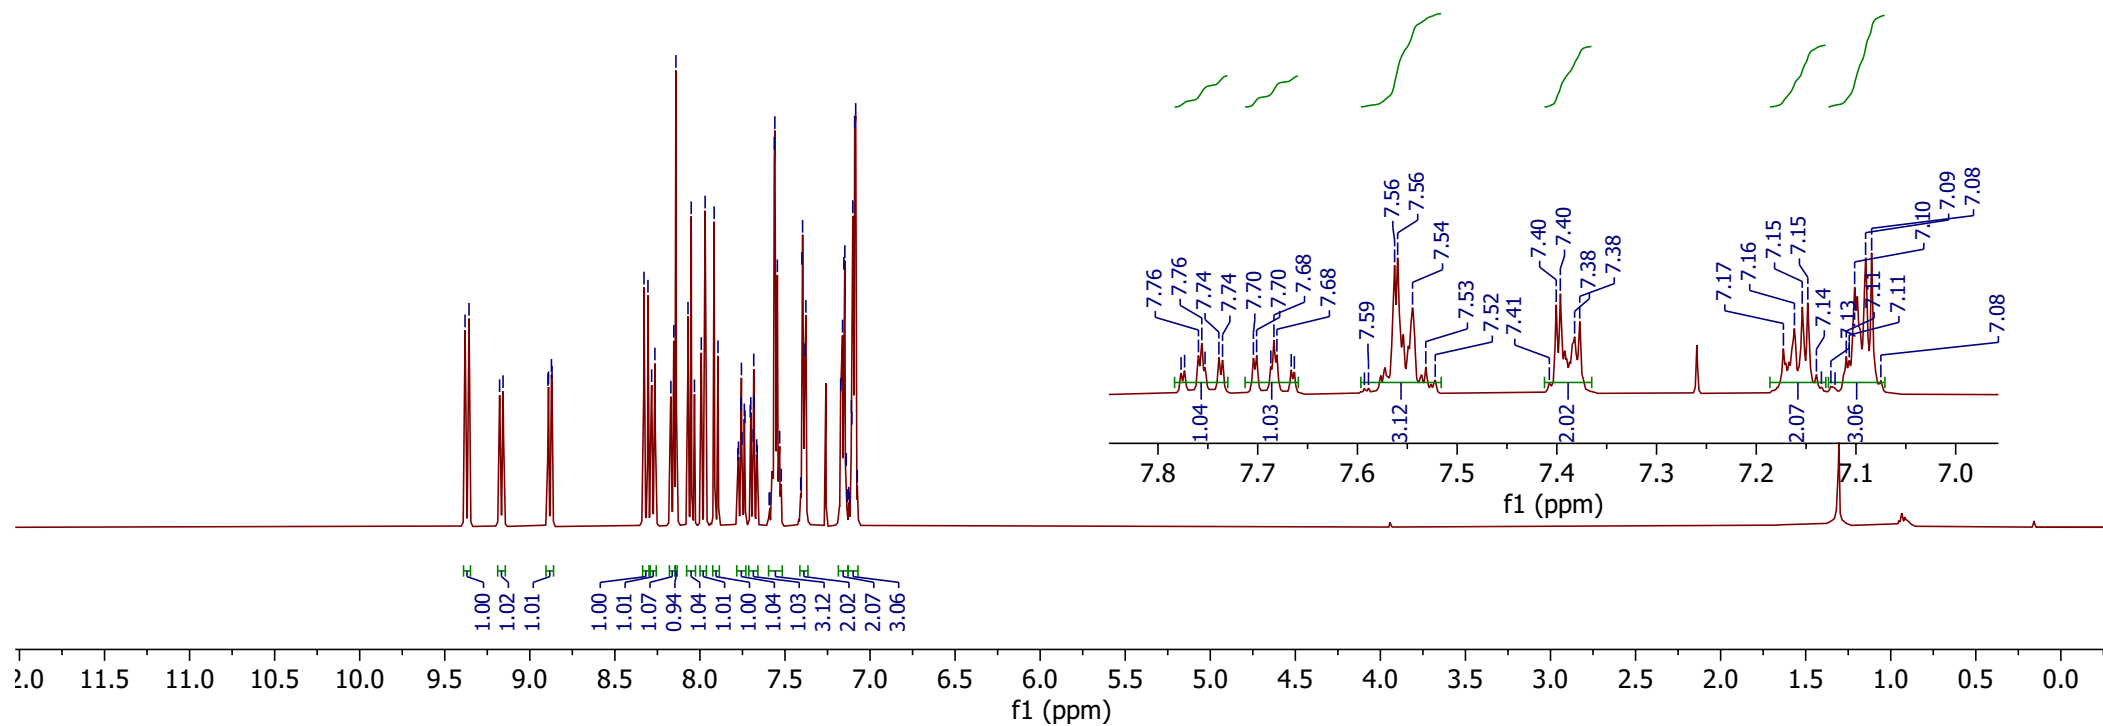

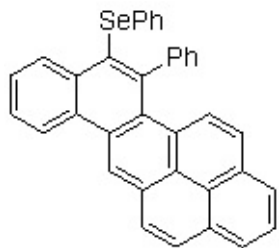

2e

- 146.54
- 142.16
- 134.32
- 133.21
- 131.80
- 131.10
- 130.74
- 130.38
- 130.15
- 130.12
- 129.75
- 129.70
- 129.55
- 129.13
- 128.28
- 128.24
- 128.18
- 128.01
- 127.73
- 127.48
- 127.34
- 127.28
- 126.90
- 126.54
- 126.41
- 126.28
- 125.80
- 125.34
- 125.12
- 124.92
- 124.91
- 124.48

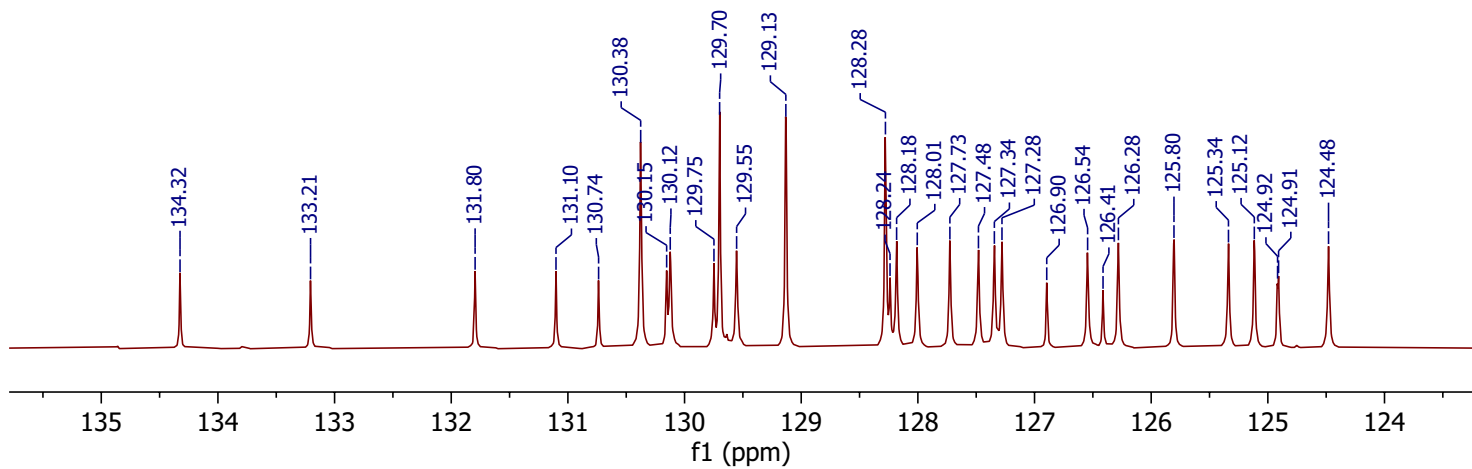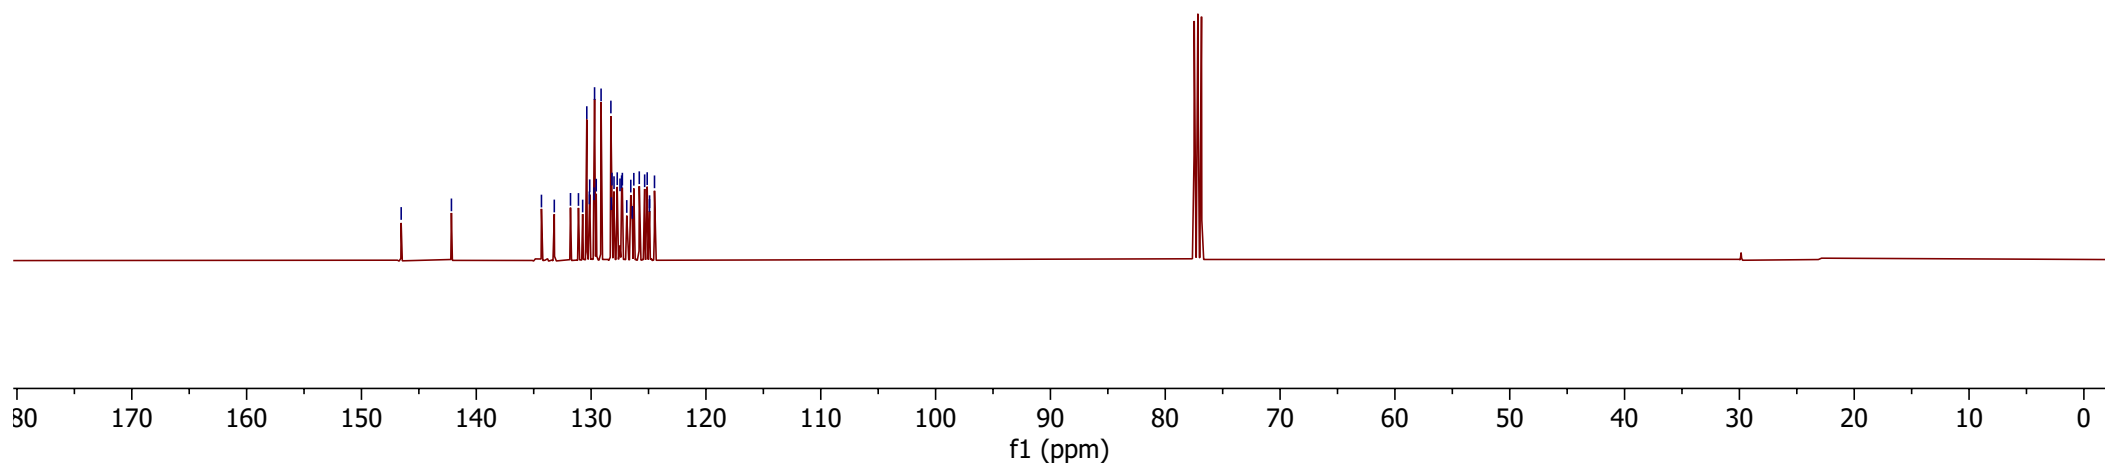

<sup>77</sup>Se NMR of 2e

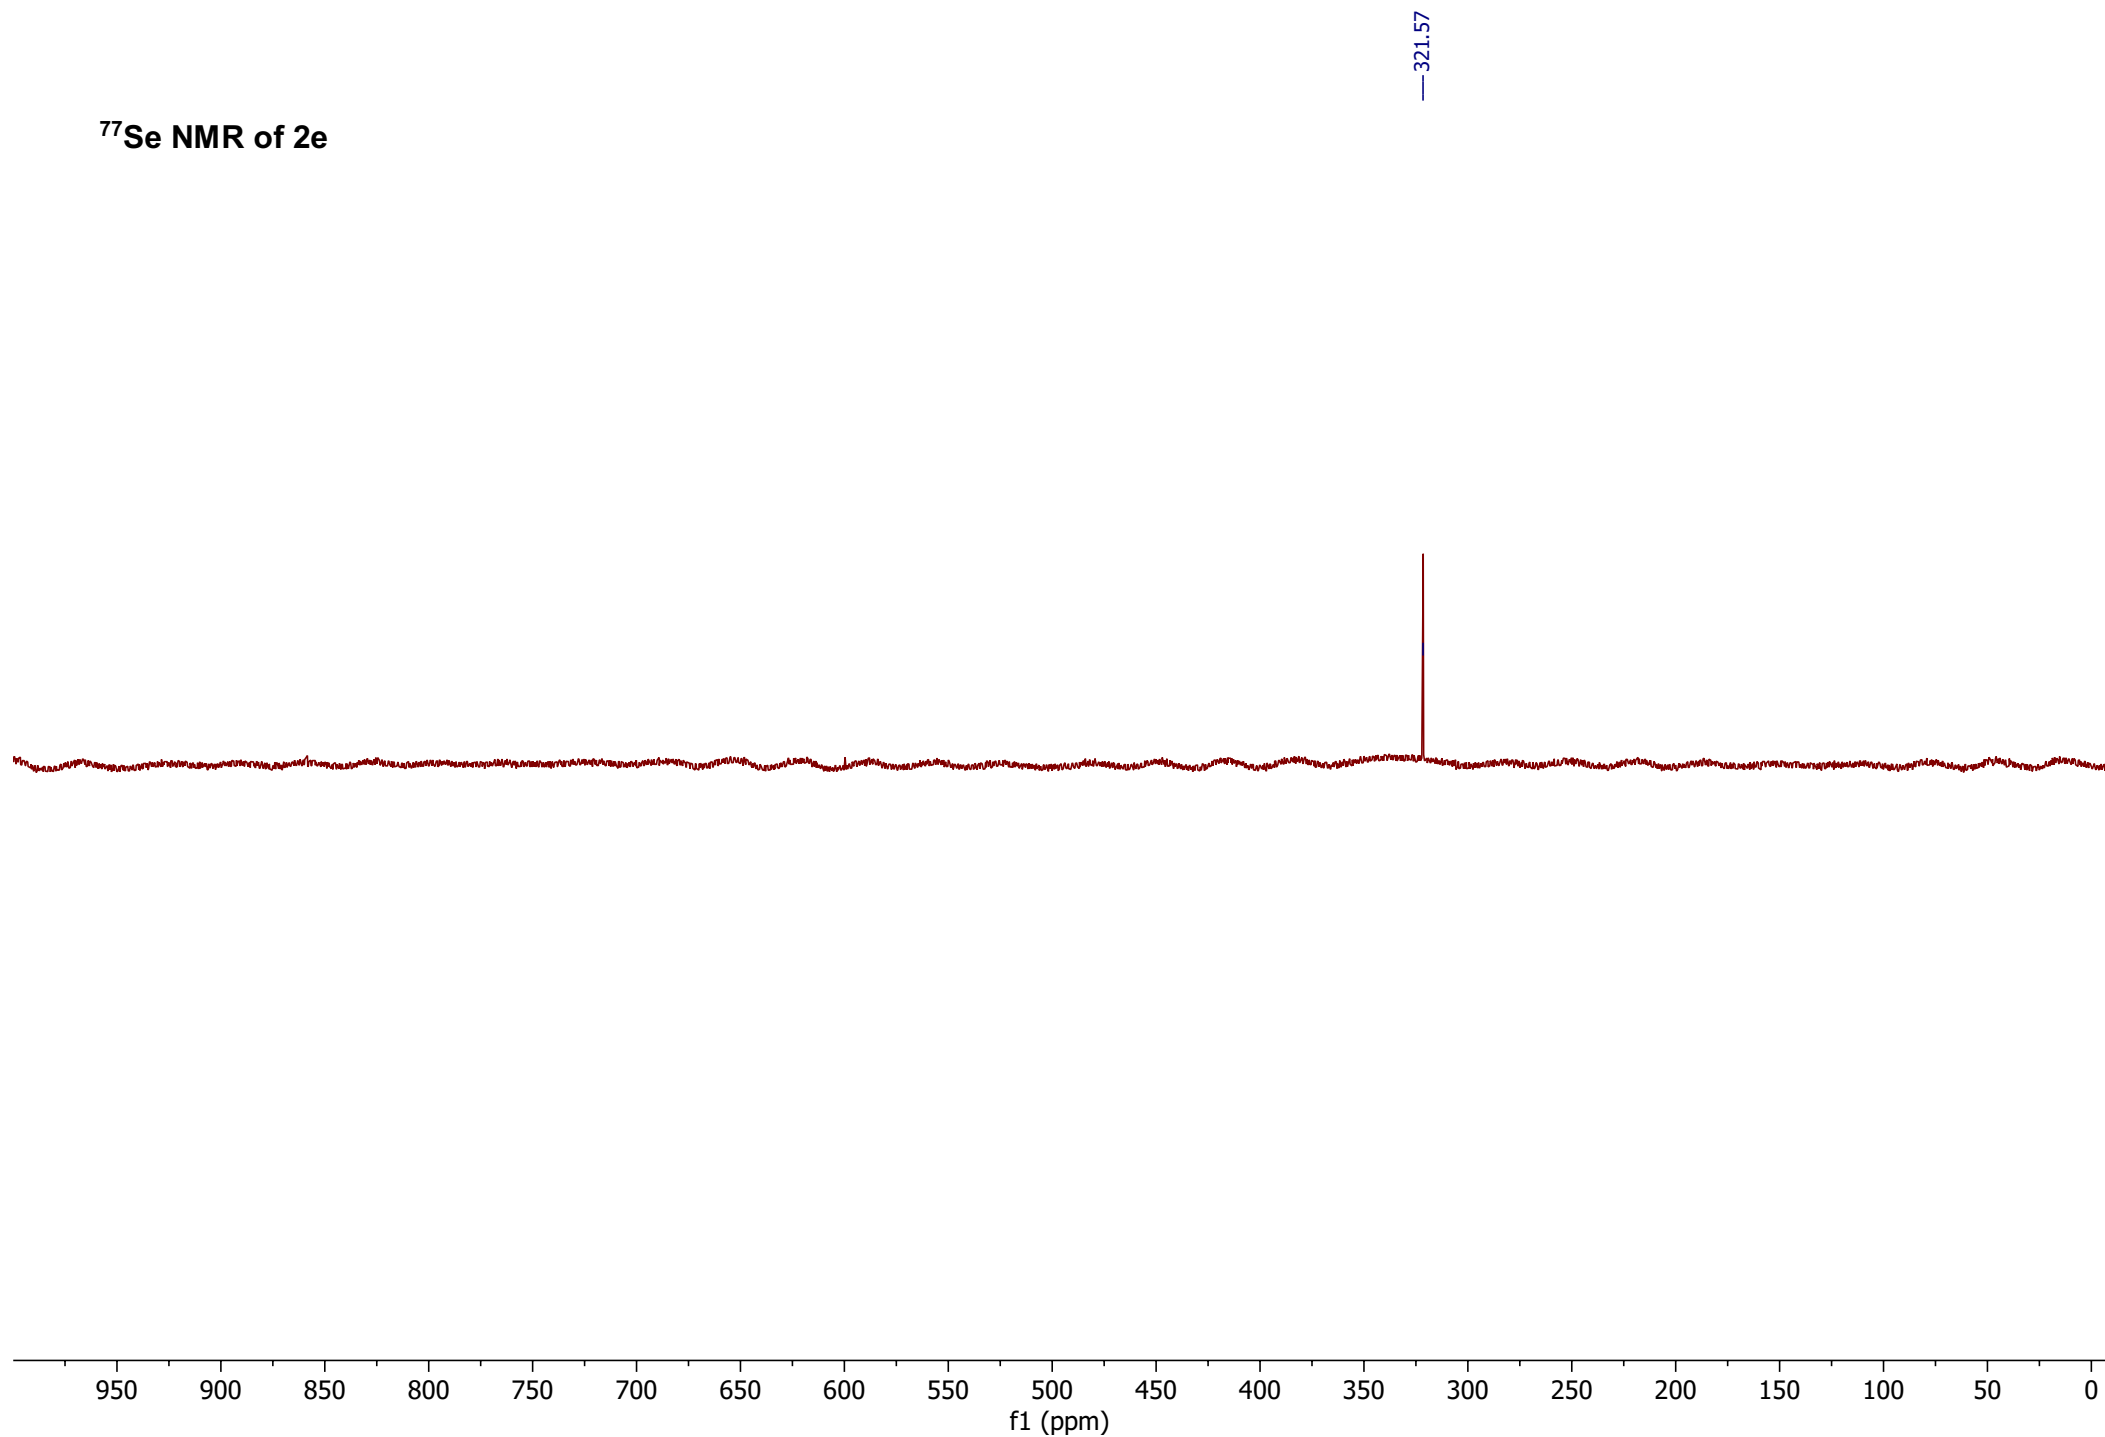



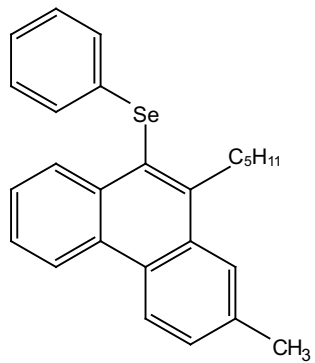

**2f**

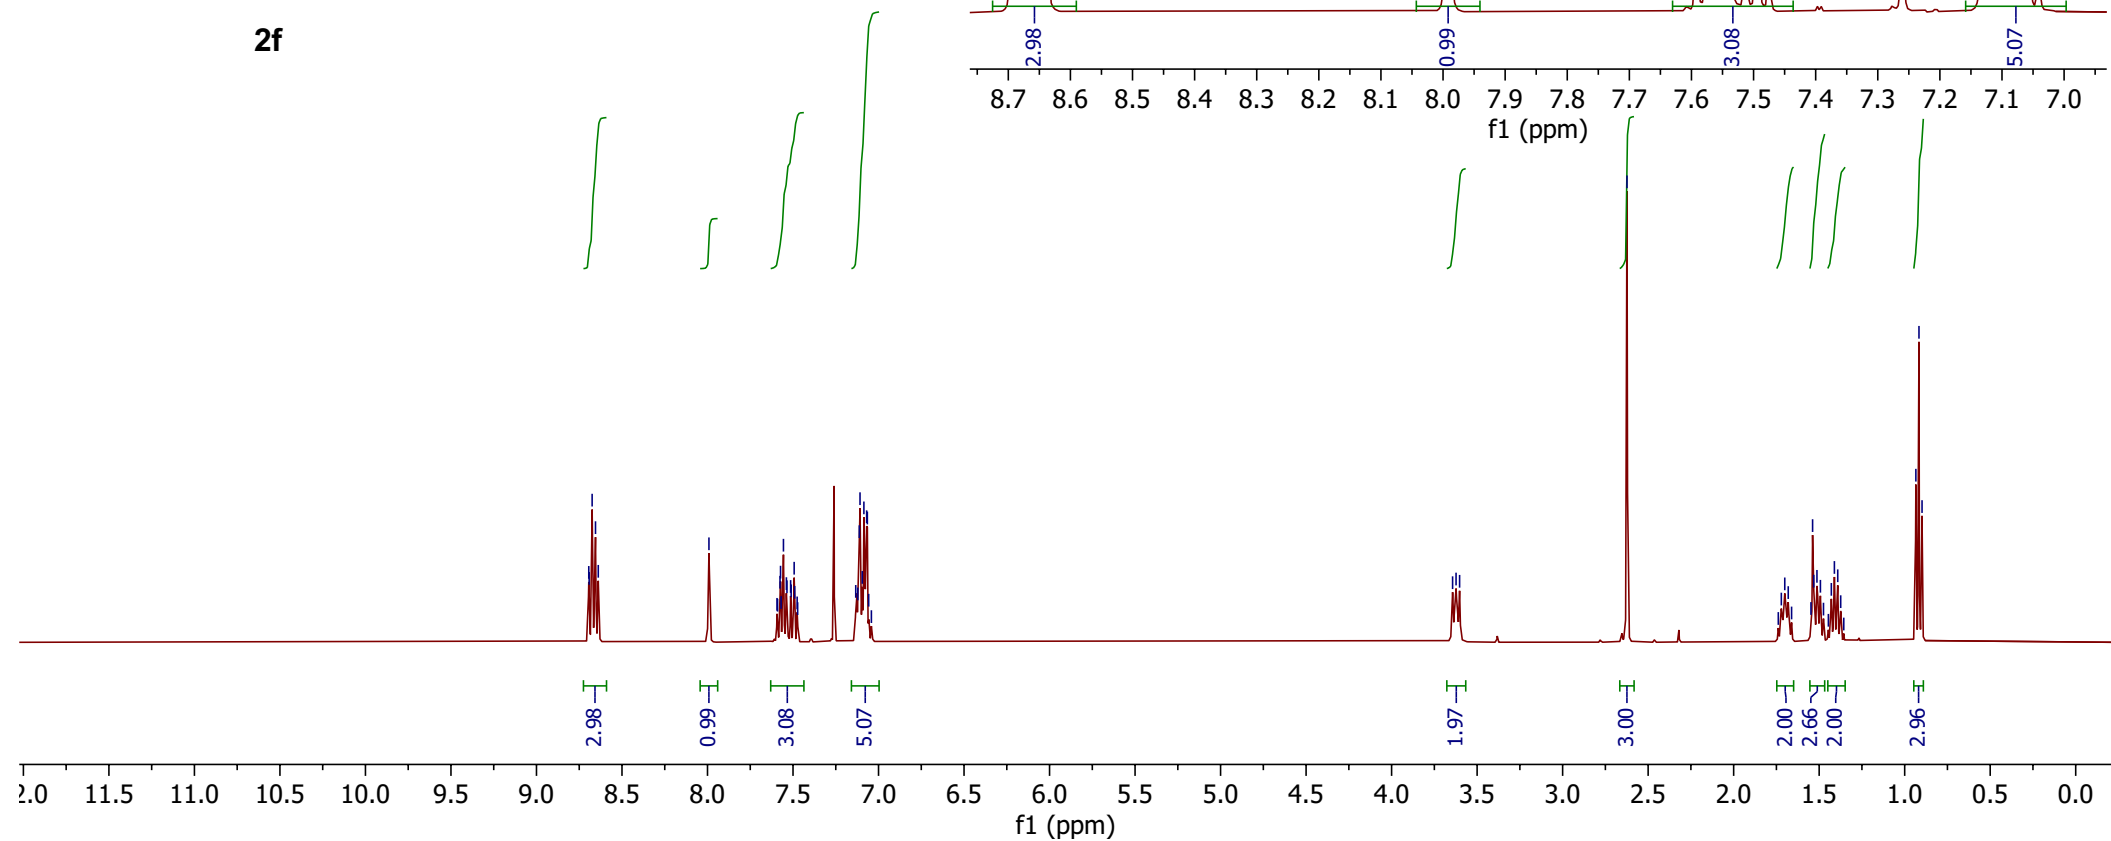

8.69  
8.69  
8.67  
8.65  
8.64

7.99  
7.59  
7.59  
7.58  
7.57  
7.57  
7.56  
7.54  
7.54  
7.51  
7.51  
7.49  
7.49  
7.48  
7.47  
7.13  
7.11  
7.11  
7.10  
7.10  
7.09  
7.07  
7.07  
7.06  
7.04

3.64  
3.62  
3.60

2.62  
1.74  
1.72  
1.70  
1.68  
1.66  
1.55  
1.54  
1.53  
1.51  
1.49  
1.47  
1.45  
1.43  
1.41  
1.39  
1.37  
0.92  
0.92  
0.92

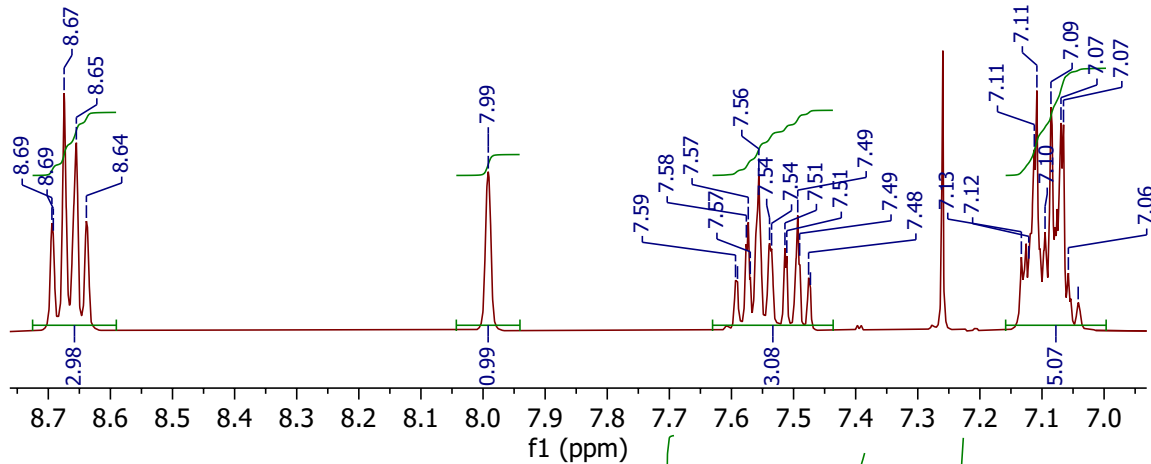

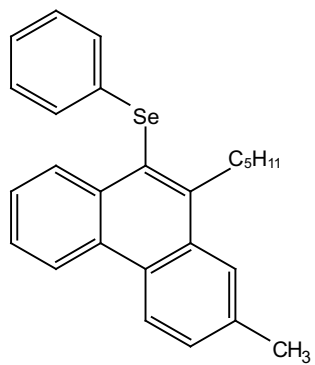

**2f**

145.17  
136.81  
134.05  
132.93  
131.08  
130.63  
130.40  
129.47  
129.23  
129.12  
128.79  
127.51  
127.06  
126.39  
125.95  
125.58  
123.28  
122.49

35.27  
32.42  
31.00  
22.63  
22.12  
14.22

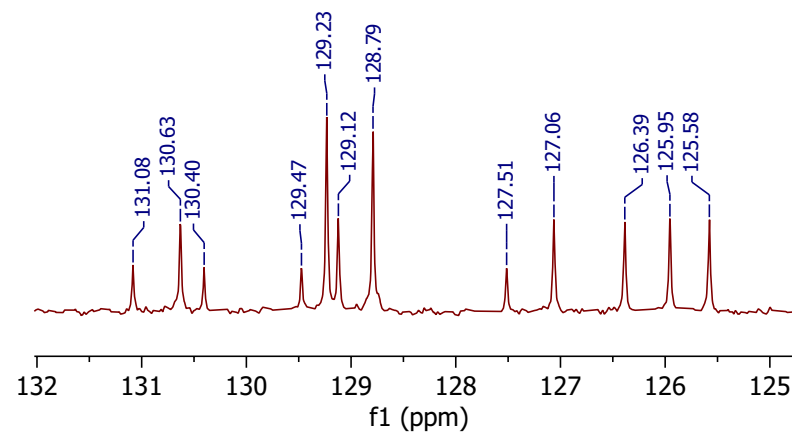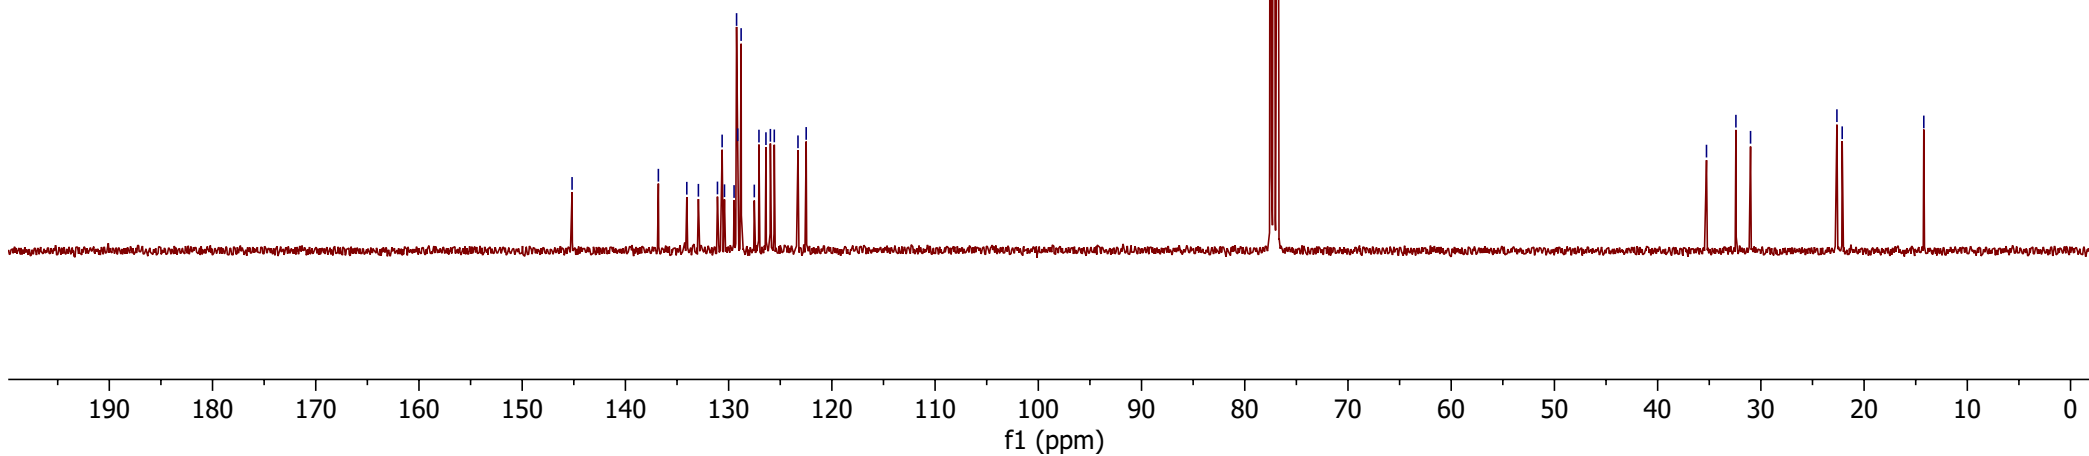

<sup>77</sup>Se NMR of 2f

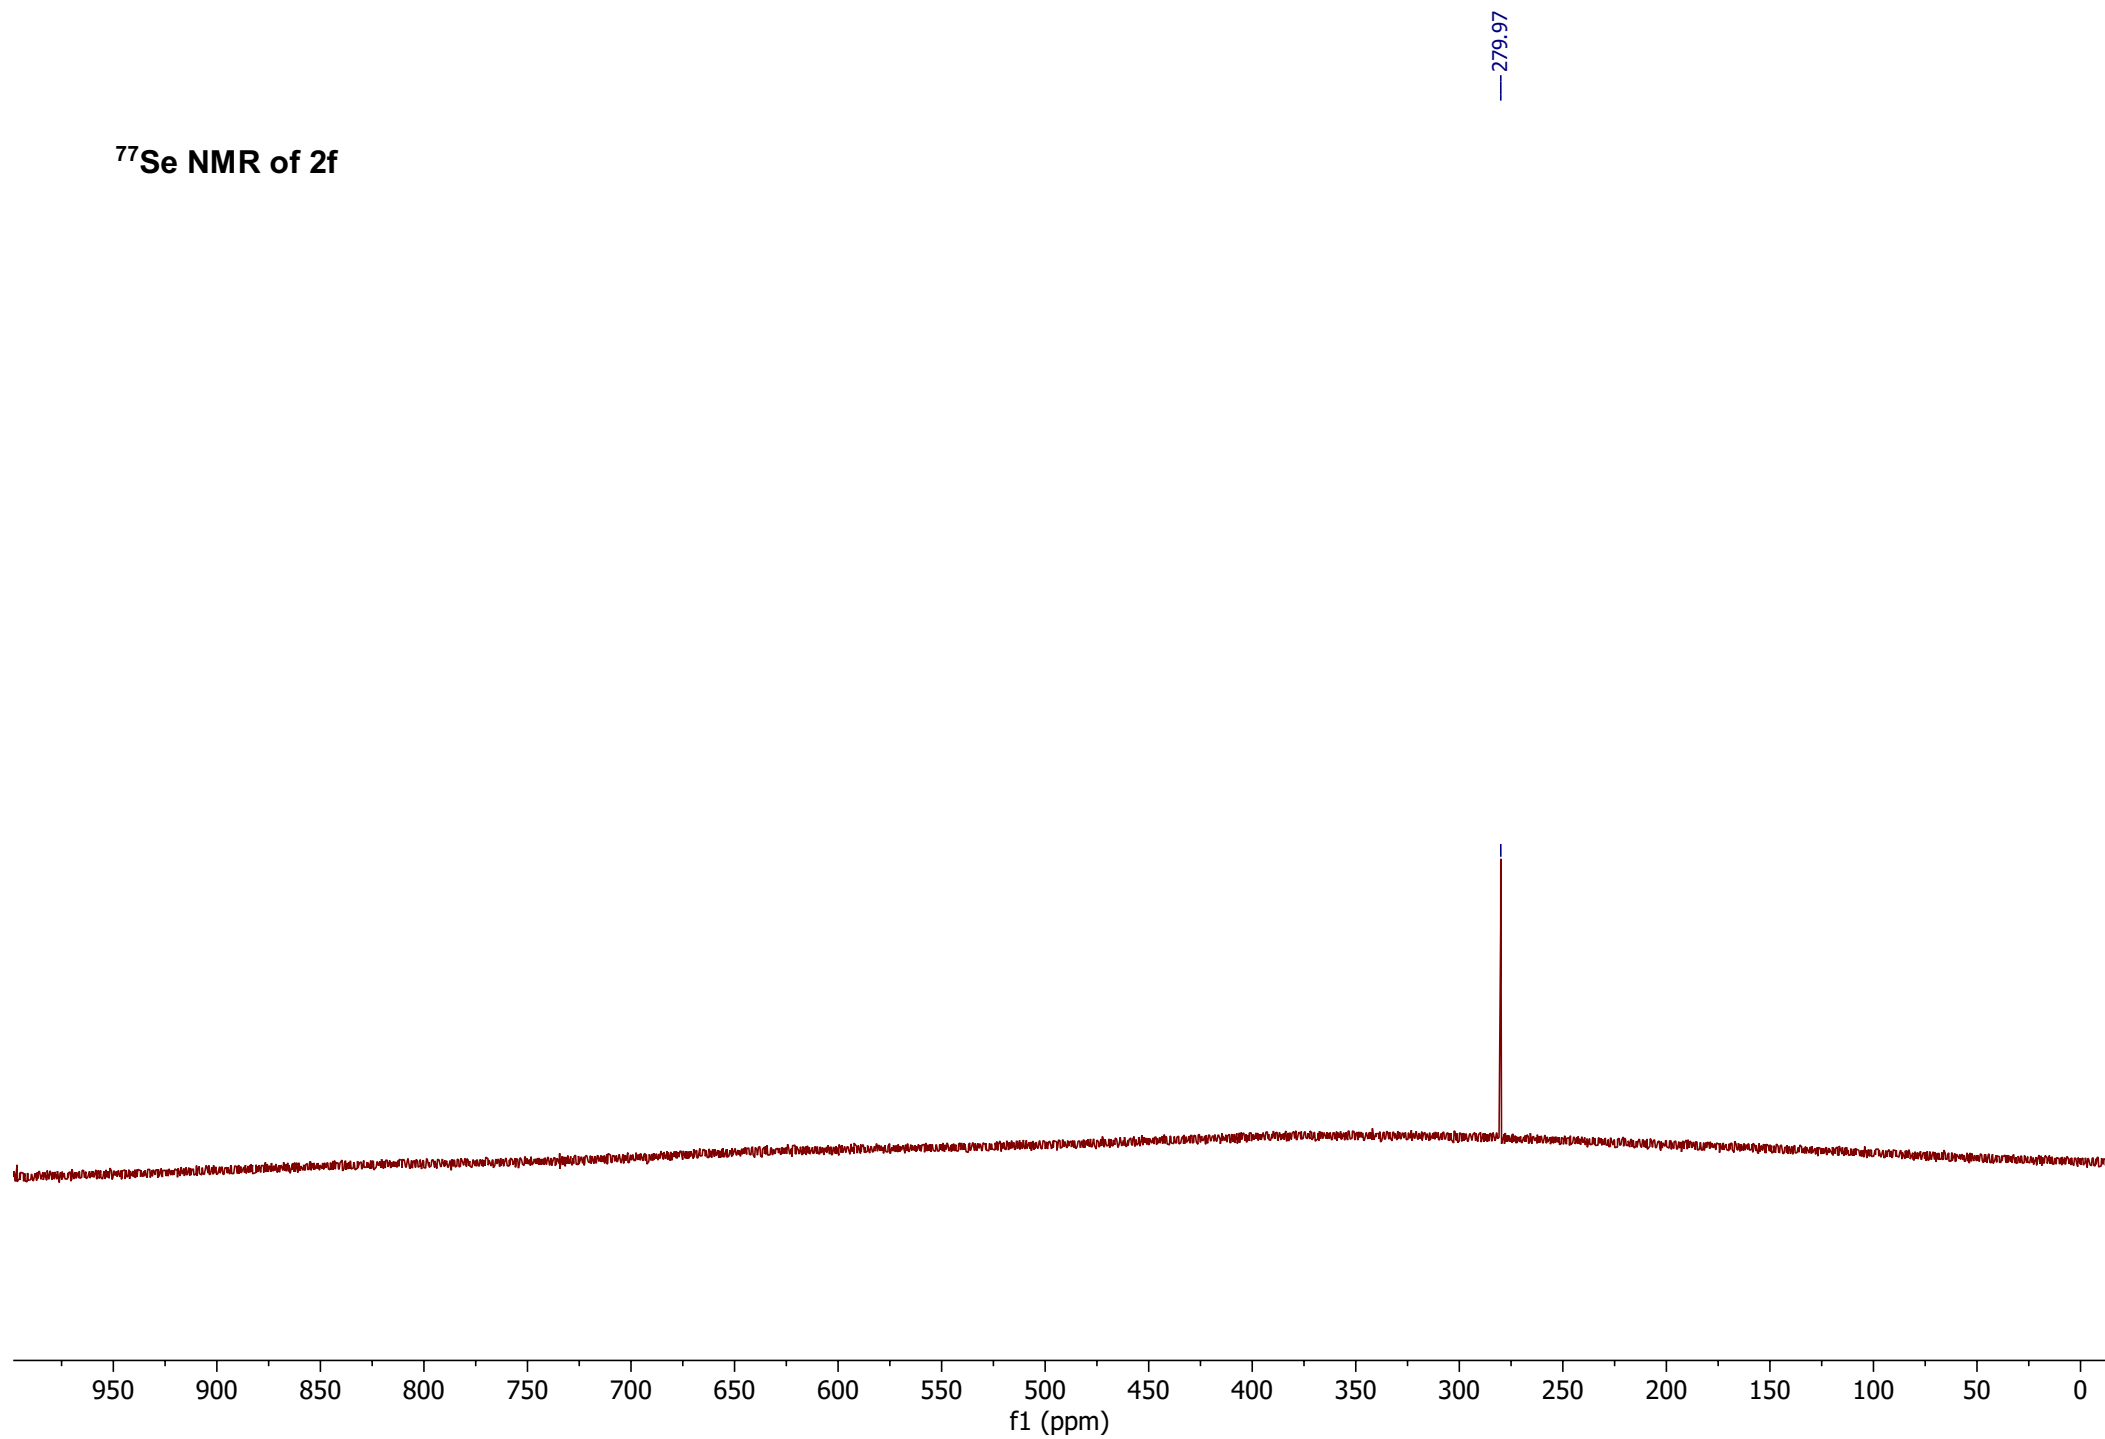



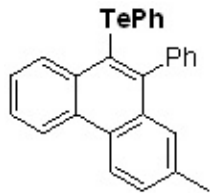

2g

149.44  
145.87  
136.75  
135.88  
135.18  
133.38  
131.97  
130.45  
130.05  
129.29  
128.95  
128.29  
127.61  
127.31  
127.12  
126.71  
122.71  
122.63  
121.73  
118.18

21.80

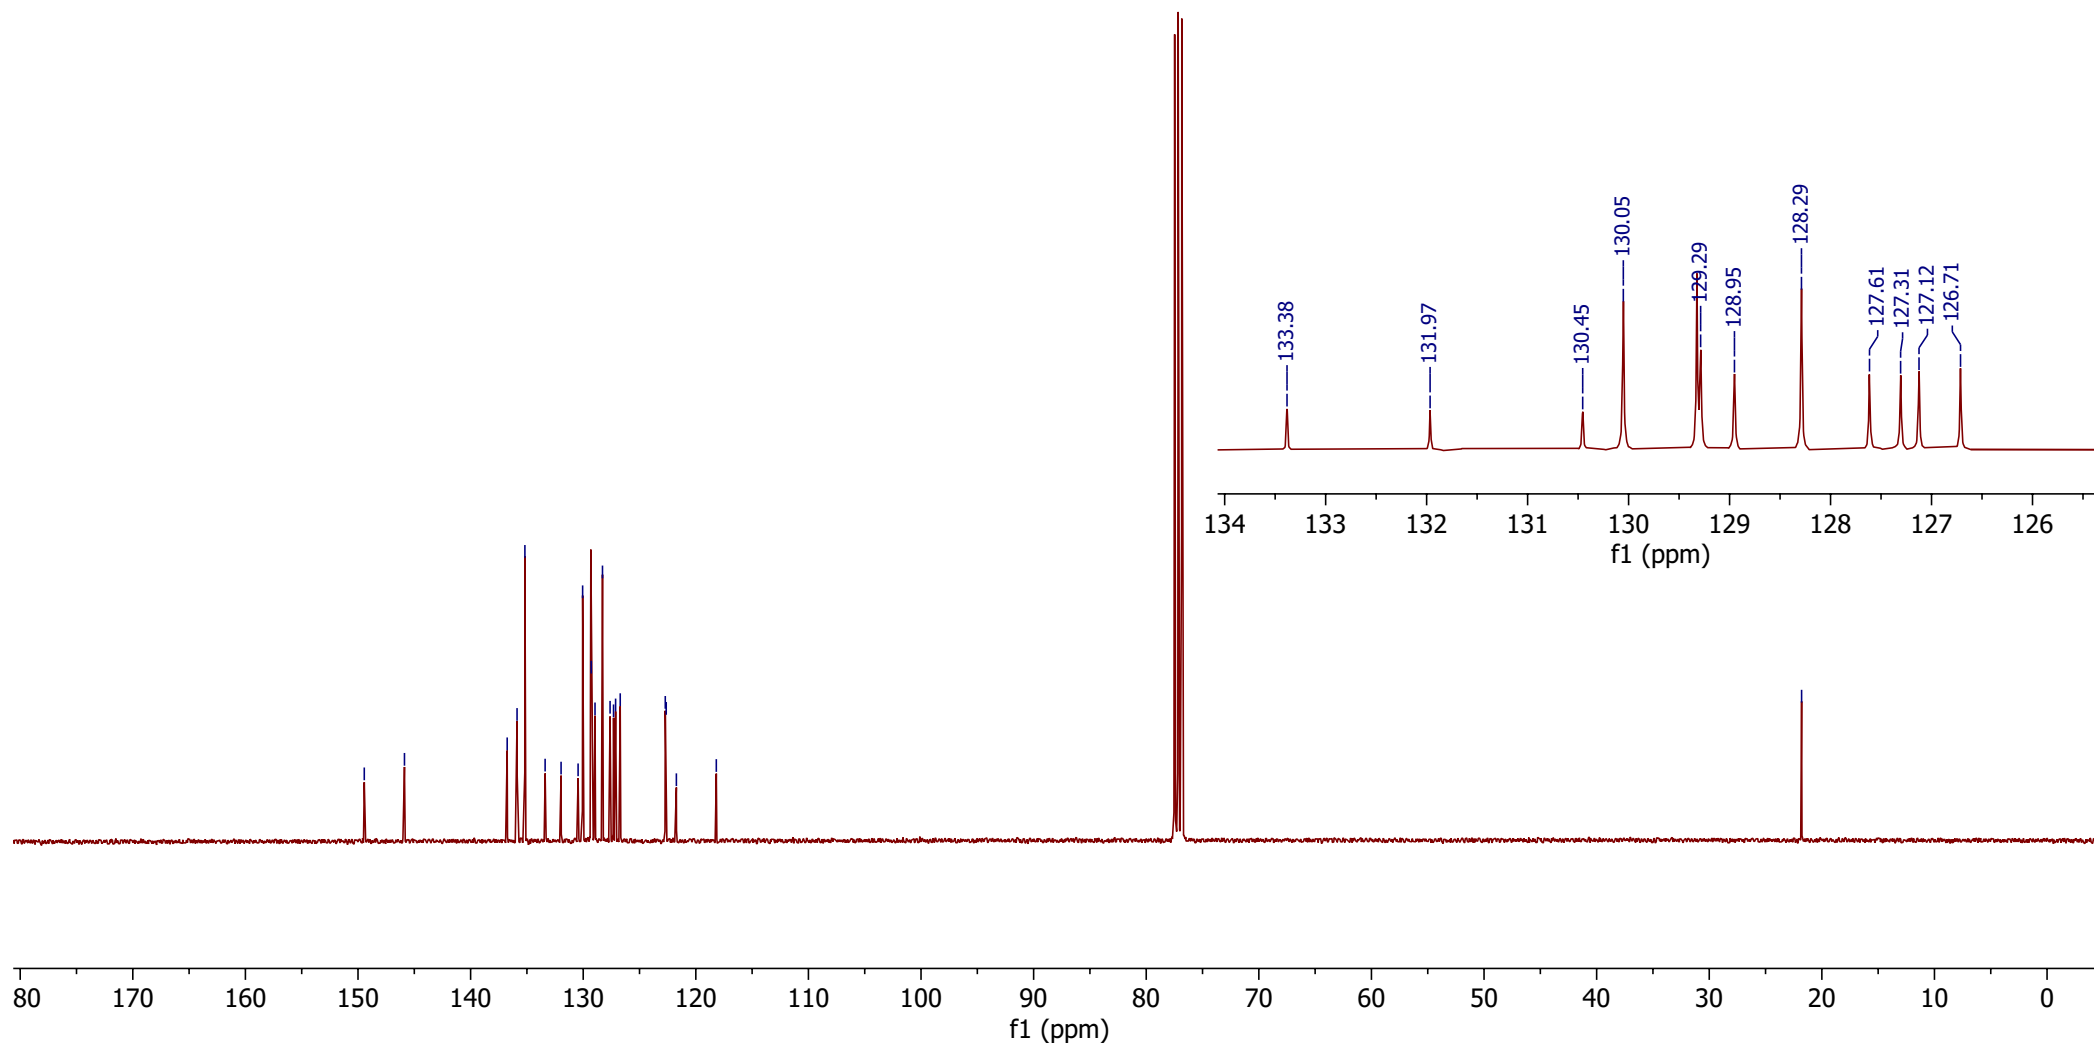

$^{125}\text{Te}$  NMR of 2g

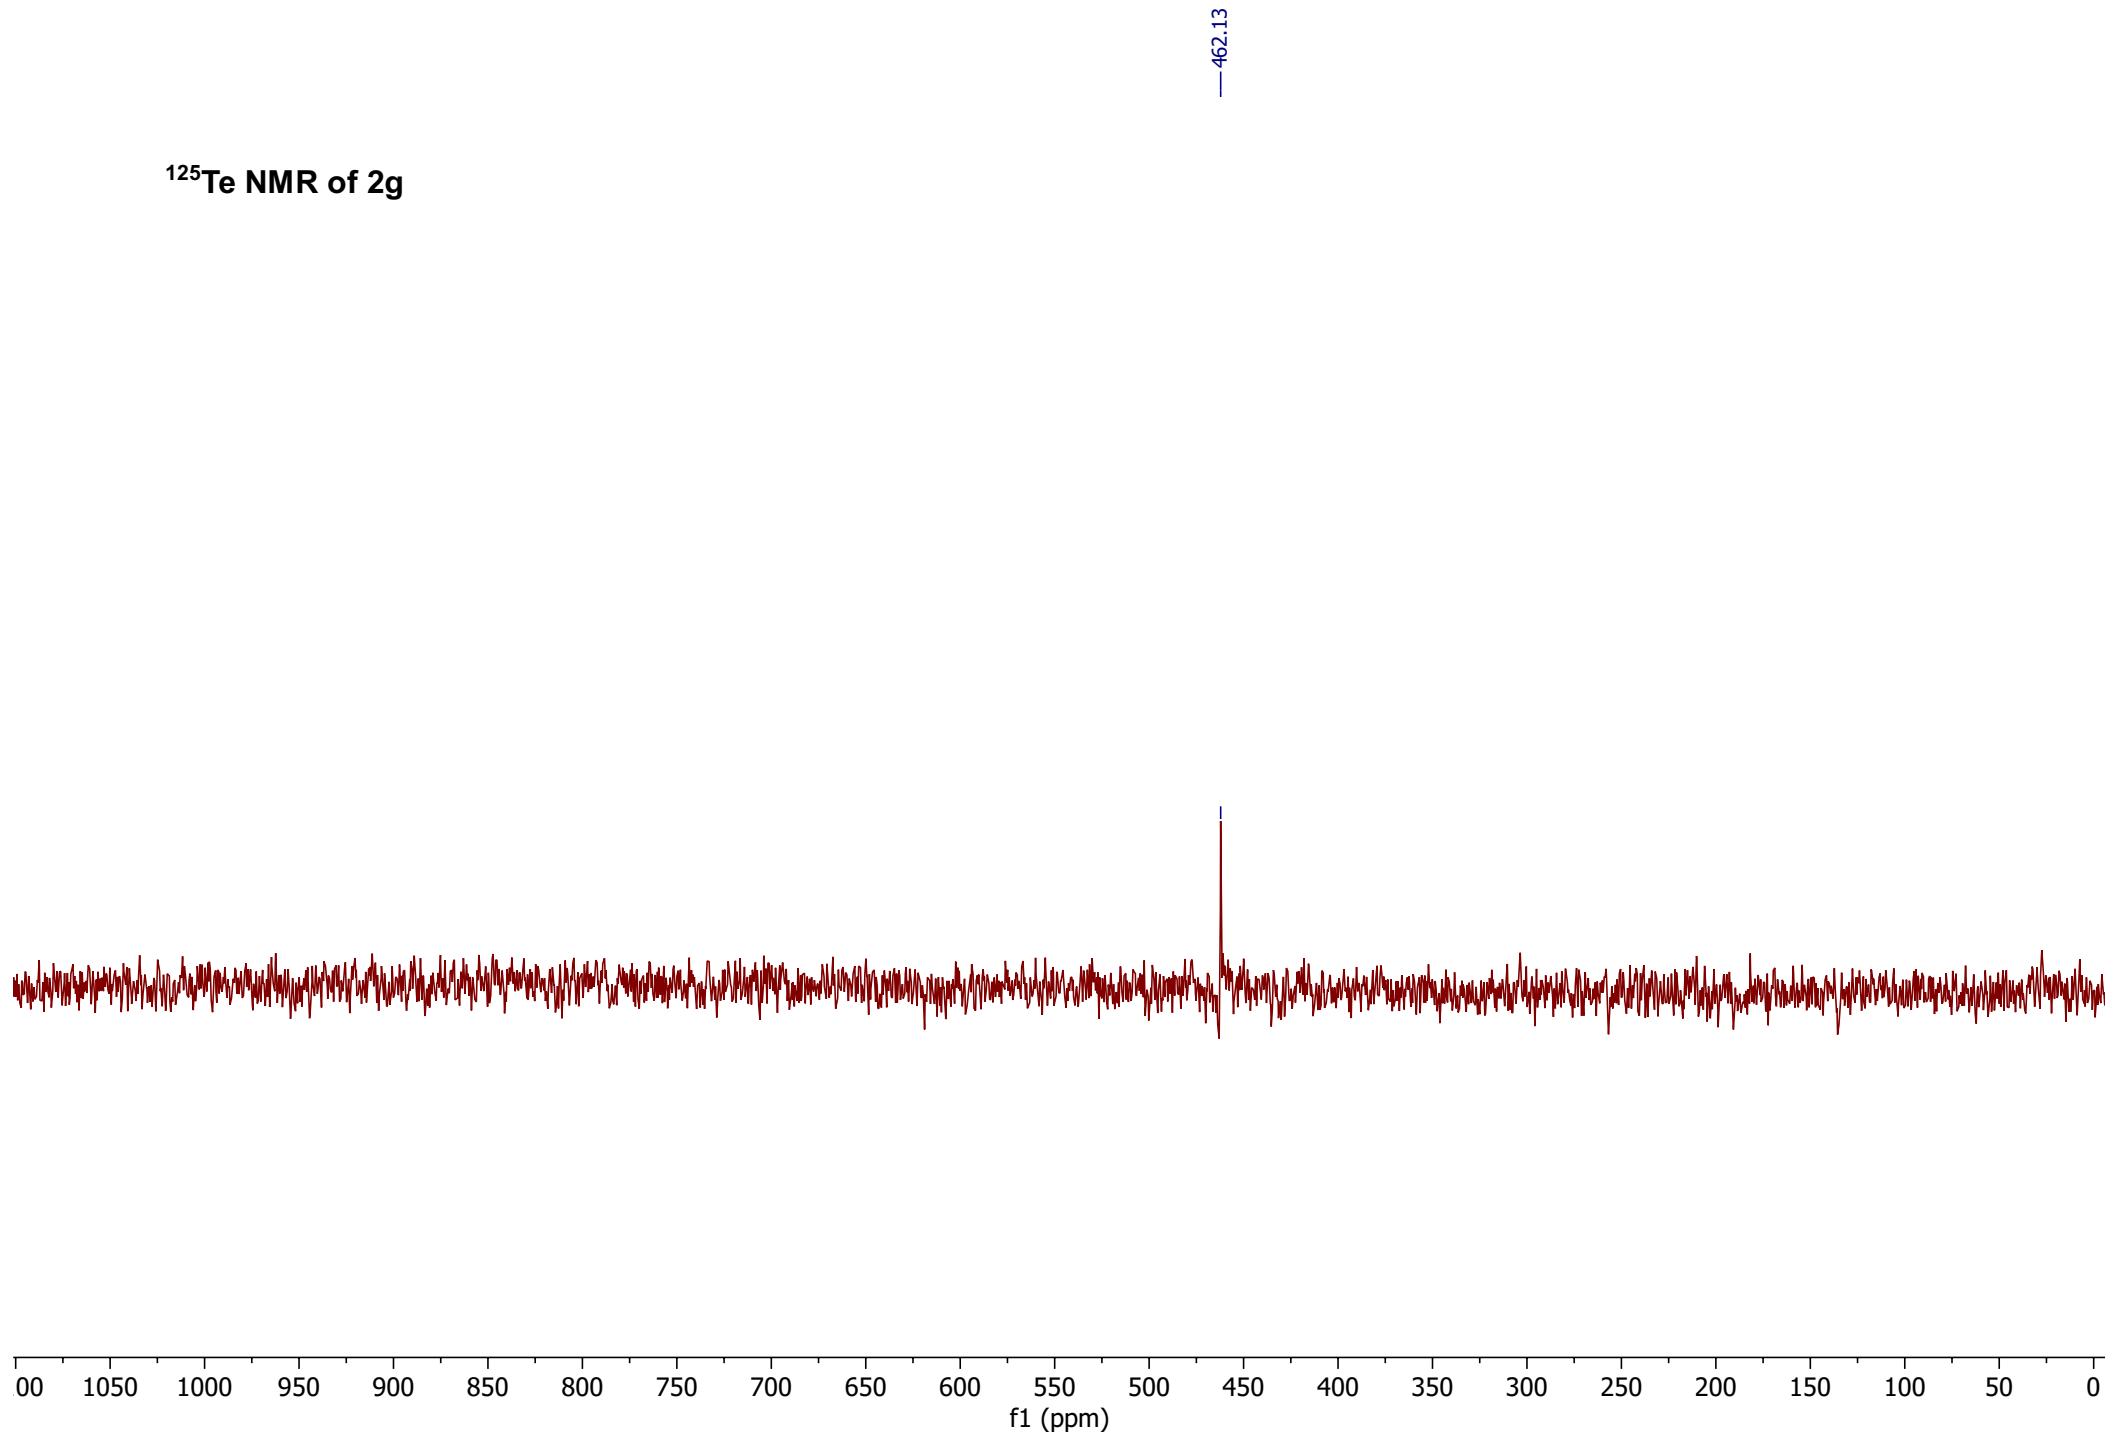

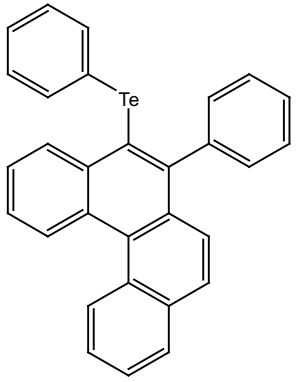

2h

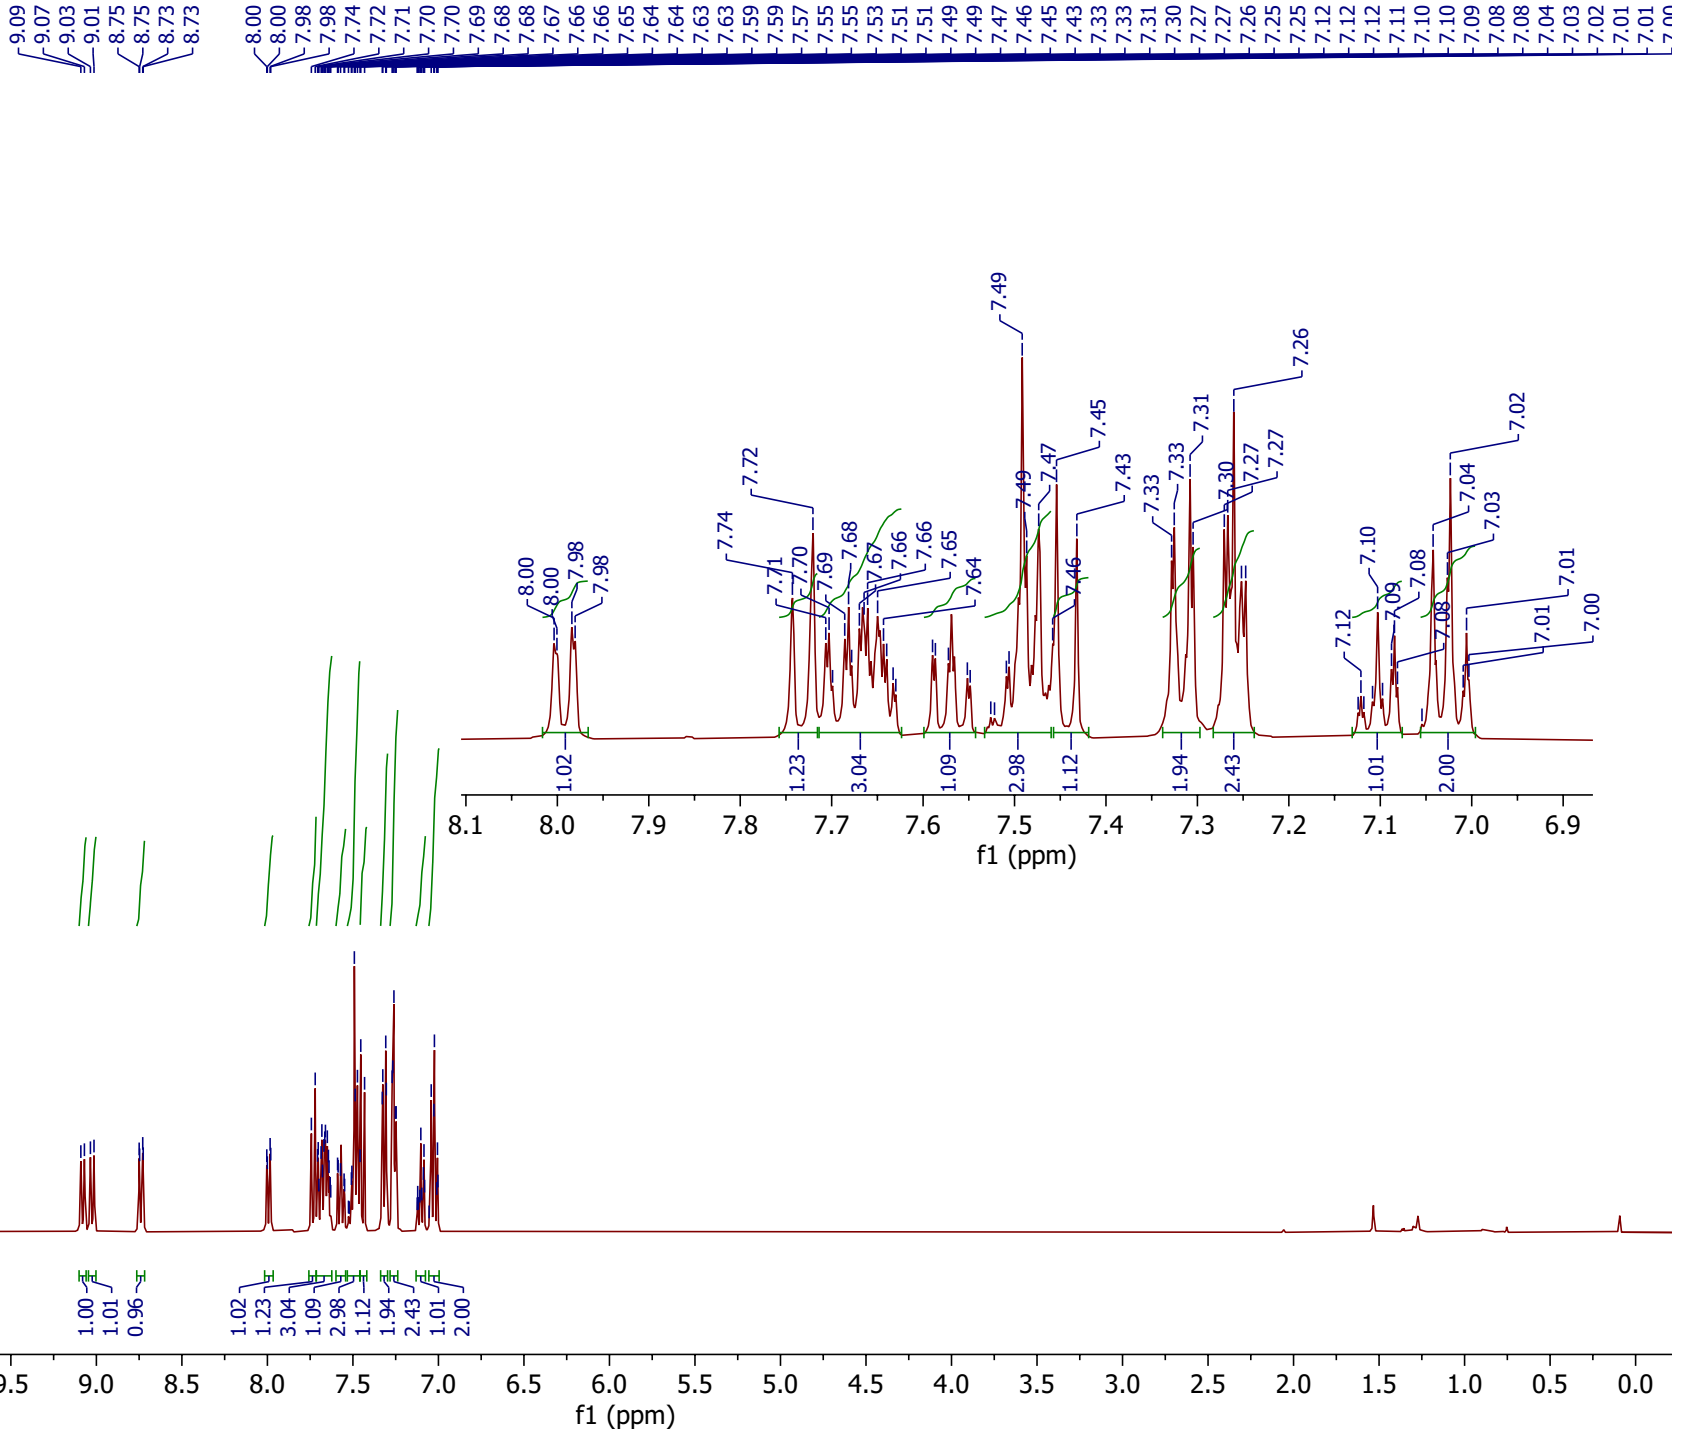

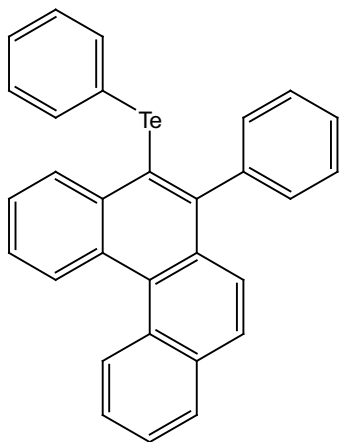

2h

148.65  
145.44  
135.56  
135.09  
135.05  
133.58  
130.39  
130.29  
129.87  
129.65  
129.37  
129.05  
128.86  
128.37  
128.31  
127.84  
127.27  
127.20  
126.89  
126.66  
126.33  
126.25  
121.69  
118.15

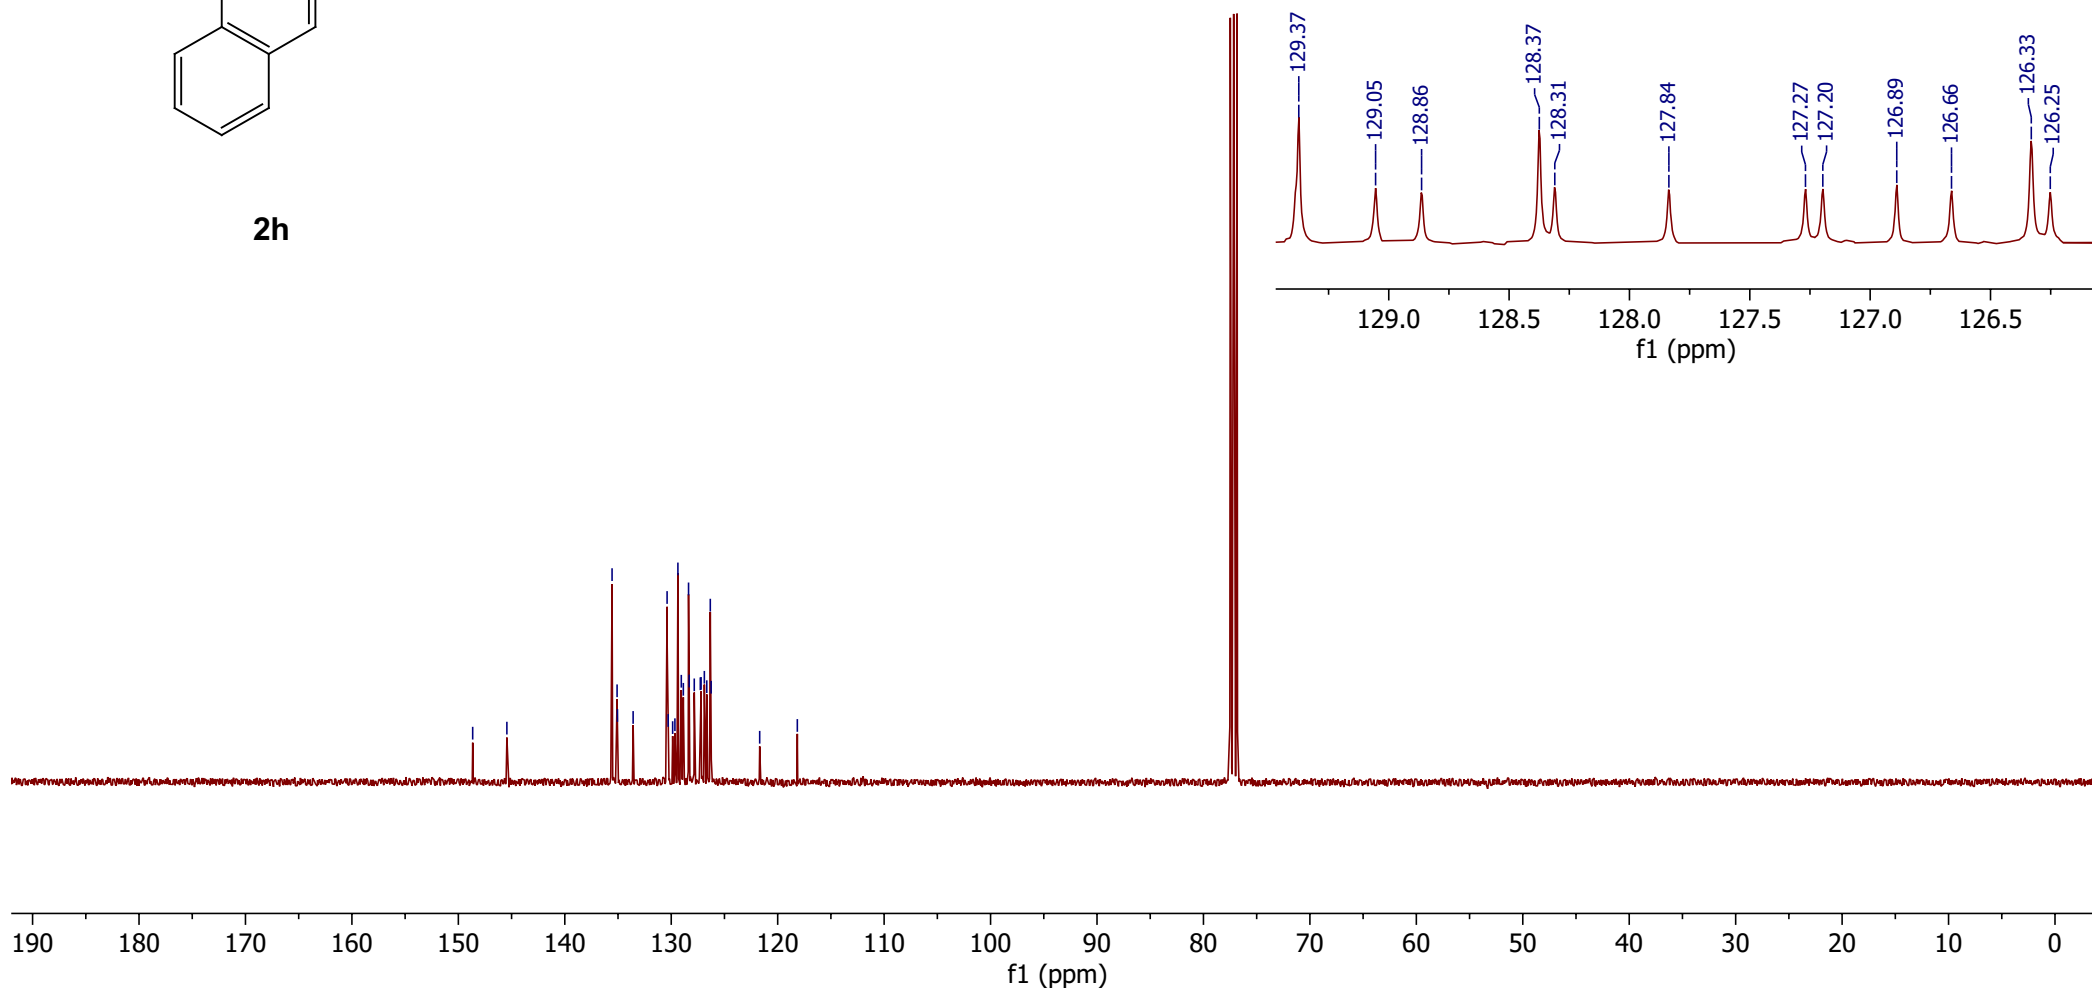



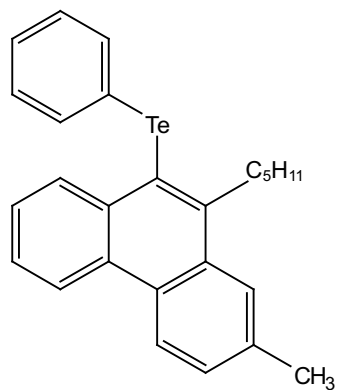

**2i**

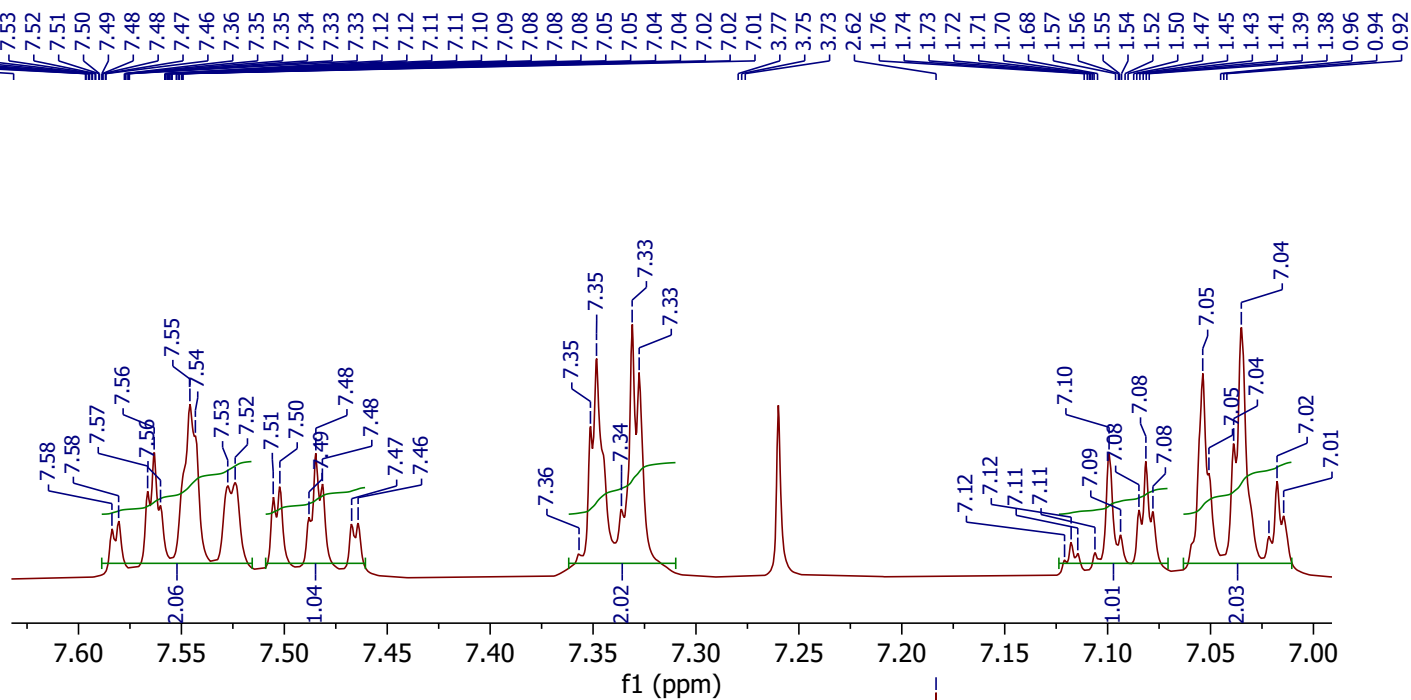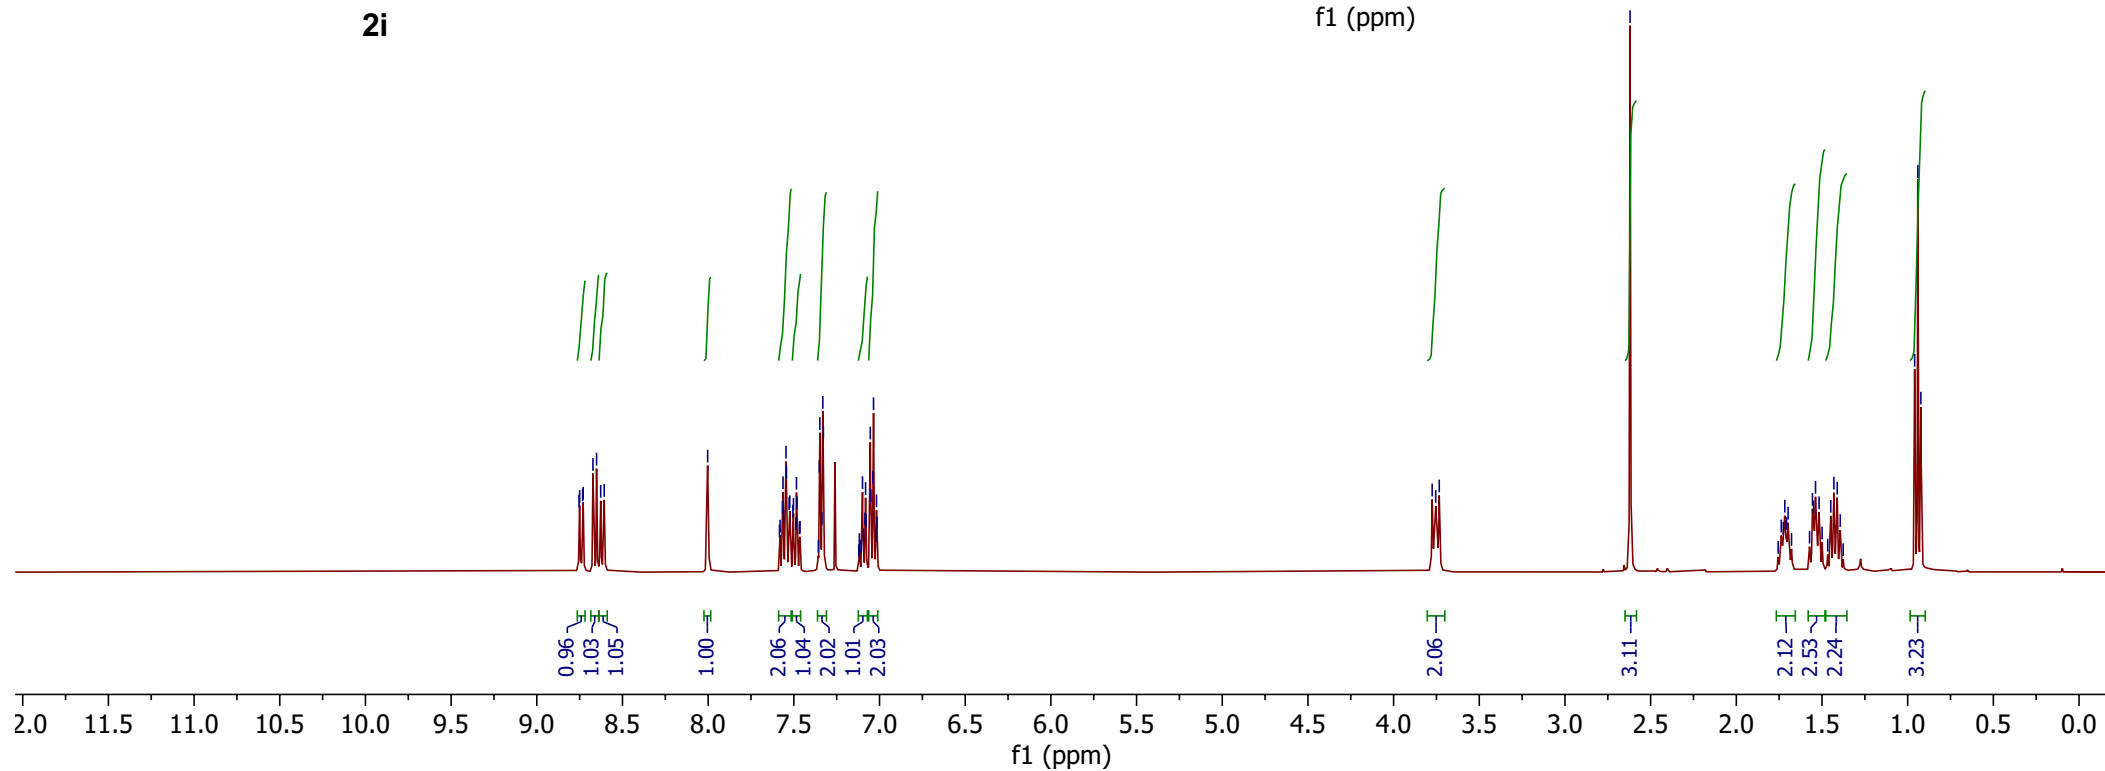

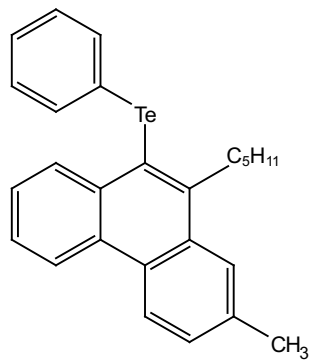

2i

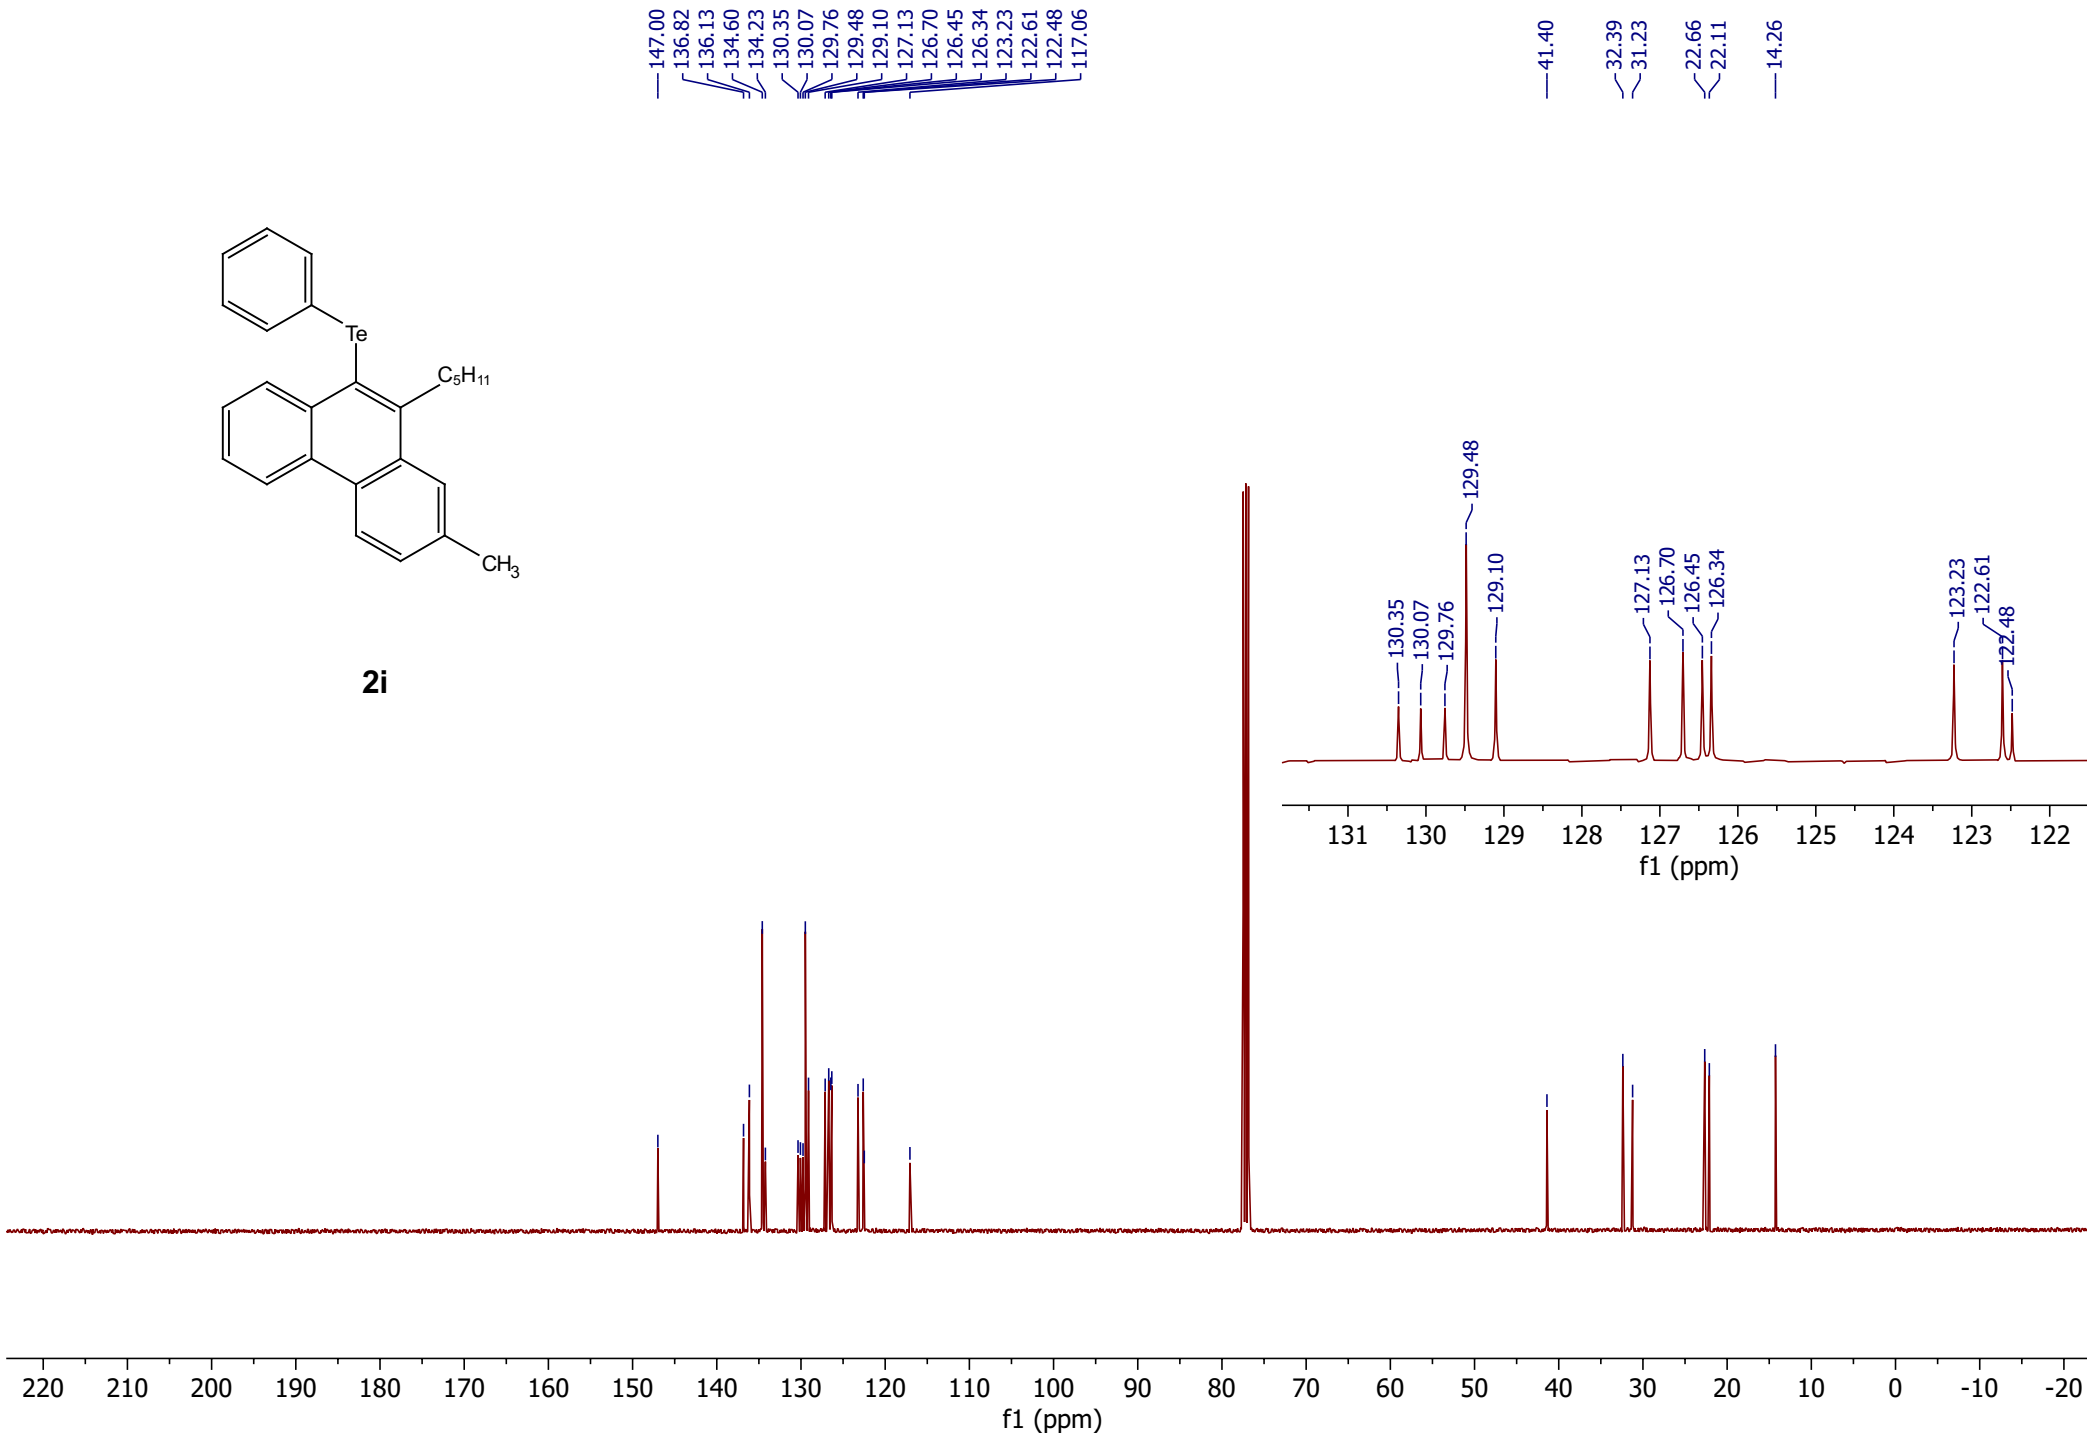

$^{125}\text{Te}$  NMR of 2i

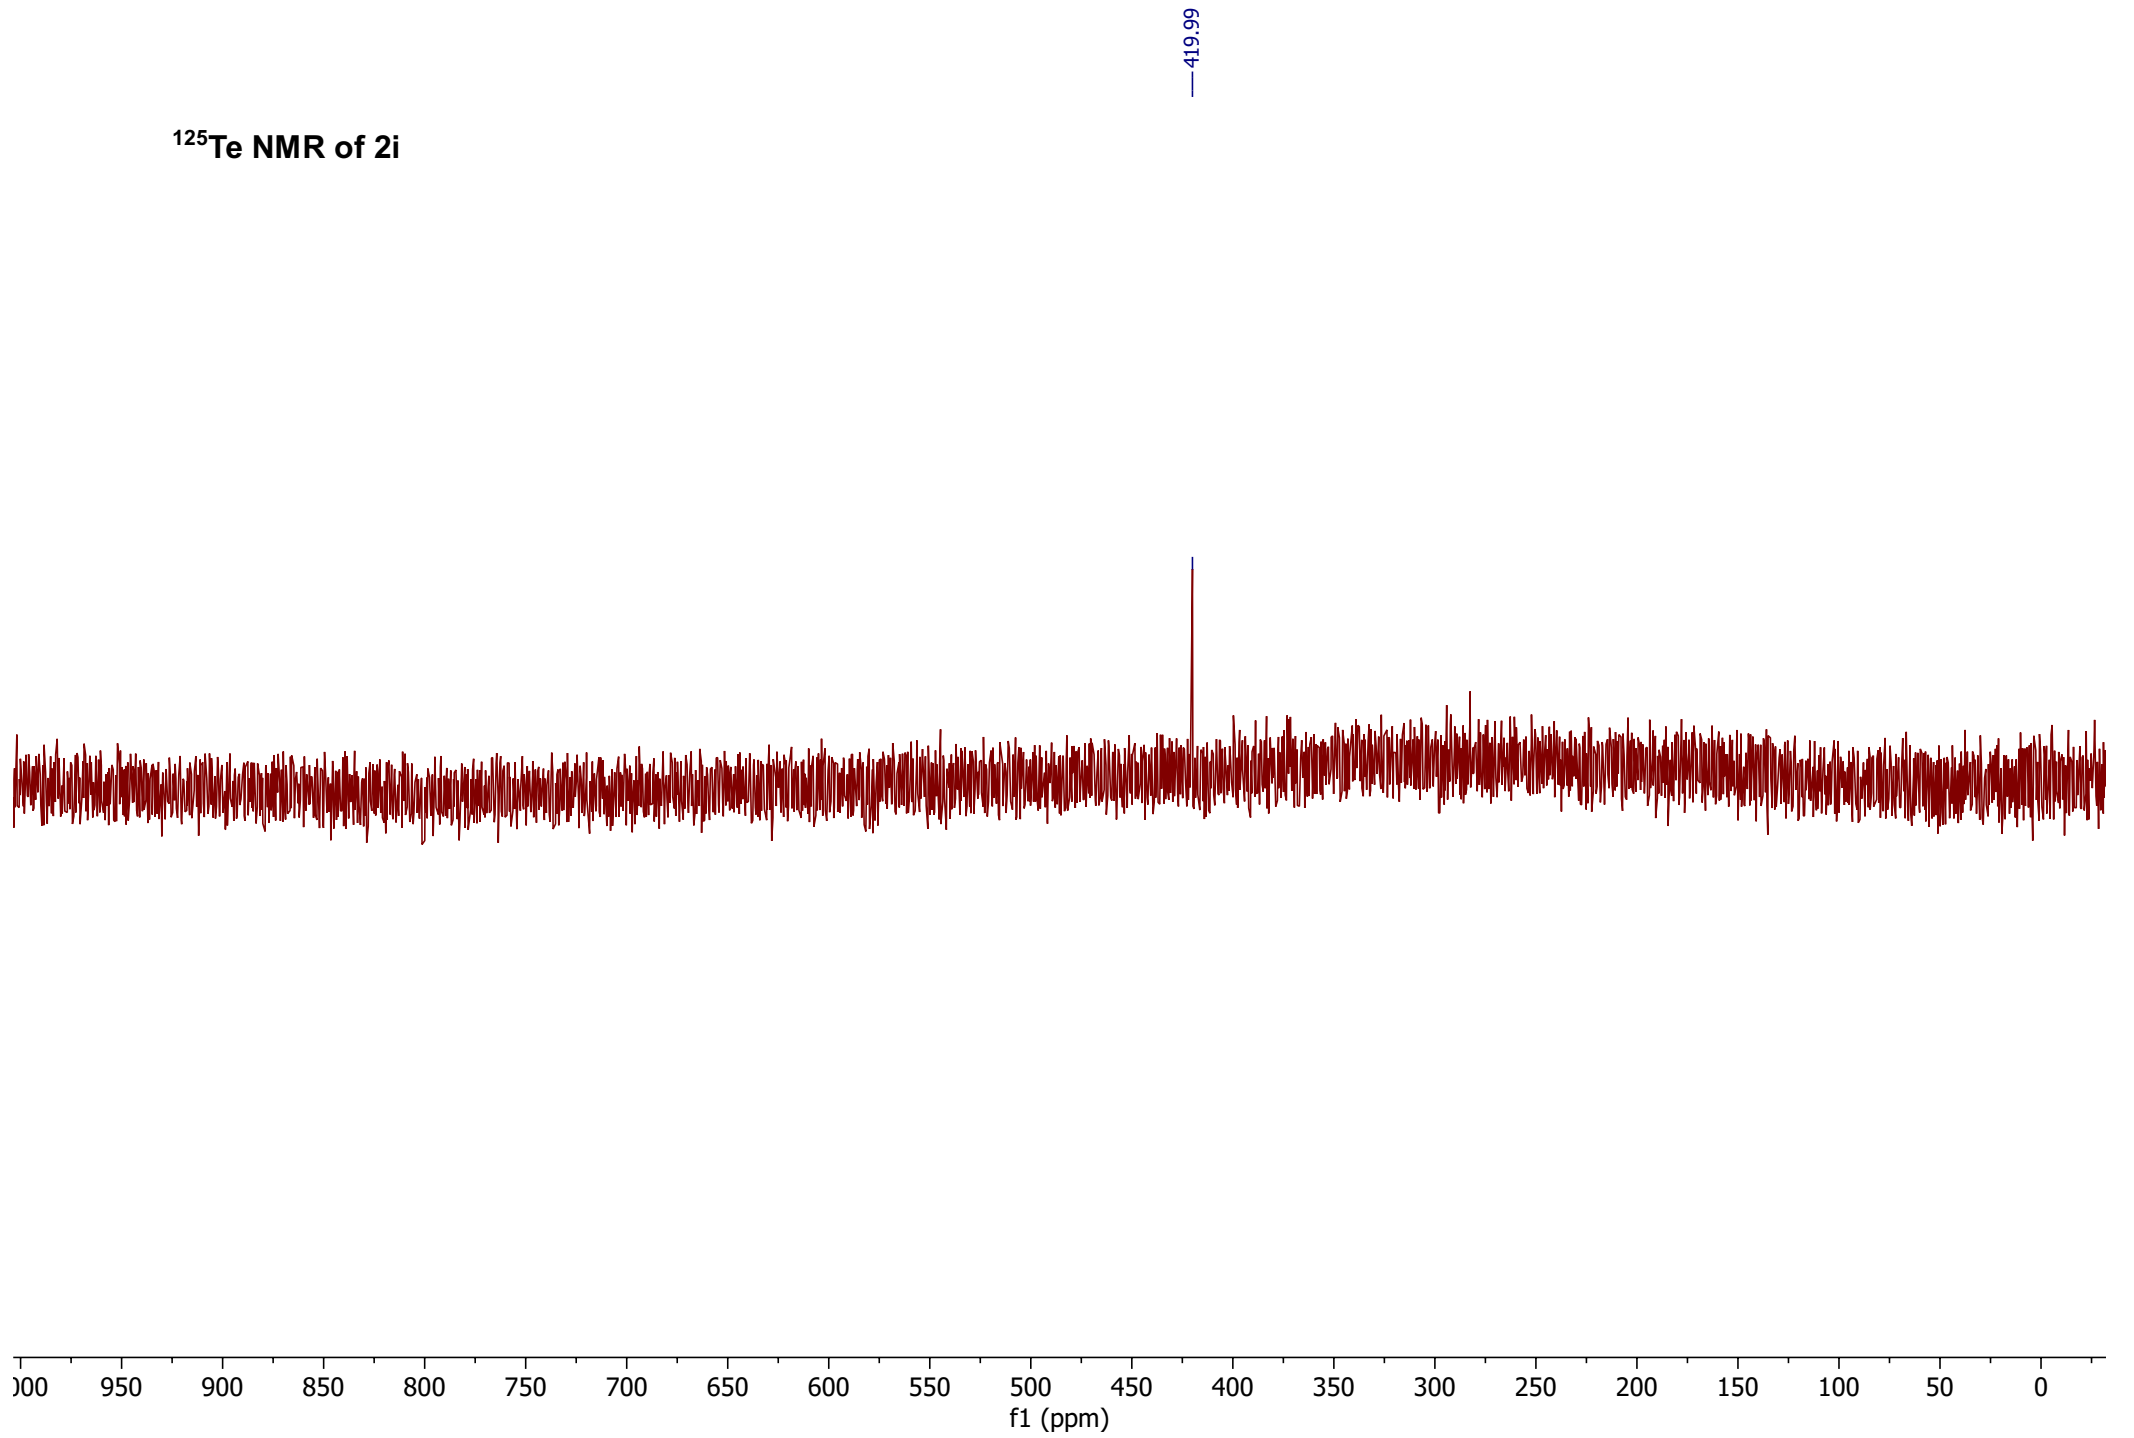

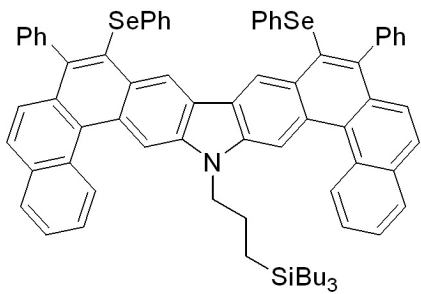

7a

9.65  
9.31  
9.28  
8.99

7.78  
7.76  
7.74  
7.72  
7.70  
7.68  
7.66  
7.49  
7.49  
7.48  
7.47  
7.46  
7.46  
7.33  
7.32  
7.31  
7.31  
7.30  
7.23  
7.23  
7.21  
7.20  
7.20  
7.05  
7.04  
7.02  
7.01  
7.00  
7.00  
6.99  
4.52  
4.50  
4.49

2.22  
2.20  
2.18  
2.16  
2.14  
2.14  
1.24  
1.22  
1.21  
1.20  
1.18  
1.18  
0.91  
0.89  
0.88  
0.87  
0.86  
0.75  
0.73  
0.71  
0.57  
0.56  
0.55  
0.53

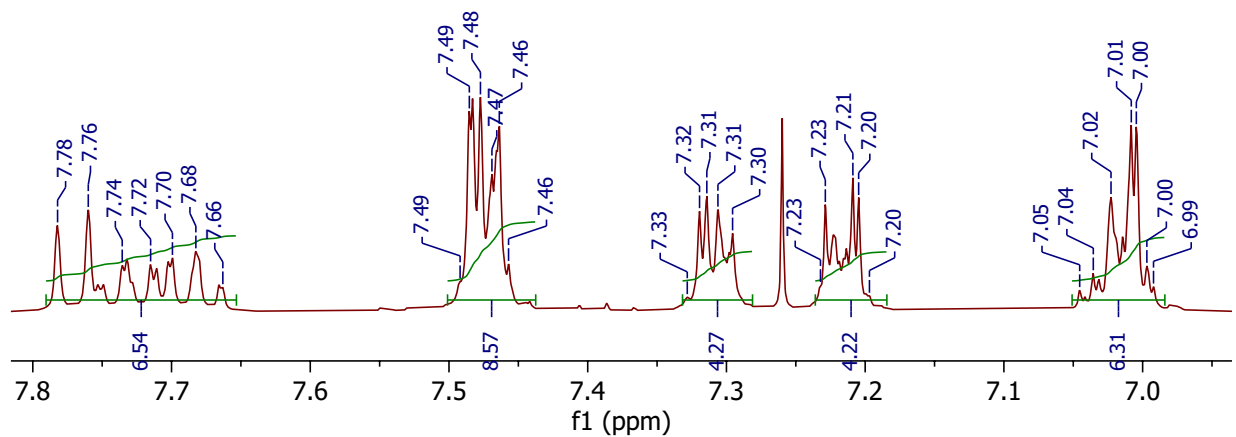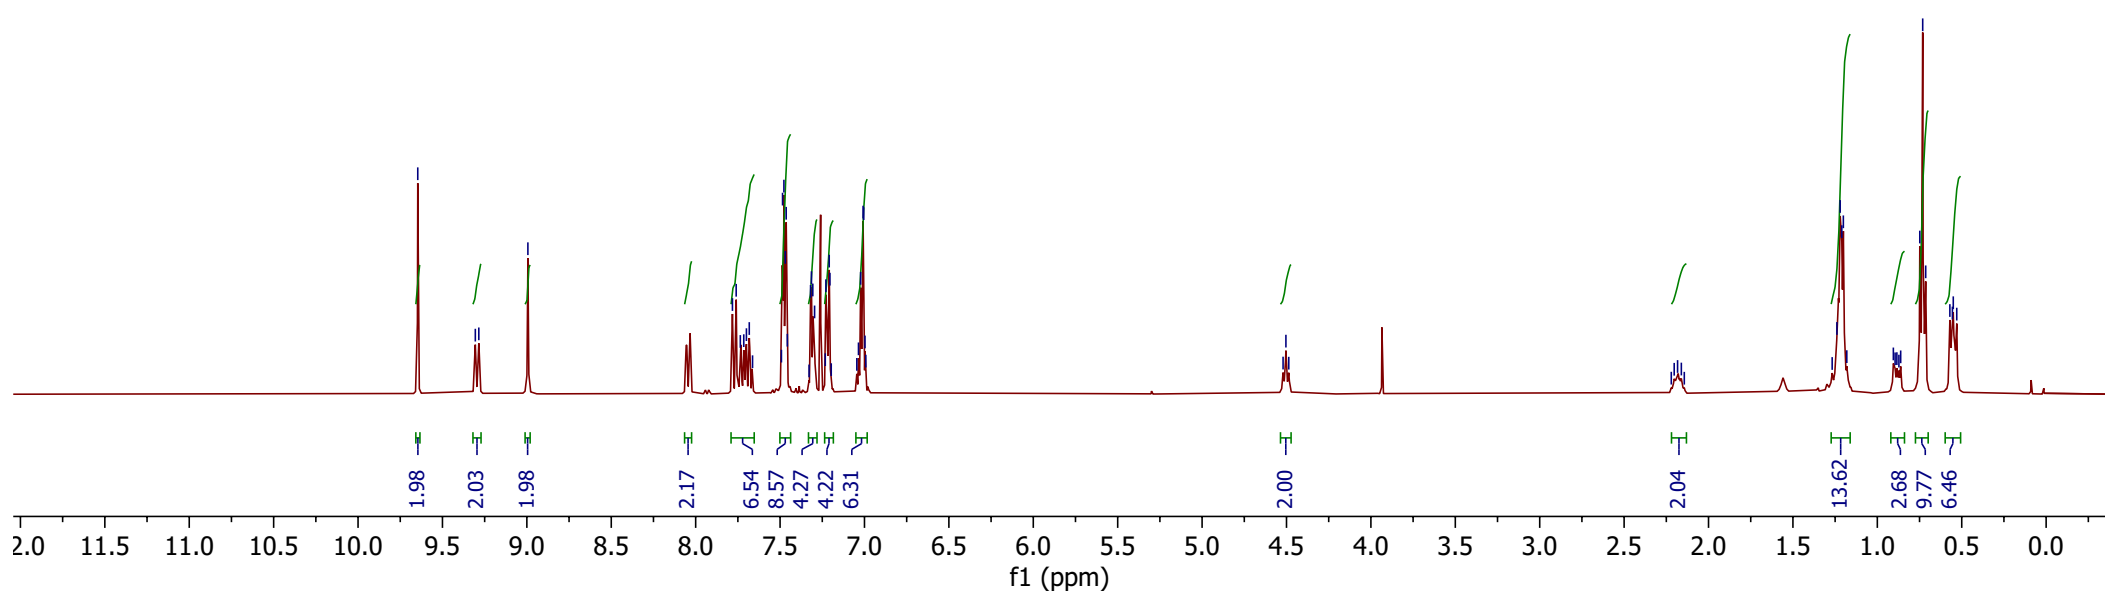

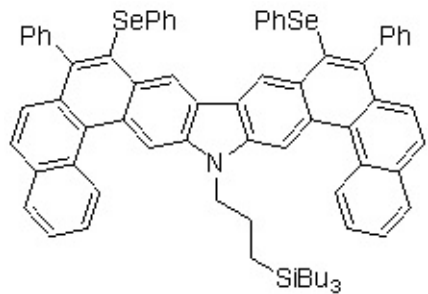

**7a**

- 134.45
- 133.39
- 130.43
- 130.38
- 130.29
- 130.25
- 130.11
- 129.69
- 129.35
- 129.03
- 128.67
- 128.44
- 128.22
- 127.98
- 127.93
- 127.29
- 126.86
- 126.17
- 126.01
- 125.89
- 124.59
- 122.55
- 105.90

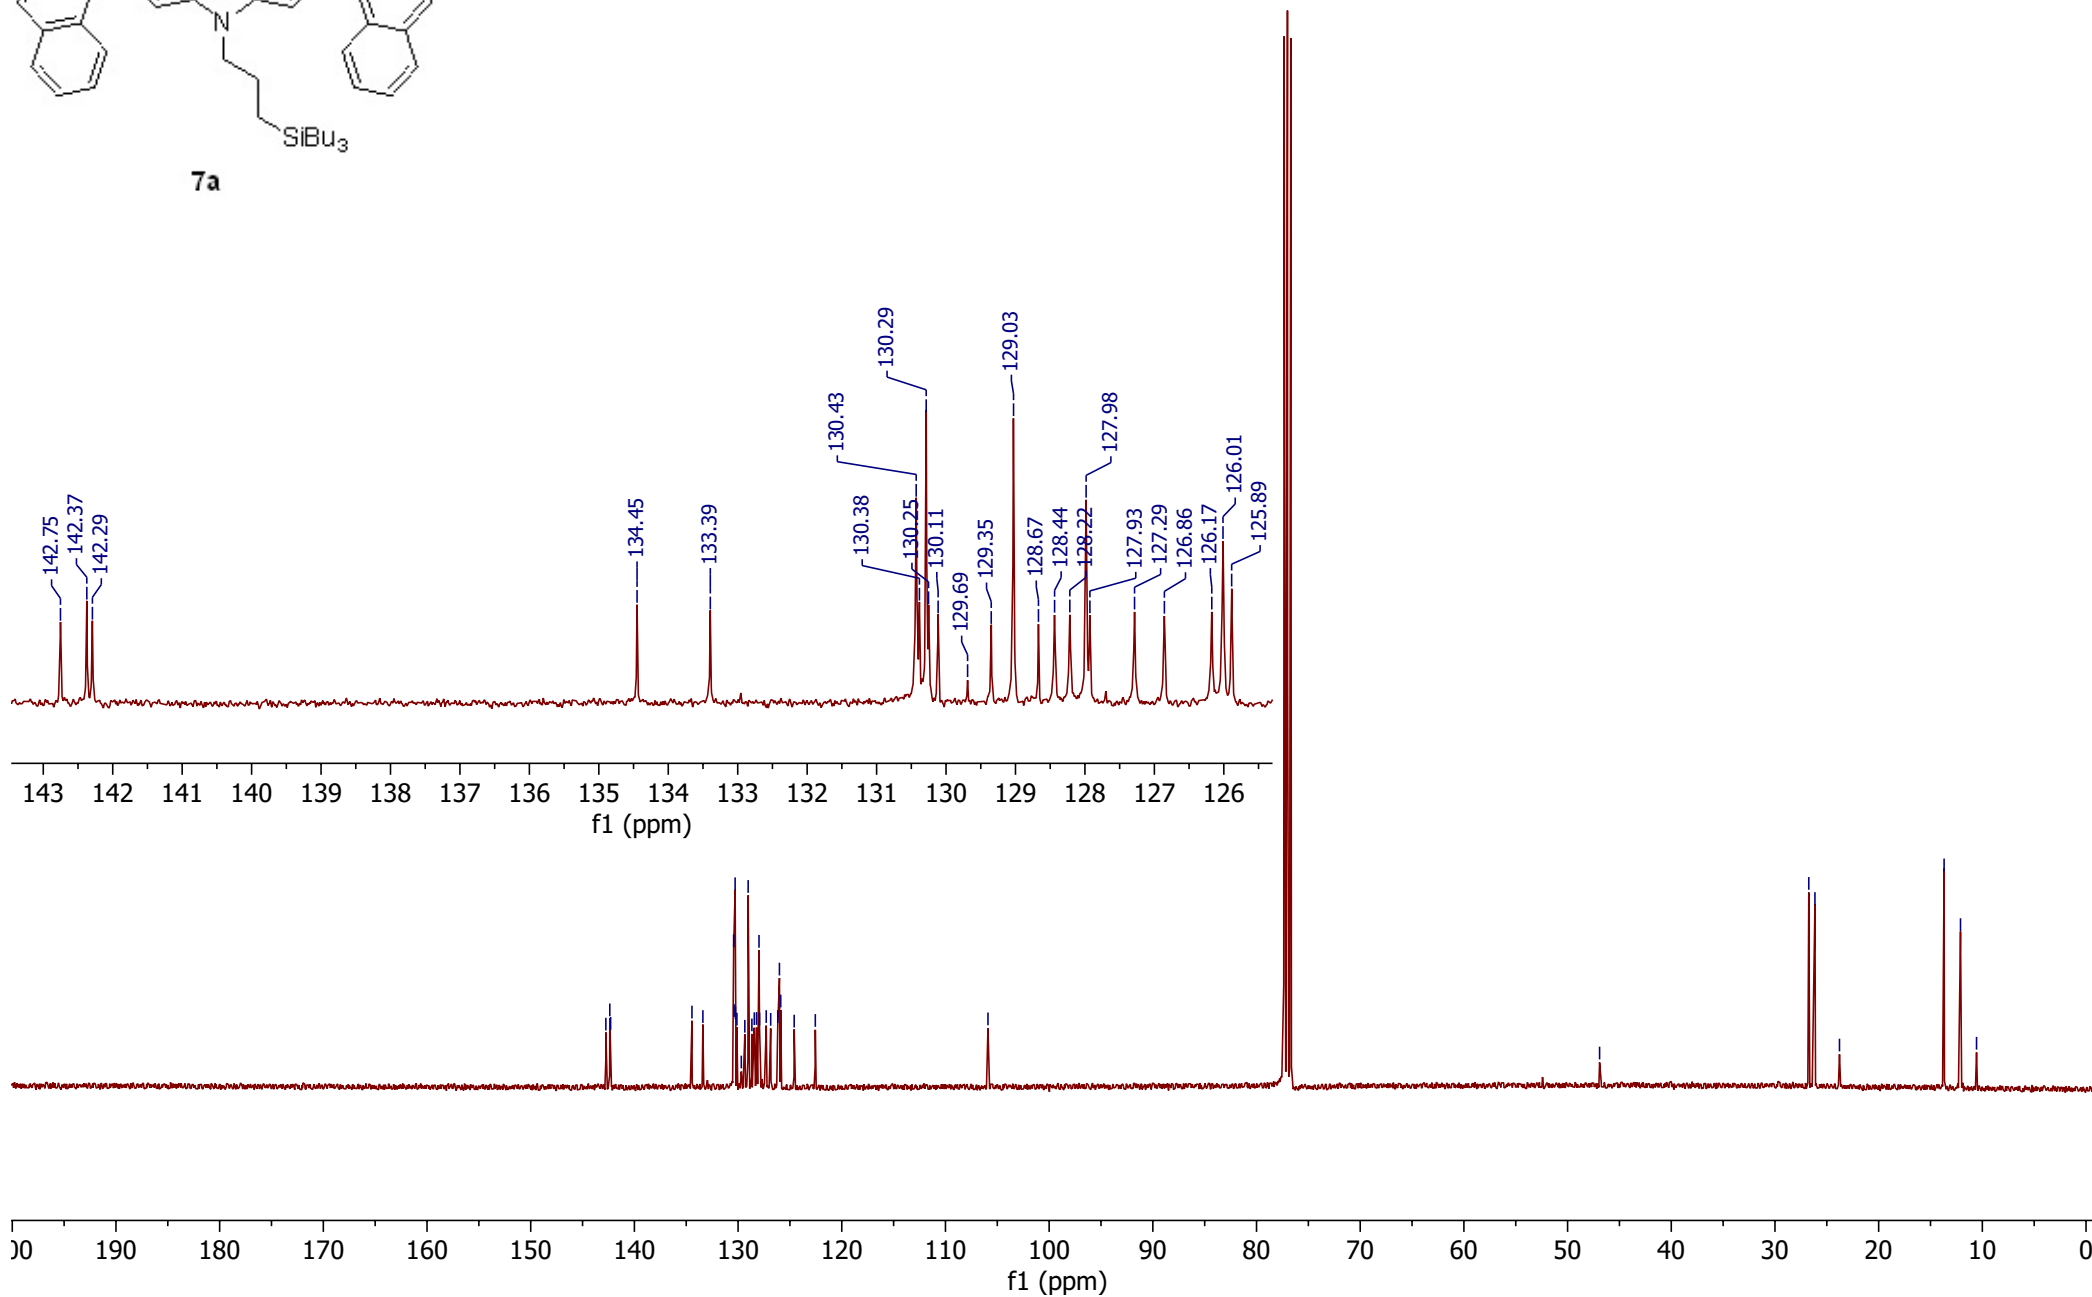

<sup>77</sup>Se NMR of 7a

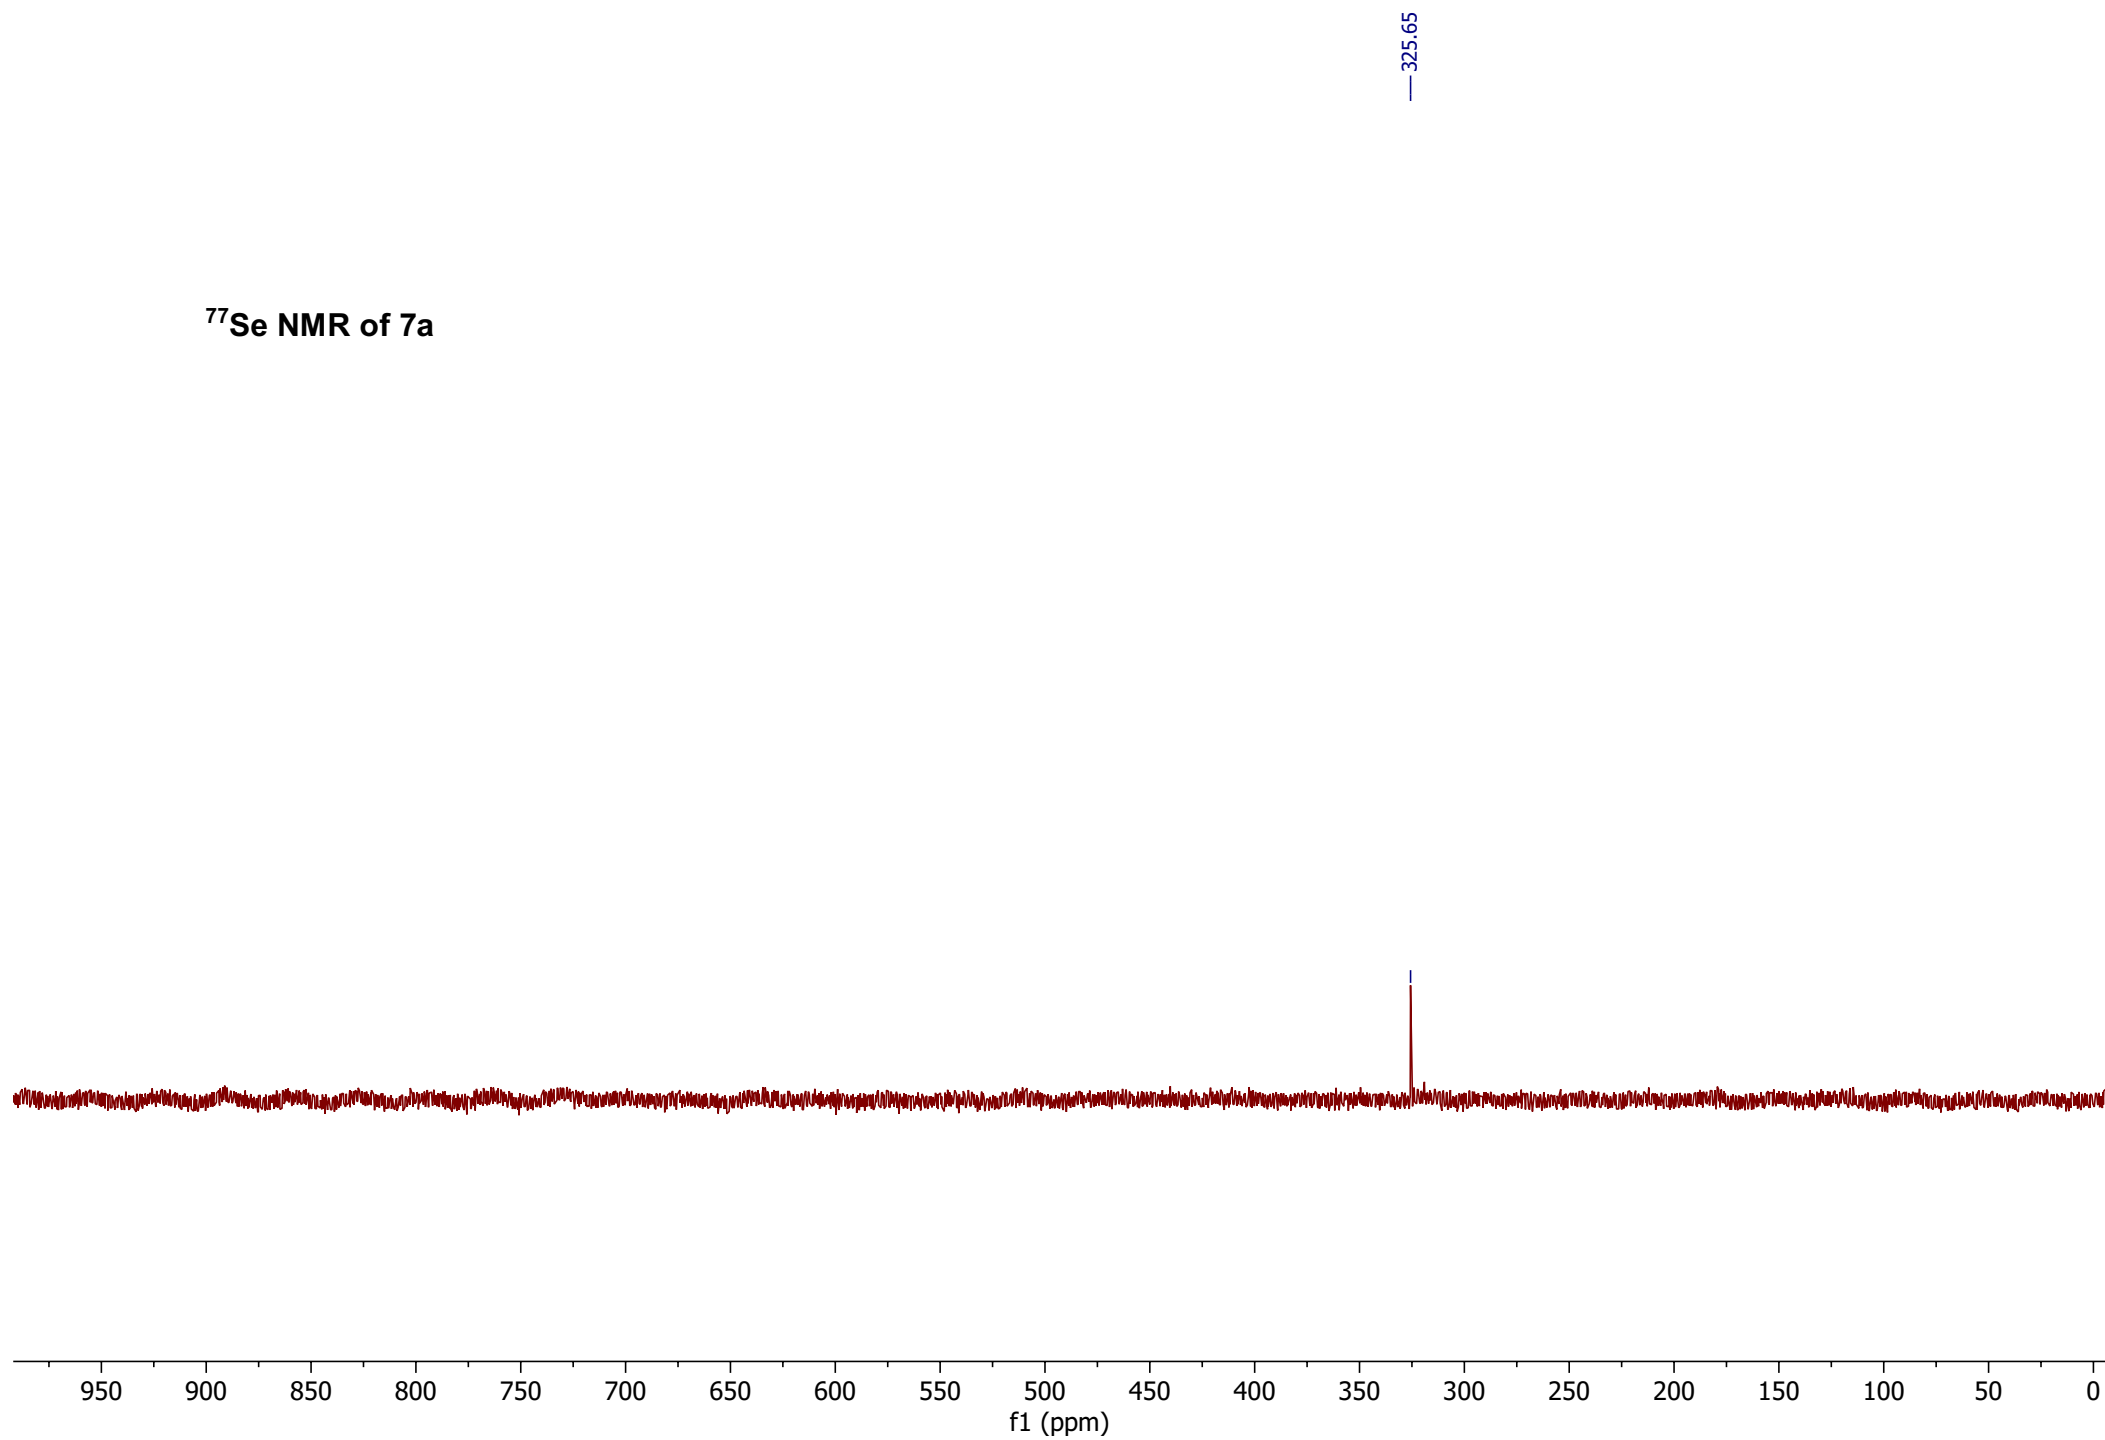

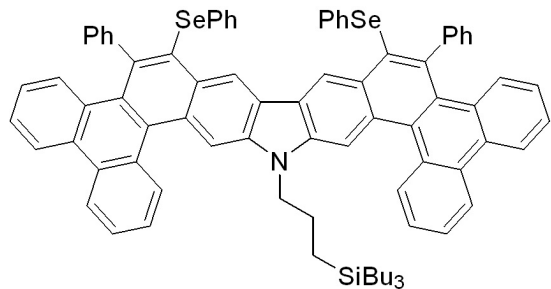

7b

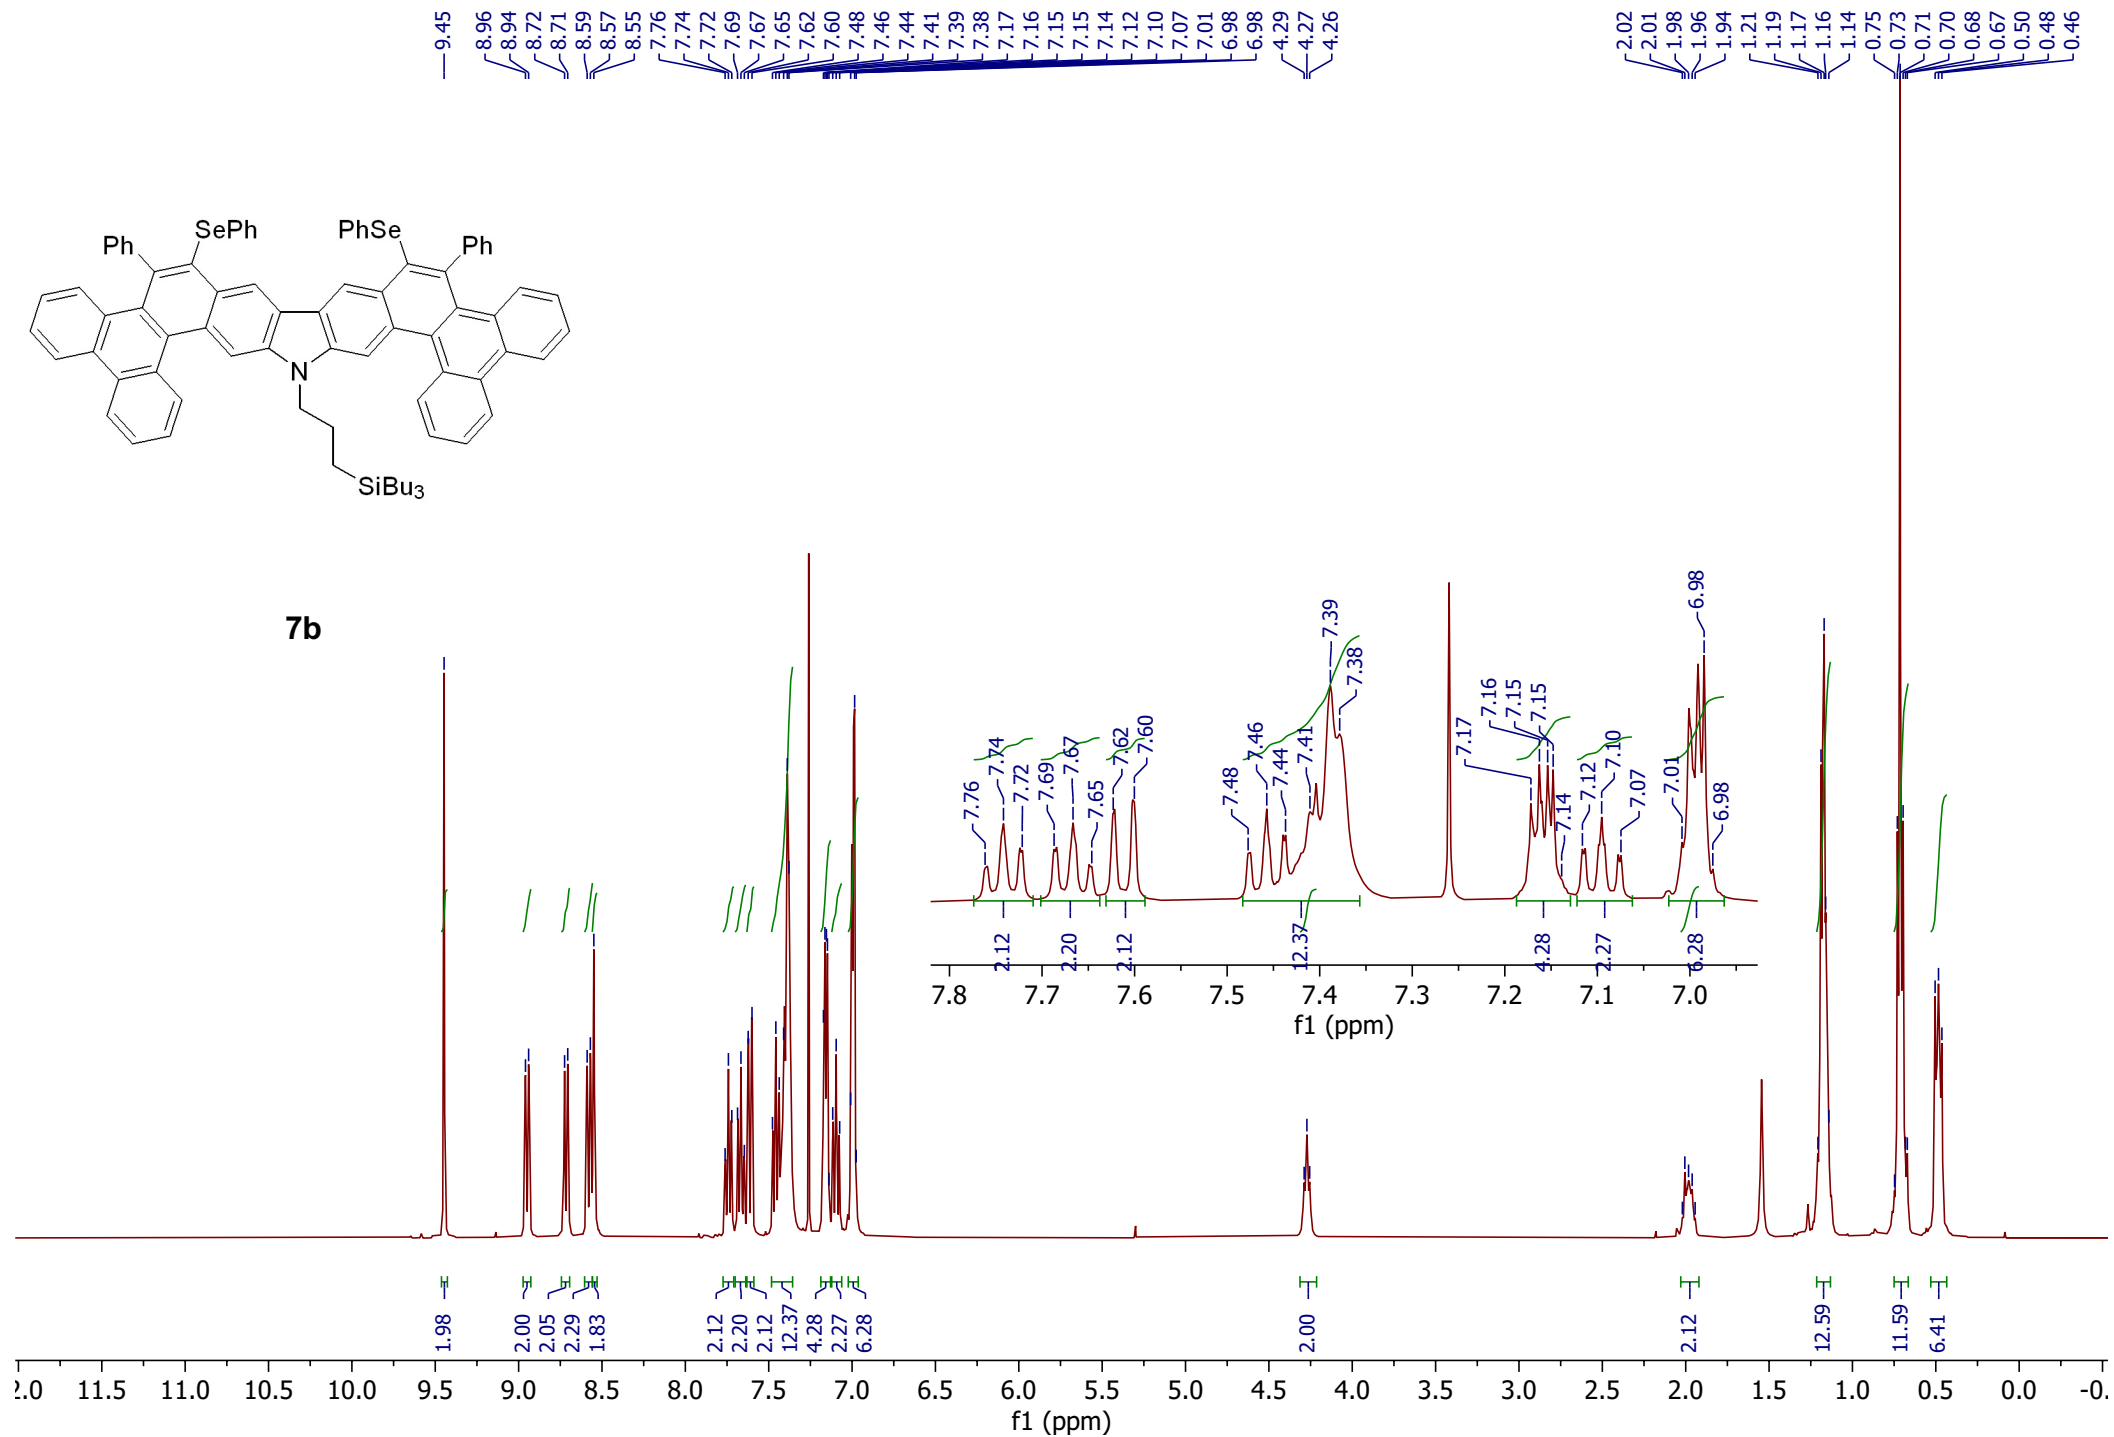

# <sup>13</sup>C NMR of 7b

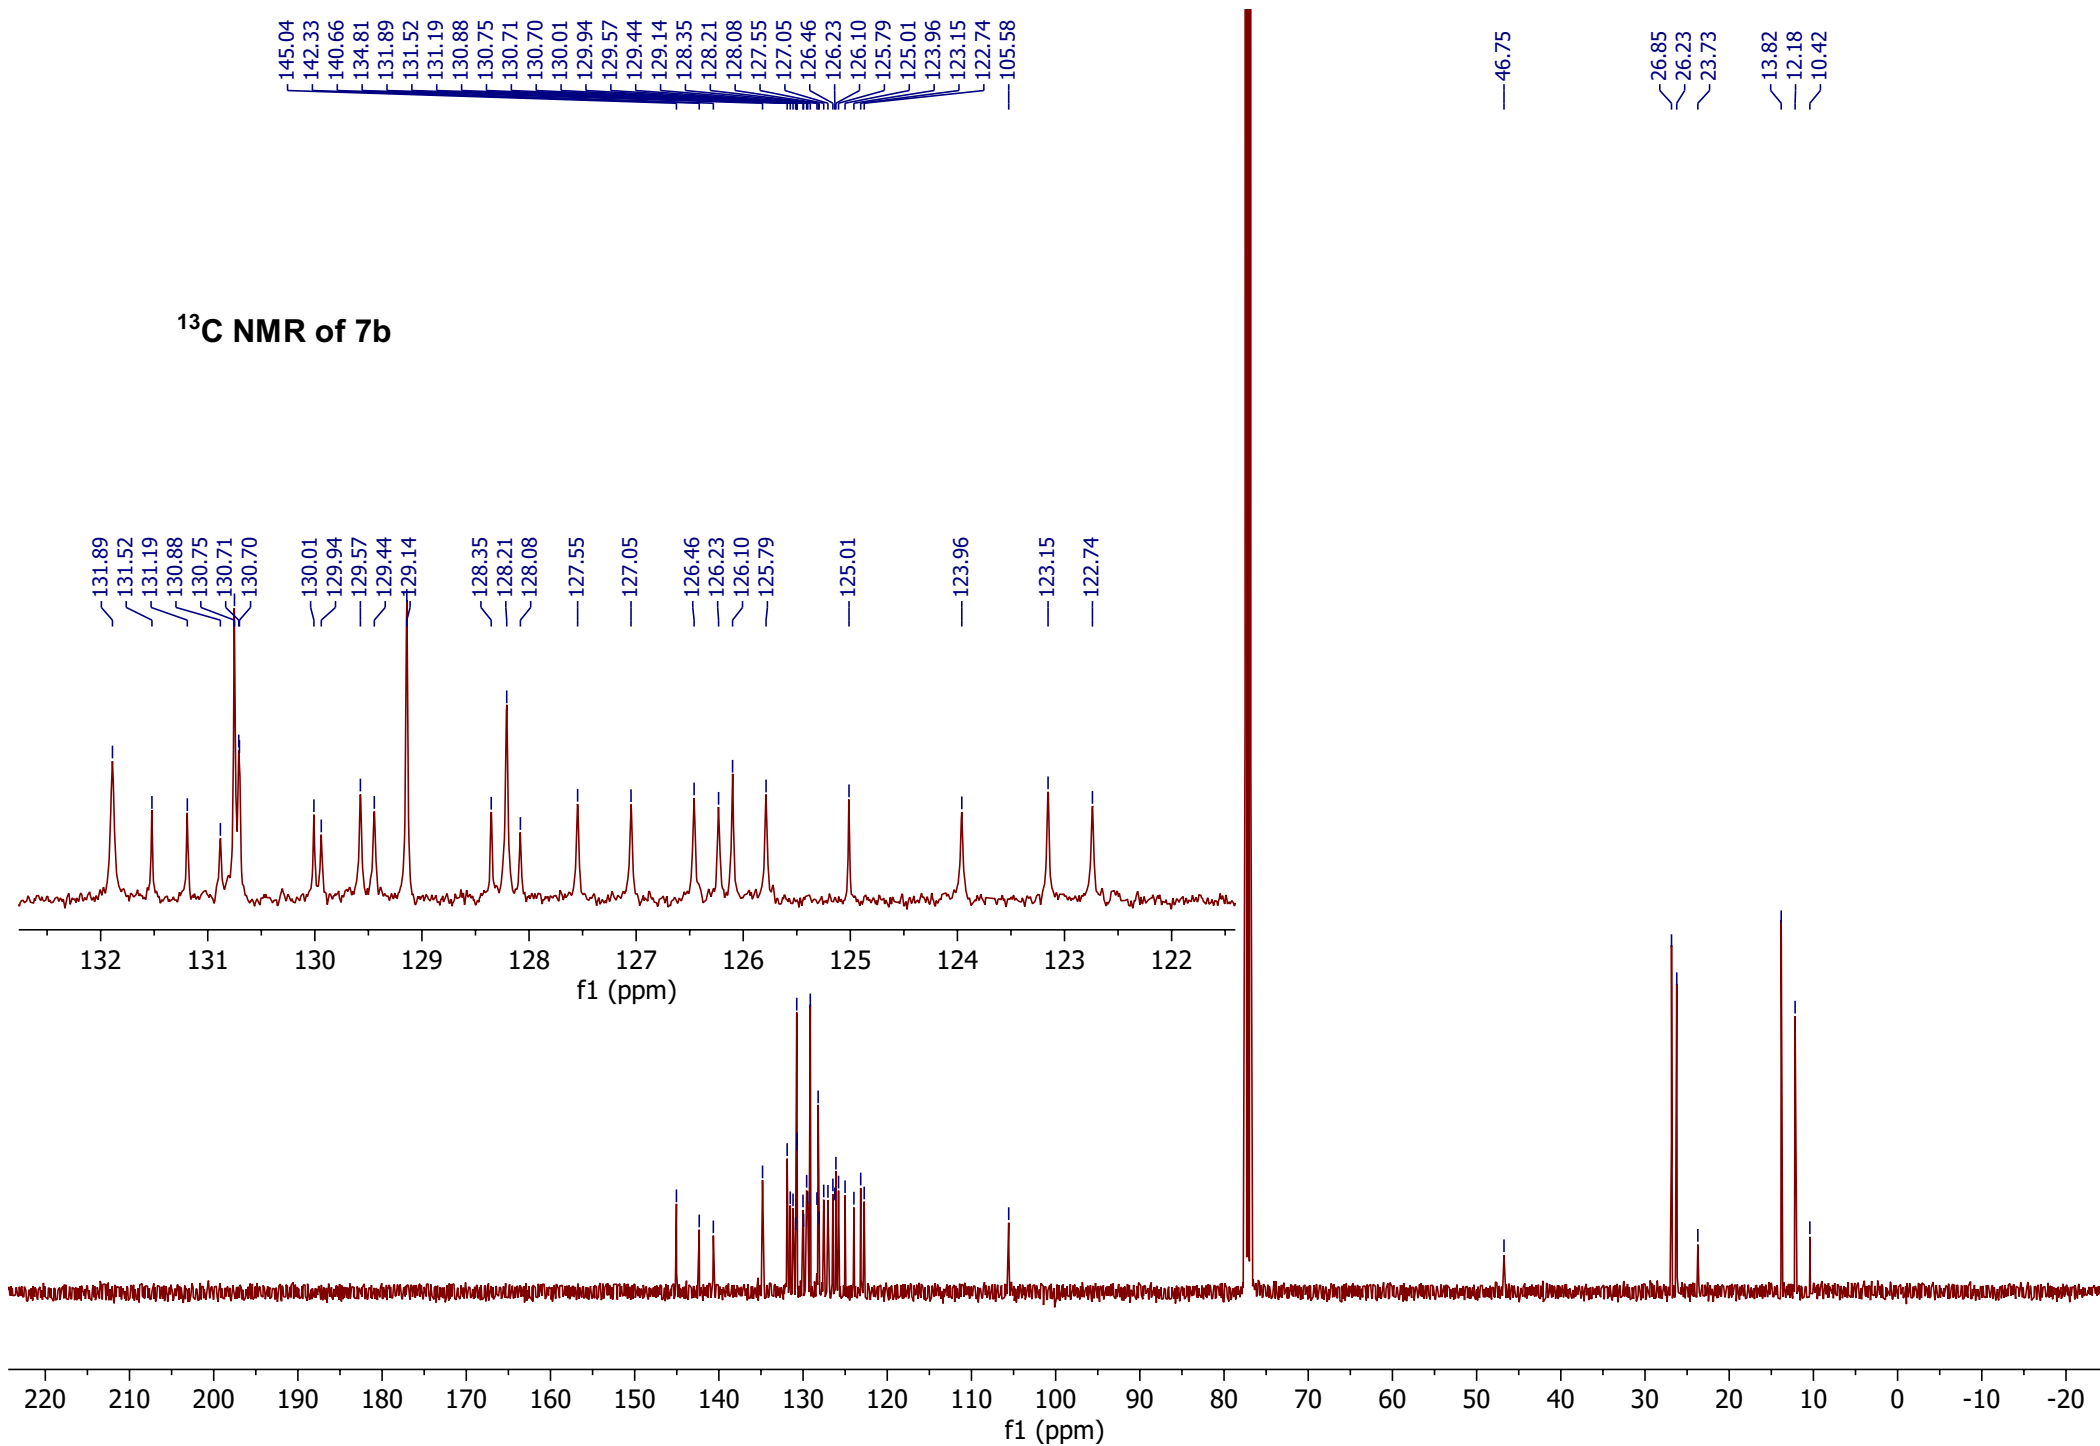



**$^{77}\text{Se}$  NMR of 7b**

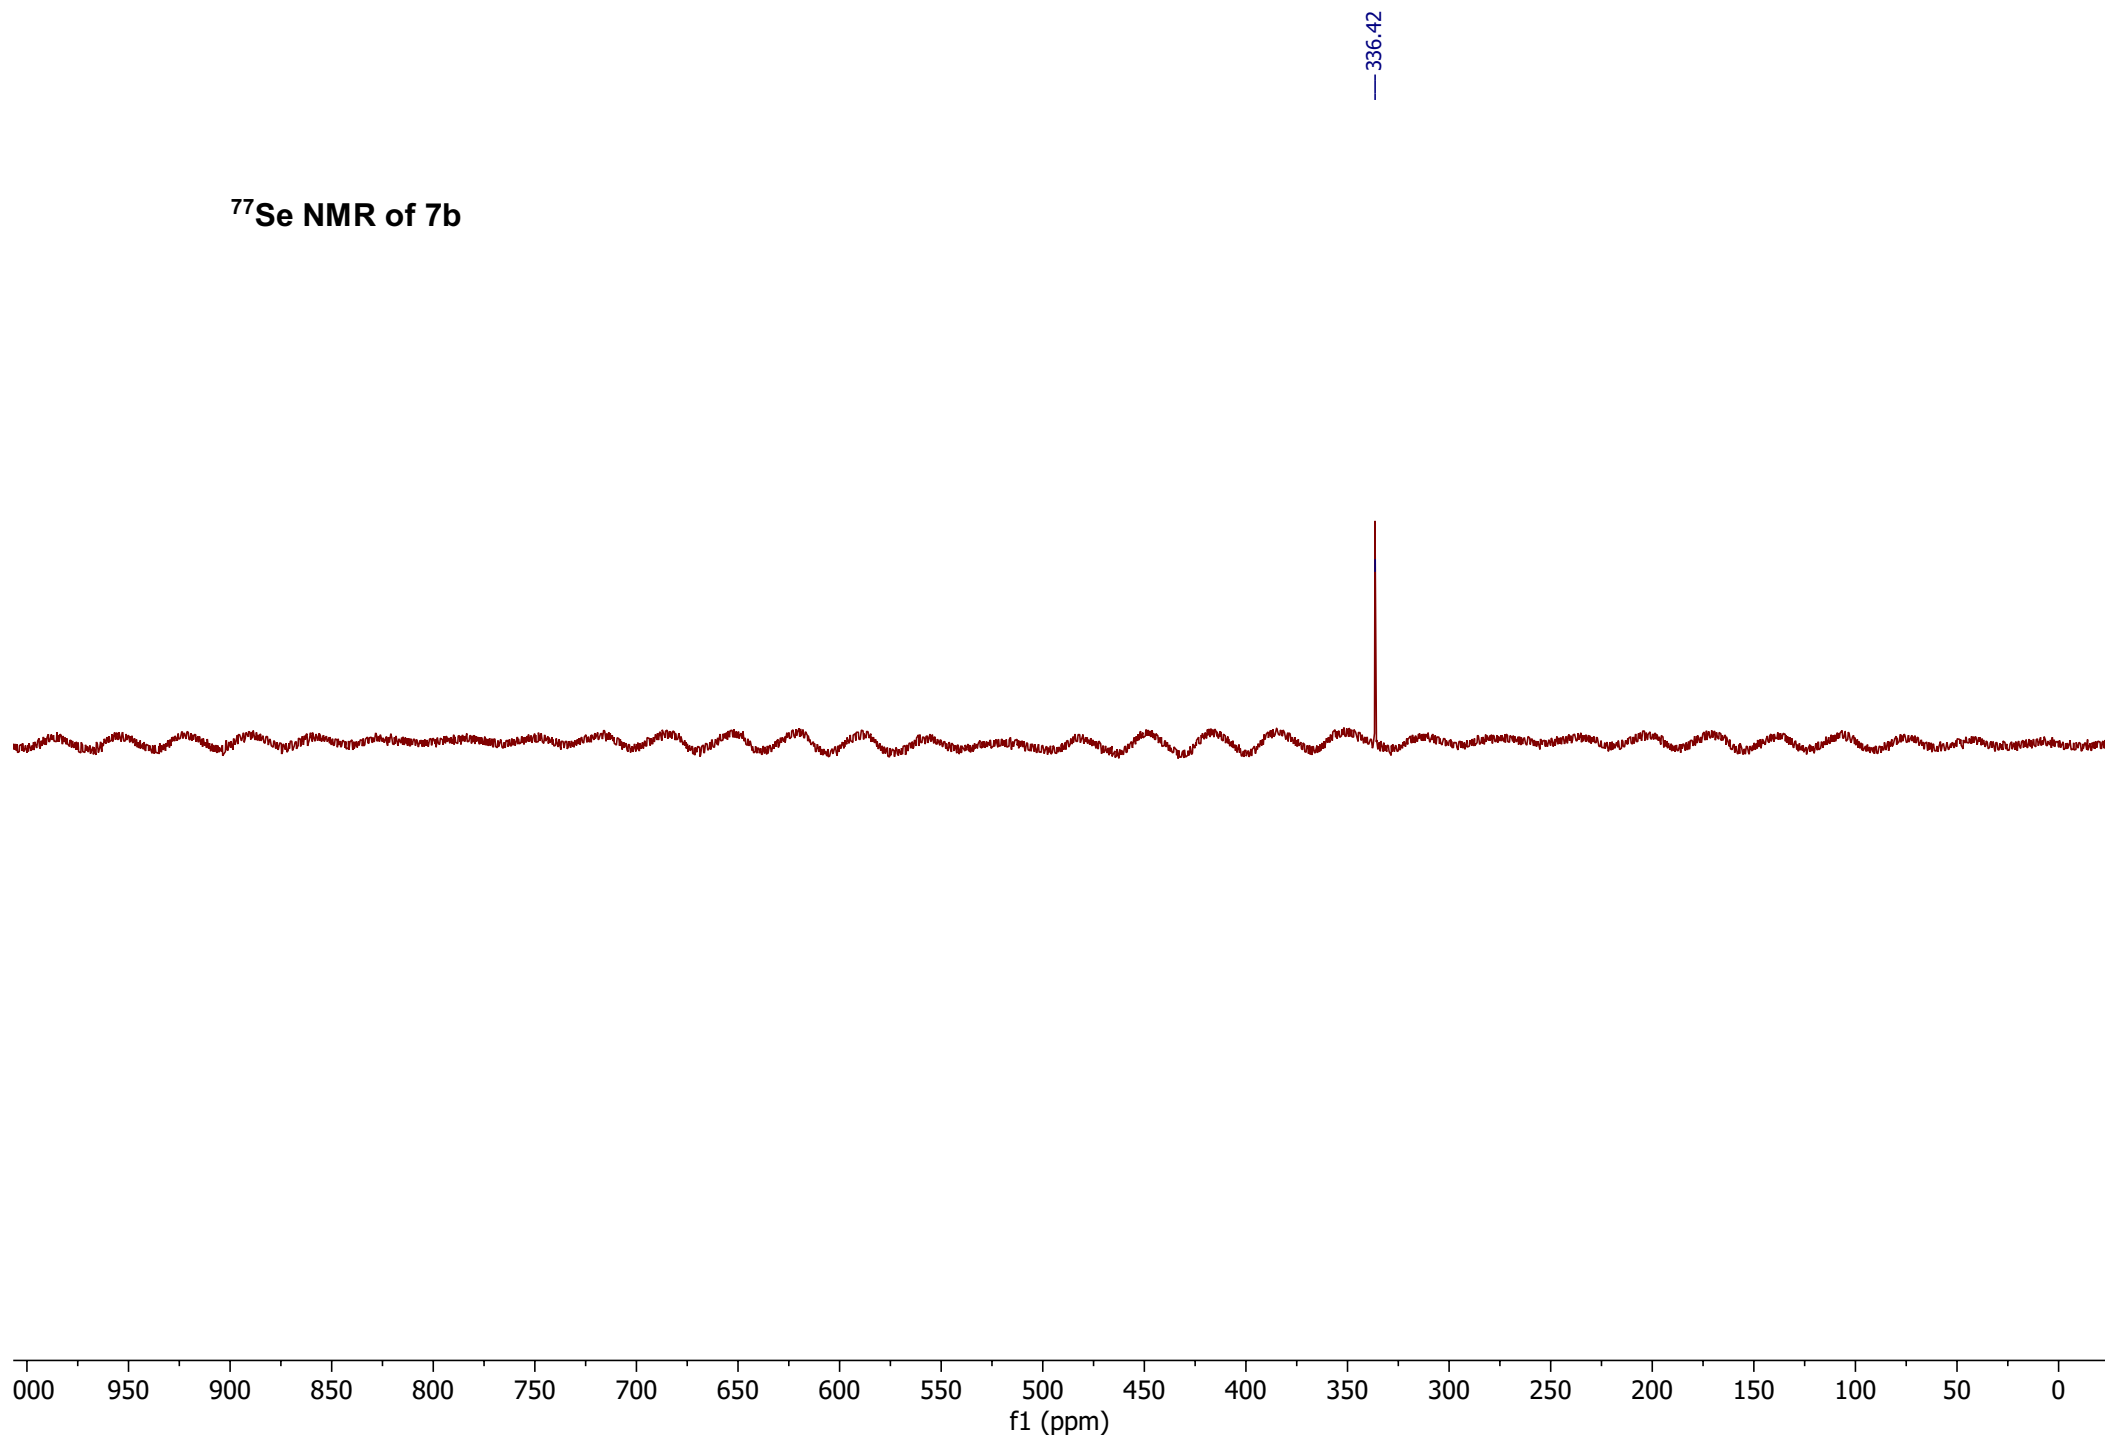

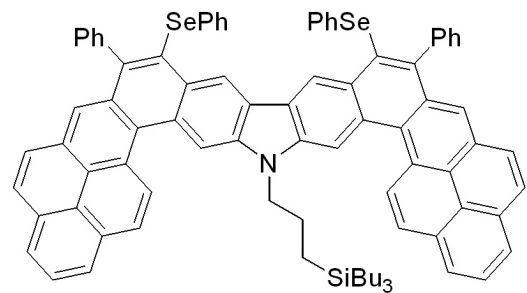

**7c**

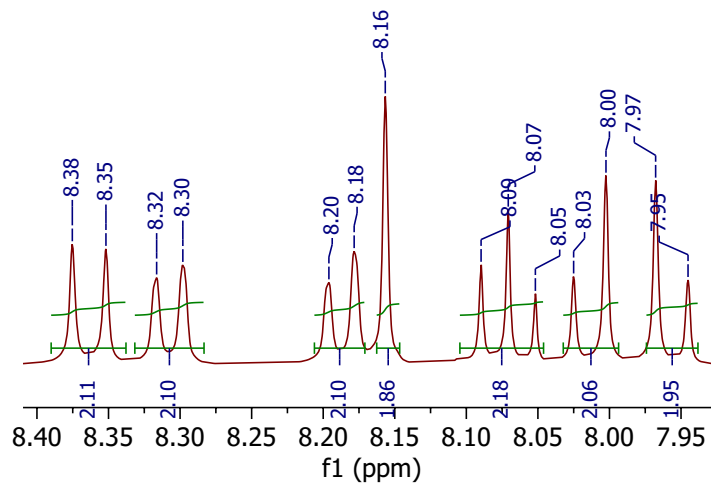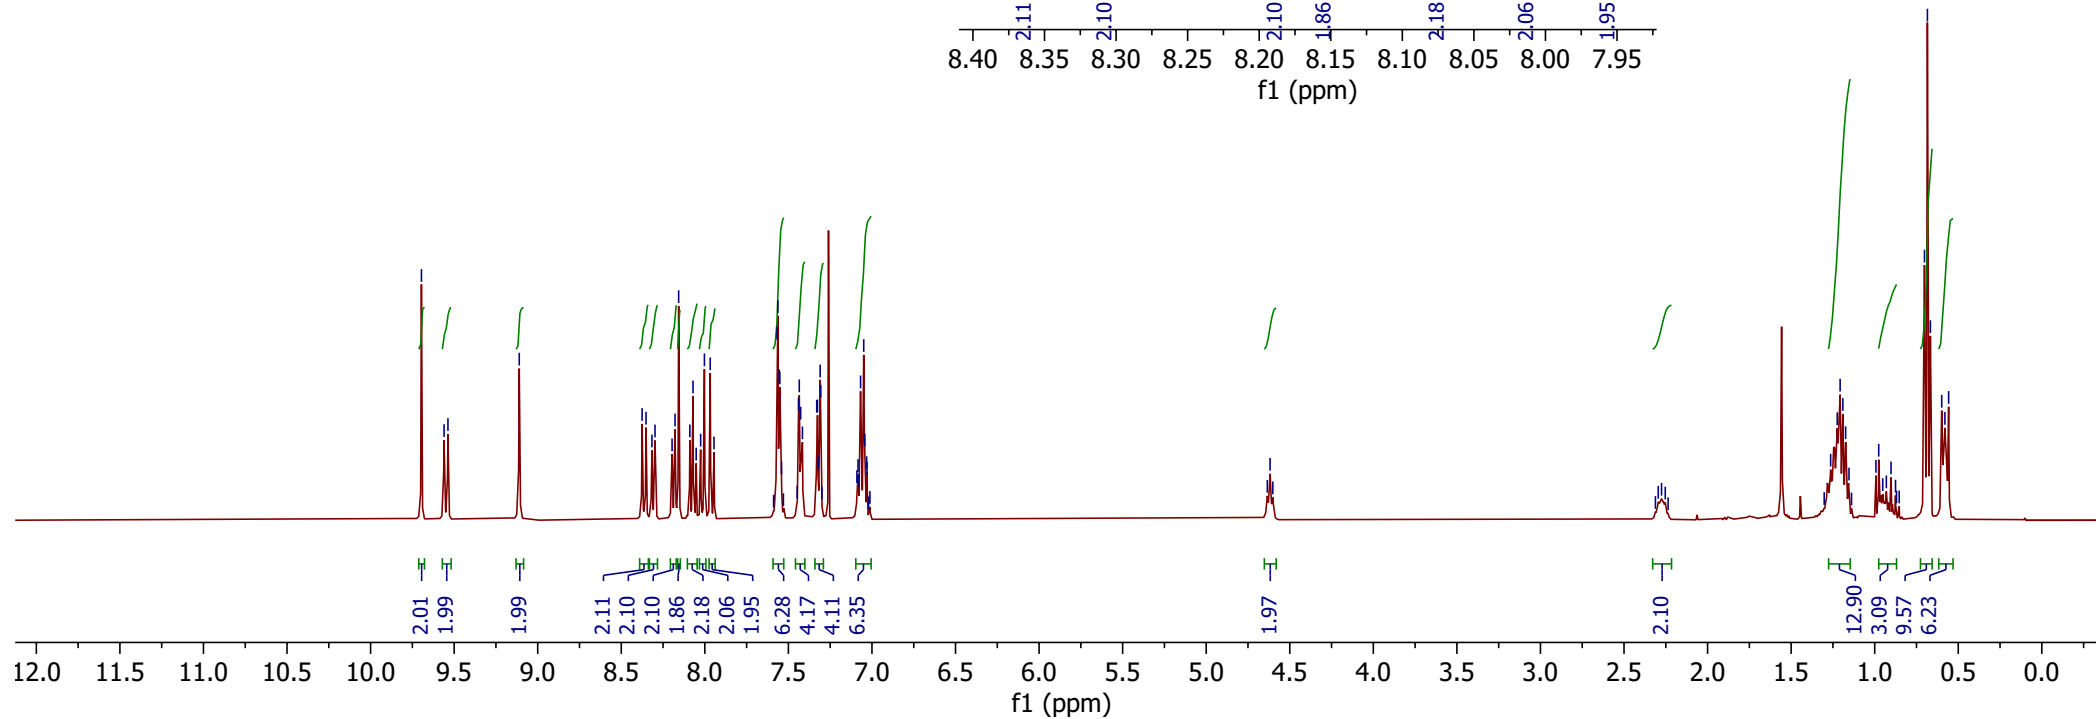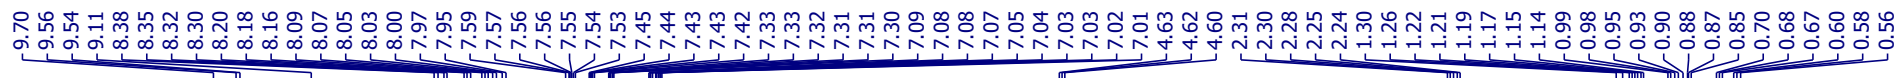

# <sup>13</sup>C NMR of 7c

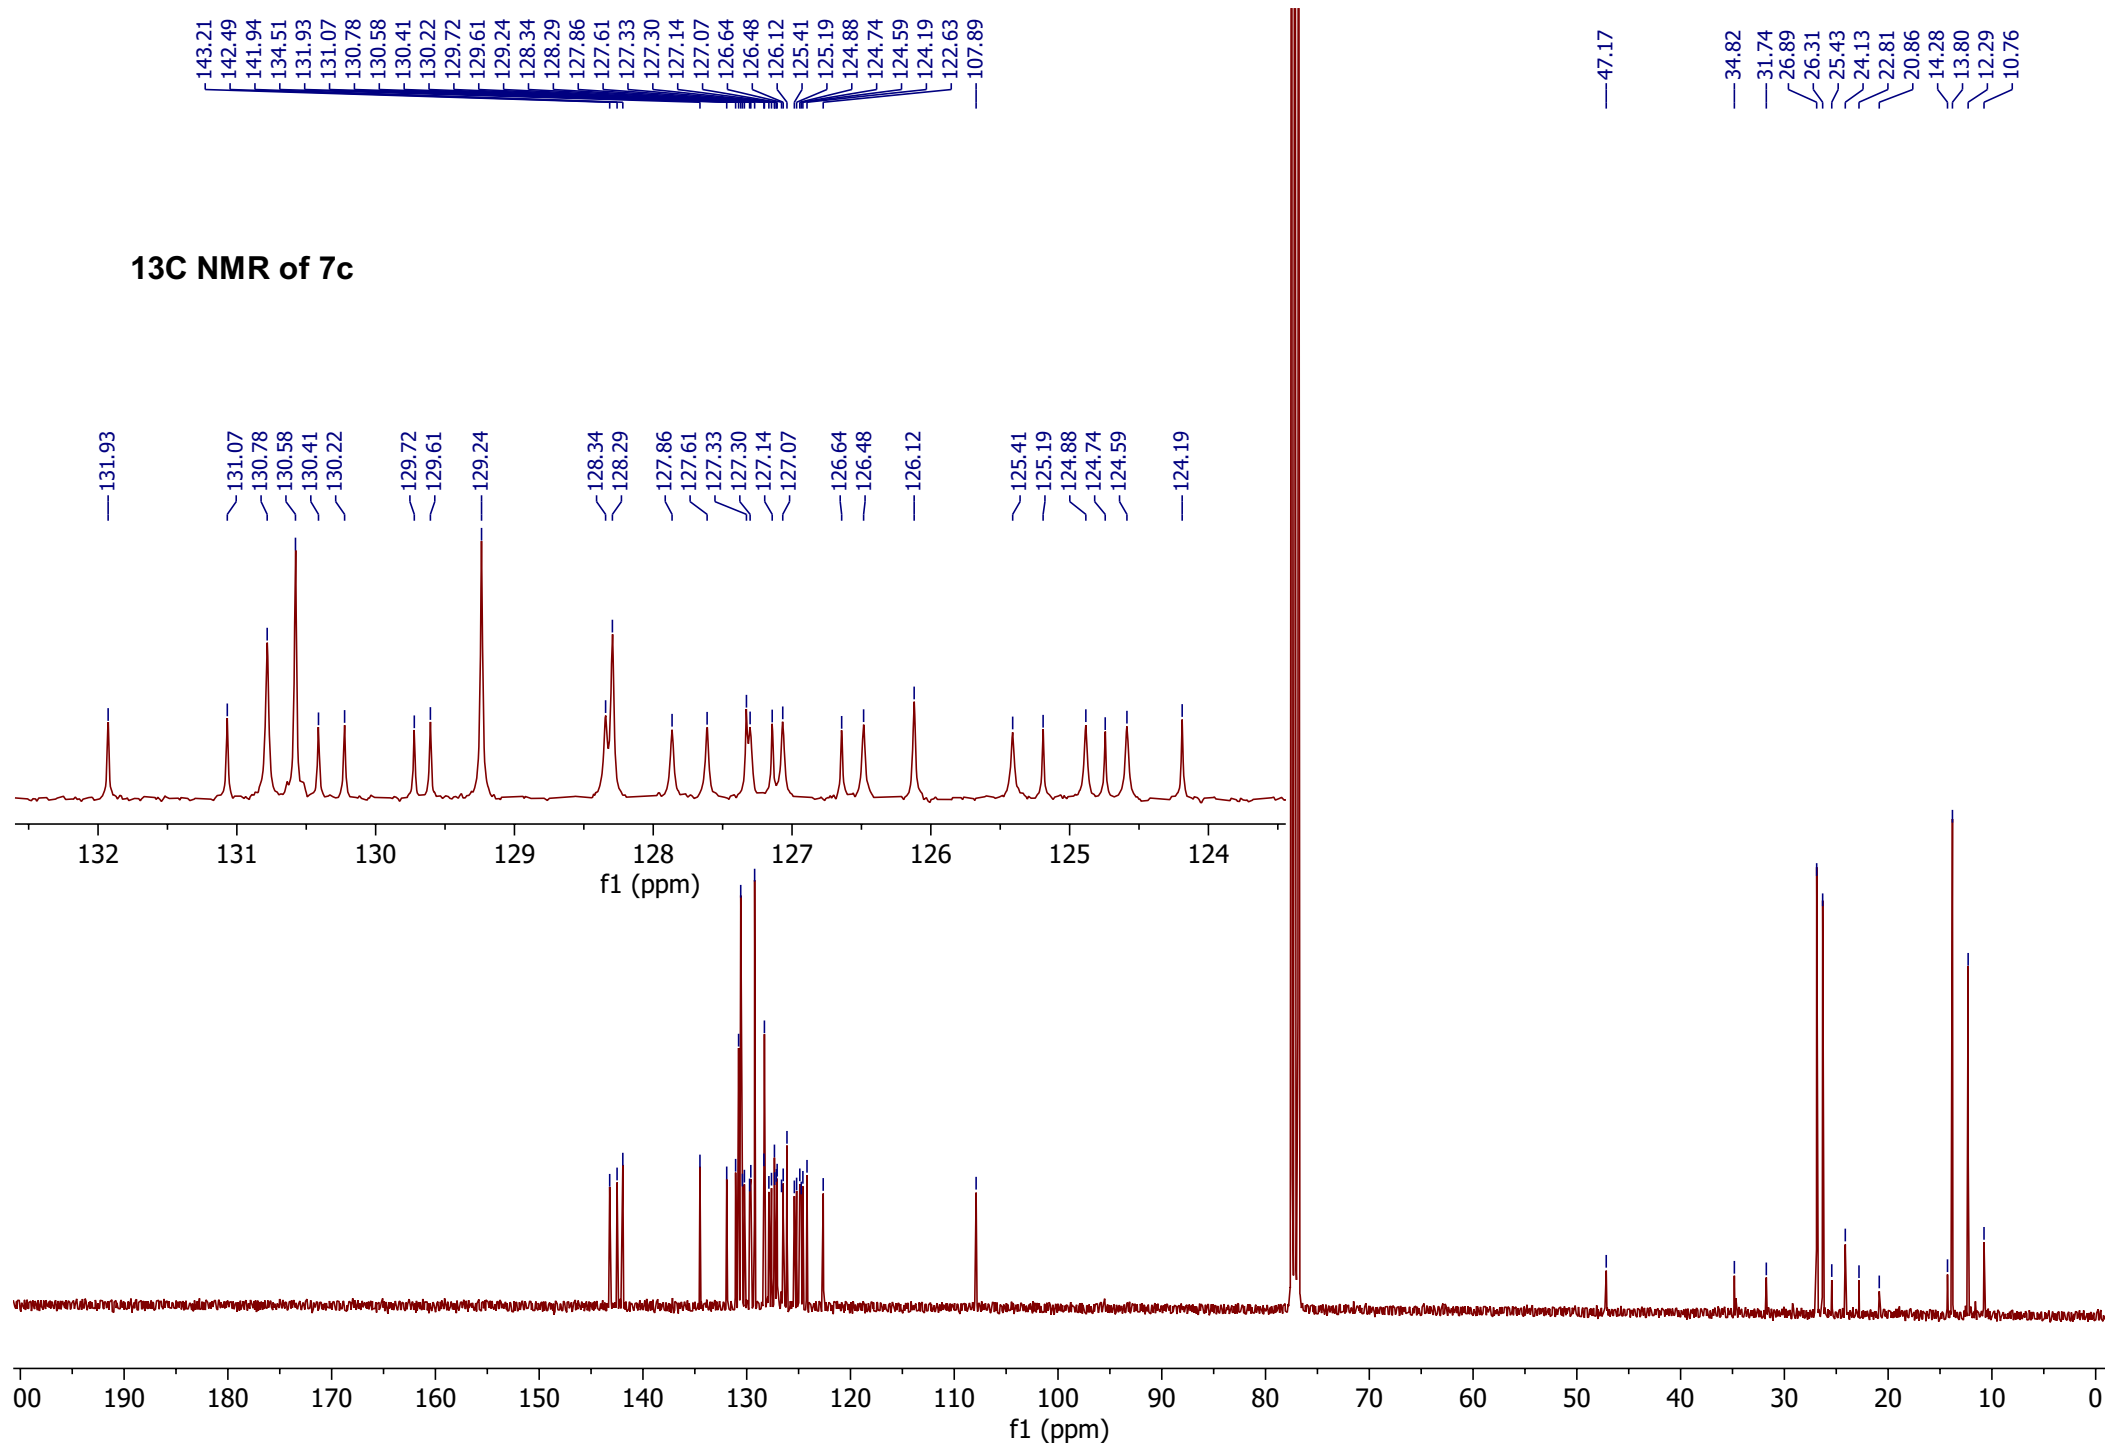

<sup>77</sup>Se NMR of 7c

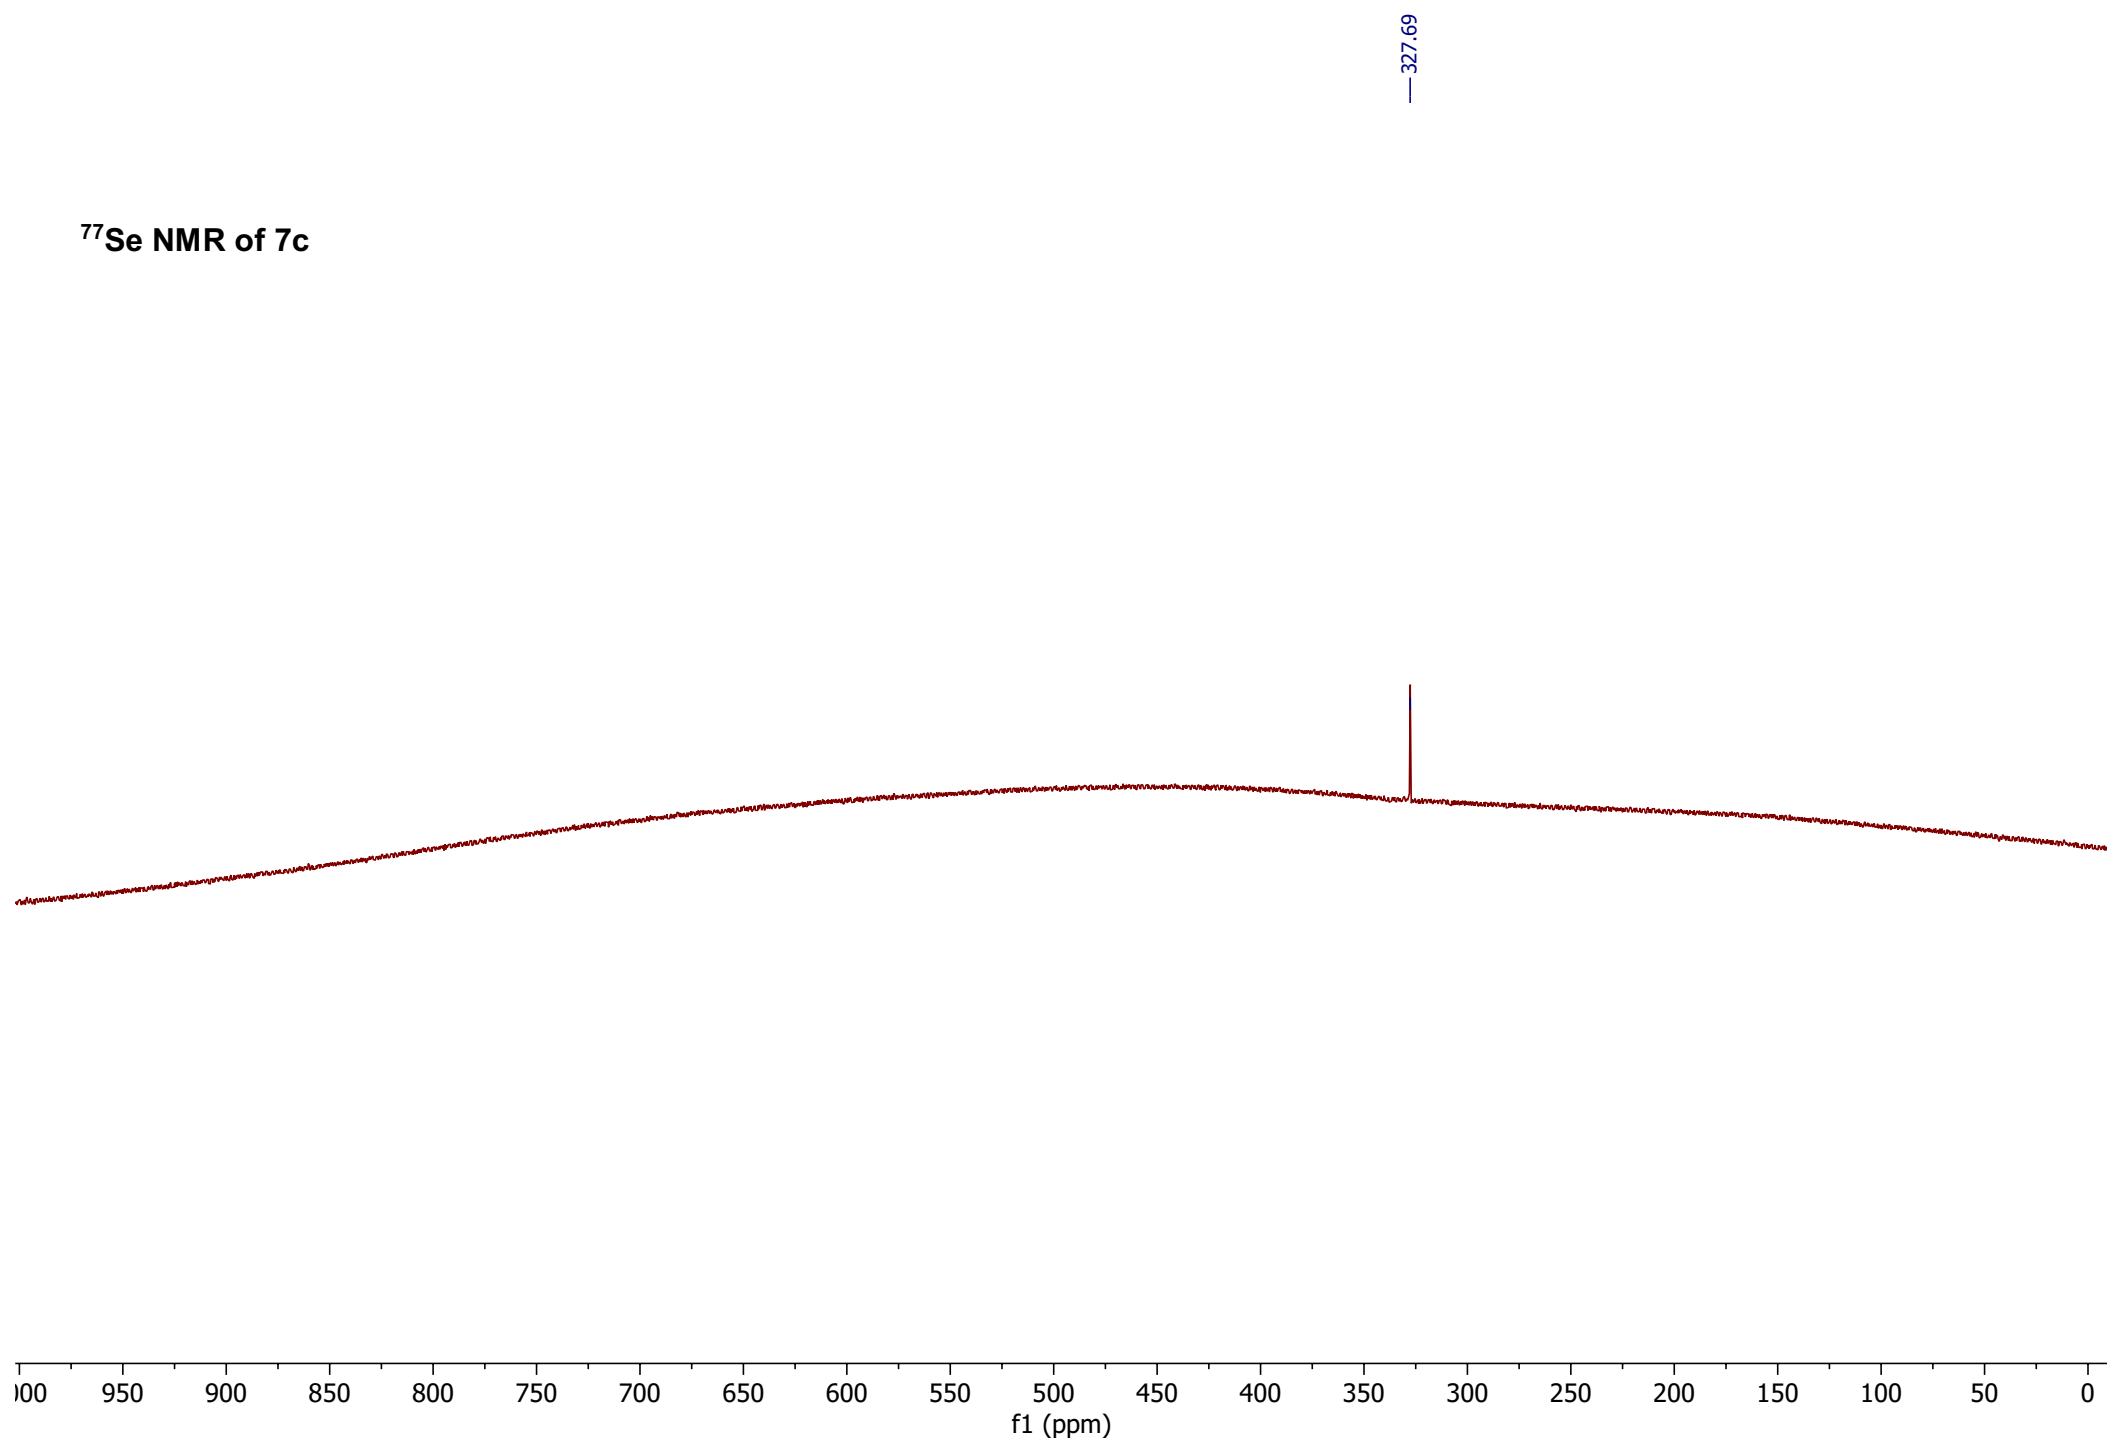

Supplement: d1nj00401h1.pdf [file d1nj00401h1.pdf]
